# Supplementary material
Source: publisher figshare collection journal article supplement (https://acs.figshare.com/ndownloader/files/3939622)
Supplement: Supplementary file 1 [file 3939622]

## Sheet: Table S1
No.	Abbreviation	Ionic Liquid Name	CAS registry number	Molecular formaula	Molecular structure	Molecular weight
1	[C2mim][NTf2]	1-ethyl-3-methylimidazolium bis(trifluoromethylsulfonyl)imide	174899-82-2	C8H11F6N3O4S2		391.32
2	[C4mim][NTf2]	1-butyl-3-mthylimidazolium bis(trifluoromethylsulfonyl)imide	174899-83-3	C10H15F6N3O4S2		419.37
3	[C6mim][NTf2]	1-hexyl-3-methylimidazolium bis(trifluoromethylsulfonyl)imide	382150-50-7	C12H19F6N3O4S2		447.42
4	[C8mim][NTf2]	1-octyl-3-methylpydridinium bis(trifluoromethylsulfonyl)imide	178631-04-4	C14H23F6N3O4S2		475.48
5	[C10mim][NTf2]	1-decyl-3-methylimidazolium bis(trifluoromethylsulfonyl)imide	433337-23-6	C16H27F6N3O4S2		503.53
6	[C4mim][OTf]	1-butyl-3-methylimidazolium trifluoromethanesulfonate	174899-66-2	C9H15F3N2O3S		288.29
7	[C2mim][EtSO4]	1-ethyl-3-methylimidazolium ethyl sulfate	342573-75-5	C8H16N2O4S		236.29
8	[C2mim][OcSO4]	1-ethyl-3-methylimidazolium octyl sulfate	790663-79-5	C14H28N2O4S		320.45
9	[C4mpyrr][FAP]	1-butyl-1-methylpyrrolidinium tris(pentafluoroethyl)trifluorophosphate	851856-47-8	C15H20F18NP		587.28
10	[C4mpyrr][NTf2]	1-butyl-1-methylpyrrolidinium bis(trifluoromethylsulfonyl)imide	223437-11-4	C11H20F6N2O4S2		422.41
11	[P4,4,4,16][FAP]	trihexyltetradecylphosphonium tris(pentafluoroethyl)trifluorophosphate	883860-35-3	C38H68F18P2		928.88
12	[P6,6,6,14][NTf2]	trihexyl(tetradecyl)phosphonium bis(trifluoromethylsulfonyl)imide	460092-03-9	C34H68F6NO4S2P		764.01
13	[P4,4,4,16][Phosph]	trihexyl(tetradecyl)phosphonium bis(2,4,4-trimethylpentyl)phosphinate	465527-59-7	C48H102O2P2		773.27
14	[P6,6,6,14][Cl]	trihexyl(tetradecyl)phosphonium chloride	258864-54-9	C32H68PCl		519.32
15	[P4,4,4,1][MeSO4]	tributyl(methyl)phosphonium methyl sulfate	-	C14H33O4SP		328.45
16	[C4mim][BF4]	1-butyl-3-methylimidazolium tetrafluoroborate	174501-65-6	C8H15BF4N2		226.03
17	[C6mim][BF4]	1-hexyl-3-methylimidazolium tetrafluoroborate	244193-50-8	C10H19BF4N2		254.08
18	[C8mim][BF4]	1-octyl-3-methylimidazolium tetrafluoroborate	244193-52-0	C12H23BF4N2		282.13
19	[C4mim][PF6]	1-butyl-3-methylimidazolium hexafluorophosphate	174501-64-5	C8H15F6N2P		284.18
20	[C6mim][PF6]	1-hexyl-3-methylimidazolium hexafluorophosphate	304680-35-1	C10H19F6N2P		312.24
21	[C8mim][PF6]	1-octyl-3-methylimidazolium hexafluorophosphate	304680-36-2	C12H23F6N2P		340.29
22	[C2mim][CH3COO]	1-ethyl-3-methylimidazolium acetate	143314-17-4	C8H14N2O2		170.21
23	[C2mim][DCA]	1-ethyl-3-methylimidazolium dicyanamide	370856-89-7	C8H11N5		177.21
24	[C2mim][C(CN)3]	1-ethyl-3-methylimidazolium tricyanomethanide	-	C10H11N5		201.23
25	[C2mim][MeOHPO2]	1-ethyl-3-methylimidazolium methylphosphonate	1137959-66-0	C7H15N2O3P		206.18
26	[C4bim][NTf2]	1,3-dibutylimidazolium bis(trifluoromethylsulfonyl)imide	749921-07-1	C13H21F6N3O4S2		461.45
27	[N8,8,8,1][NTf2]	trioctylmethylammonium bis(trifluoromethylsulfonyl)imide	375395-33-8	C27H54F6N2O4S2		648.86
28	[N4,4,4,1][Ser]	tributylmethylammonium serinate	-	C16H36N2O3		304.47
29	[N4,4,4,1][Tau]	tributylmethylammonium taurinate	-	C15H36N2O3S		324.53
30	[N4,4,4,1][Lys]	tributylmethylammonium lysinate	-	C19H43N3O2		345.57
31	[N4,4,4,1][Thr]	tributylmethylammonium threonate	-	C17H38N2O3		318.5
32	[P4,4,4,4][Ser]	tetrabutylphosphonium serinate	-	C19H42NO3P		363.52
33	[P4,4,4,4][Tau]	tetrabutylphosphonium taurinate	-	C18H42NO3SP		383.58
34	[P4,4,4,4][Lys]	tetrabutylphosphonium lysinate	-	C22H49N2O2P		404.62
35	[P4,4,4,4][Thr]	tetrabutylphosphonium threonate	-	C20H44NO3P		377.55
36	[P4,4,4,4][Pro]	tetrabutylphosphonium prolinate	-	C21H44NO2P		373.56
37	[P4,4,4,4][Val]	tetrabutylphosphonium valinate	-	C21H46NO2P		375.58
38	[P4,4,4,4][Cys]	tetrabutylphosphonium cysteinate	-	C19H42NO2SP		379.59
39	[C4mim][NPf2]	1-butyl-3-methylimidazolium bis(perfluoroethylsulfonyl)imide	-	C12H15F10N3O4S2		519.38
40	[N4,1,1,1][ NTf2]	trimethylbutylammonium bis(trifluoromethylsulfonyl)imide	258273-75-5	C9H18F6N2O4S2		396.38
41	[N4COOH,1,1,1][ NTf2]	trimethylbutanoicacidammonium bis(trifluoromethylsulfonyl)imide	-	C9H16F6N2O6S2		426.36
42	[C4mmim][ NTf2]	1-butyl-2,3-dimethylimidazolium bis(trifluoromethylsulfonyl)imide	350493-08-2	C11H17F6N3O4S2		433.4
43	[C4py][BF4]	1-butylpyridinium tetrafluoroborate	203389-28-0	C9H14BF4N		223.02
44	[C6py][BF4]	1-hexylpyridinium tetrafluoroborate	474368-70-2	C11H18BF4N		251.08
45	[C8py][BF4]	1-octylpyridinium tetrafluoroborate	-	C13H22BF4N		279.13

## Sheet: Table S2
Ionic liquids	Reference	Measurement method	Measurement apparatus	Measurement uncertainty	Source	Purity	Purification method	Thermal conductivity λexp	T/ K	P / Mpa
[C2mim][NTf2]	Ge, R.; Hardacre, C.; Nancarrow, P.; Rooney, D. W. Thermal Conductivities of Ionic Liquids over the Temperature Range from 293 K to 353 K. J. Chem. Eng. Data 2007, 52, 1819.	transient hot-wire method	KD2 Pro Thermal Properties Analyzer (Labcell Ltd., UK).	less than ± 0.002 W m-1 K-1	synthesized	water < 800ppm, Cl < 5ppm	washed 5 to 6 times using distilled water and dried overnight at 70 °C under a high vacuum (0.1Pa)	0.13	293	0.1
								0.13	303	0.1
								0.129	313	0.1
								0.129	323	0.1
								0.129	333	0.1
								0.129	343	0.1
								0.128	353	0.1
	Froba, A. P.; Rausch, M. H.; Krzeminski, K.; Assenbaum, D.; Wasserscheid, P.; Leipertz, A. Thermal Conductivity of Ionic Liquids: Measurement and Prediction. Int. J. Thermophys. 2010, 31, 2059.	parallel-plate method	stationary guarded parallelplate instrument	0.03	Solvent Innovation GmbH, Cologne, Germany	water = 333ppm	dried at about 333.15 K for at least 4h on a vacuum line (0.5 mbar) with an oil-sealed vacuum pump and a liquid nitrogen trap	0.1208	273.15	0.1
								0.1206	283.15	0.1
								0.1202	293.15	0.1
								0.1215	303.15	0.1
								0.1195	313.15	0.1
								0.1184	323.15	0.1
								0.119	333.15	0.1
								0.1194	343.15	0.1
								0.1191	353.15	0.1
[C4mim][NTf2]	Ge, R.; Hardacre, C.; Nancarrow, P.; Rooney, D. W. Thermal Conductivities of Ionic Liquids over the Temperature Range from 293 K to 353 K. J. Chem. Eng. Data 2007, 52, 1819.	transient hot-wire method	KD2 Pro Thermal Properties Analyzer (Labcell Ltd., UK).	less than ± 0.002 W m-1 K-1	synthesized	water < 800ppm, Cl < 5ppm	washed 5 to 6 times using distilled water and dried overnight at 70 °C under a high vacuum (0.1Pa)	0.128	293	0.1
								0.127	303	0.1
								0.127	313	0.1
								0.126	323	0.1
								0.125	333	0.1
								0.124	343	0.1
								0.124	353	0.1
	Liu, H.; Maginn, E.; Visser, A. E.; Bridges, N. J.; Fox, E. B. Thermal and Transport Properties of Six Ionic Liquids: An Experimental and Molecular Dynamics Study. Ind. Eng. Chem. Res. 2012, 51, 7242.	transient hot-wire method	Decagon KD2 Thermal Properties Analyzer	-	Ionic Liquid Technologies, Inc.	no residual chloride	diluted	0.126354	296.237	0.1
								0.125618	312.773	0.1
								0.12322	332.359	0.1
[C6mim][NTf2]	Ge, R.; Hardacre, C.; Nancarrow, P.; Rooney, D. W. Thermal Conductivities of Ionic Liquids over the Temperature Range from 293 K to 353 K. J. Chem. Eng. Data 2007, 52, 1819.	transient hot-wire method	KD2 Pro Thermal Properties Analyzer (Labcell Ltd., UK).	less than ± 0.002 W m-1 K-1	synthesized	water < 800ppm, Cl < 5ppm	washed 5 to 6 times using distilled water and dried overnight at 70 °C under a high vacuum (0.1Pa)	0.127	293	0.1
								0.127	303	0.1
								0.127	313	0.1
								0.126	323	0.1
								0.125	333	0.1
								0.125	343	0.1
								0.125	353	0.1
	Froba, A. P.; Rausch, M. H.; Krzeminski, K.; Assenbaum, D.; Wasserscheid, P.; Leipertz, A. Thermal Conductivity of Ionic Liquids: Measurement and Prediction. Int. J. Thermophys. 2010, 31, 2059.	parallel-plate method	stationary guarded parallelplate instrument	0.03	synthesized	water = 86ppm	dried at about 333.15 K for at least 4h on a vacuum line (0.5 mbar) with an oil-sealed vacuum pump and a liquid nitrogen trap	0.1238	273.15	0.1
								0.1224	283.15	0.1
								0.1219	293.15	0.1
								0.1237	303.15	0.1
								0.122	313.15	0.1
								0.1201	323.15	0.1
								0.1208	333.15	0.1
								0.1212	343.15	0.1
								0.1209	353.15	0.1
[C8mim][NTf2]	Ge, R.; Hardacre, C.; Nancarrow, P.; Rooney, D. W. Thermal Conductivities of Ionic Liquids over the Temperature Range from 293 K to 353 K. J. Chem. Eng. Data 2007, 52, 1819.	transient hot-wire method	KD2 Pro Thermal Properties Analyzer (Labcell Ltd., UK).	less than ± 0.002 W m-1 K-1	synthesized	water < 800ppm, Cl < 5ppm	washed 5 to 6 times using distilled water and dried overnight at 70 °C under a high vacuum (0.1Pa)	0.128	293	0.1
								0.128	303	0.1
								0.128	313	0.1
								0.126	323	0.1
								0.126	333	0.1
								0.125	343	0.1
								0.126	353	0.1
[C10mim][NTf2]	Ge, R.; Hardacre, C.; Nancarrow, P.; Rooney, D. W. Thermal Conductivities of Ionic Liquids over the Temperature Range from 293 K to 353 K. J. Chem. Eng. Data 2007, 52, 1819.	transient hot-wire method	KD2 Pro Thermal Properties Analyzer (Labcell Ltd., UK).	less than ± 0.002 W m-1 K-1	synthesized	water < 800ppm, Cl < 5ppm	washed 5 to 6 times using distilled water and dried overnight at 70 °C under a high vacuum (0.1Pa)	0.132	293	0.1
								0.131	303	0.1
								0.13	313	0.1
								0.129	323	0.1
								0.128	333	0.1
								0.128	343	0.1
								0.128	353	0.1
[C4mim][OTf]	Ge, R.; Hardacre, C.; Nancarrow, P.; Rooney, D. W. Thermal Conductivities of Ionic Liquids over the Temperature Range from 293 K to 353 K. J. Chem. Eng. Data 2007, 52, 1819.	transient hot-wire method	KD2 Pro Thermal Properties Analyzer (Labcell Ltd., UK).	less than ± 0.002 W m-1 K-1	synthesized	water < 800ppm, Cl < 5ppm	washed 5 to 6 times using distilled water and dried overnight at 70 °C under a high vacuum (0.1Pa)	0.147	293	0.1
								0.146	303	0.1
								0.145	313	0.1
								0.144	323	0.1
								0.144	333	0.1
								0.143	343	0.1
								0.142	353	0.1
	Nieto De Castro, C. A.; Lourenco, M. J. V.; Ribeiro, A. P. C.; Langa, E.; Vieira, S. I. C.; Goodrich, P.; Hardacre, C. Thermal Properties of Ionic Liquids and Ionanofluids of Imidazolium and Pyrrolidinium Liquids. J. Chem. Eng. Data 2010, 55, 653.	transient hot-wire method	KD2 Pro Thermal Properties Analyzer (Labcell Ltd., UK).	less than ± 0.005 W m-1 K-1	synthesized	water < 200ppm, Cl < 5ppm	washed using distilled water and dried while stirring overnight at 70°C under high vacuum (0.1 Pa)	0.142	293	0.1
								0.141	303	0.1
								0.14	313	0.1
								0.139	323	0.1
								0.139	333	0.1
								0.138	343	0.1
								0.138	353	0.1
[C2mim][EtSO4]	Ge, R.; Hardacre, C.; Nancarrow, P.; Rooney, D. W. Thermal Conductivities of Ionic Liquids over the Temperature Range from 293 K to 353 K. J. Chem. Eng. Data 2007, 52, 1819.	transient hot-wire method	KD2 Pro Thermal Properties Analyzer (Labcell Ltd., UK).	less than ± 0.002 W m-1 K-1	synthesized	water < 800ppm, Cl < 5ppm	washed 5 to 6 times using distilled water and dried overnight at 70 °C under a high vacuum (0.1Pa)	0.182	293	0.1
								0.181	303	0.1
								0.181	313	0.1
								0.179	323	0.1
								0.179	333	0.1
								0.178	343	0.1
								0.177	353	0.1
	Froba, A. P.; Rausch, M. H.; Krzeminski, K.; Assenbaum, D.; Wasserscheid, P.; Leipertz, A. Thermal Conductivity of Ionic Liquids: Measurement and Prediction. Int. J. Thermophys. 2010, 31, 2059.	parallel-plate method	stationary guarded parallelplate instrument	0.03	synthesized	water = 2180ppm	dried at about 333.15 K for at least 4h on a vacuum line (0.5 mbar) with an oil-sealed vacuum pump and a liquid nitrogen trap	0.1876	273.15	0.1
								0.1882	283.15	0.1
								0.1856	293.15	0.1
								0.1872	303.15	0.1
								0.184	313.15	0.1
								0.1833	323.15	0.1
								0.1832	333.15	0.1
								0.1834	343.15	0.1
								0.183	353.15	0.1
	Chen, Q.; Wu, K.; He, C. Thermal Conductivities of [EMIM][EtSO4], [EMIM][EtSO4] + C2H5OH, [EMIM][EtSO4] + H2O, and [EMIM][EtSO4] + C2H5OH + H2O at T = (283.15 to 343.15) K. J. Chem. Eng. Data 2013, 58, 2058.	transient hot-wire method	TC 3020L (Xi’an Xiatech Electronic Technology Co., Ltd.)	0.02	Lanzhou Greenchem ILS, LICP	water < 700ppm		0.185	283.11	0.1
								0.186	293.16	0.1
								0.185	303.16	0.1
								0.185	313.04	0.1
								0.184	323.02	0.1
								0.184	332.91	0.1
								0.184	342.89	0.1
								0.183	352.82	0.1
[C2mim][OcSO4]	Froba, A. P.; Rausch, M. H.; Krzeminski, K.; Assenbaum, D.; Wasserscheid, P.; Leipertz, A. Thermal Conductivity of Ionic Liquids: Measurement and Prediction. Int. J. Thermophys. 2010, 31, 2059.	parallel-plate method	stationary guarded parallelplate instrument	0.03	synthesized	water = 1320ppm	dried at about 333.15 K for at least 4h on a vacuum line (0.5 mbar) with an oil-sealed vacuum pump and a liquid nitrogen trap	0.1712	273.15	0.1
								0.1711	283.15	0.1
								0.167	293.15	0.1
								0.1679	303.15	0.1
								0.1648	313.15	0.1
								0.1629	323.15	0.1
								0.1631	333.15	0.1
								0.1626	343.15	0.1
								0.1621	353.15	0.1
[C4mpyrr][FAP]	Ge, R.; Hardacre, C.; Nancarrow, P.; Rooney, D. W. Thermal Conductivities of Ionic Liquids over the Temperature Range from 293 K to 353 K. J. Chem. Eng. Data 2007, 52, 1819.	transient hot-wire method	KD2 Pro Thermal Properties Analyzer (Labcell Ltd., UK).	less than ± 0.002 W m-1 K-1	Merck	water < 800ppm, Cl < 5ppm	washed 5 to 6 times using distilled water and dried overnight at 70 °C under a high vacuum (0.1Pa)	0.107	293	0.1
								0.106	303	0.1
								0.106	313	0.1
								0.105	323	0.1
								0.105	333	0.1
								0.105	343	0.1
								0.105	353	0.1
[C4mpyrr][NTf2]	Ge, R.; Hardacre, C.; Nancarrow, P.; Rooney, D. W. Thermal Conductivities of Ionic Liquids over the Temperature Range from 293 K to 353 K. J. Chem. Eng. Data 2007, 52, 1819.	transient hot-wire method	KD2 Pro Thermal Properties Analyzer (Labcell Ltd., UK).	less than ± 0.002 W m-1 K-1	synthesized	water < 800ppm, Cl < 5ppm	washed 5 to 6 times using distilled water and dried overnight at 70 °C under a high vacuum (0.1Pa)	0.125	293	0.1
								0.125	303	0.1
								0.124	313	0.1
								0.124	323	0.1
	Nieto De Castro, C. A.; Lourenco, M. J. V.; Ribeiro, A. P. C.; Langa, E.; Vieira, S. I. C.; Goodrich, P.; Hardacre, C. Thermal Properties of Ionic Liquids and Ionanofluids of Imidazolium and Pyrrolidinium Liquids. J. Chem. Eng. Data 2010, 55, 653.	transient hot-wire method	KD2 Pro Thermal Properties Analyzer (Labcell Ltd., UK).	less than ± 0.005 W m-1 K-1	synthesized	water < 200ppm, Cl < 5ppm	washed using distilled water and dried while stirring overnight at 70°C under high vacuum (0.1 Pa)	0.118	293	0.1
								0.118	303	0.1
								0.118	313	0.1
								0.117	323	0.1
								0.117	333	0.1
	Liu, H.; Maginn, E.; Visser, A. E.; Bridges, N. J.; Fox, E. B. Thermal and Transport Properties of Six Ionic Liquids: An Experimental and Molecular Dynamics Study. Ind. Eng. Chem. Res. 2012, 51, 7242.	transient hot-wire method	Decagon KD2 Thermal Properties Analyzer	-	Ionic Liquid Technologies, Inc.	no residual chloride	diluted	0.125747	296.146	0.1
								0.123223	312.62	0.1
								0.12884	332.402	0.1
[P4,4,4,16][FAP]	Ferreira, A. G. M.; Simões, P. N.; Ferreira, A. F.; Fonseca, M. A.; Oliveira, M. S. A.; Trino, A. S. M. Transport and Thermal Properties of Quaternary Phosphonium Ionic Liquids and IoNanofluids. J. Chem. Thermodyn. 2013, 64, 80.	transient hot-wire method	KD2 Pro (Decagon Devices)	less than ± 0.01W m-1 K-1	Merck	water < 130ppm	washed several times using suitable solvents and dried at 343 K under a vacuum of about 1 Pa for several days	0.126	282.19	0.1
								0.125	292.99	0.1
								0.125	298.41	0.1
								0.125	303.54	0.1
								0.123	314.37	0.1
								0.123	325.65	0.1
								0.123	334.58	0.1
								0.123	344.18	0.1
								0.121	355.07	0.1
[P6,6,6,14][NTf2]	Ge, R.; Hardacre, C.; Nancarrow, P.; Rooney, D. W. Thermal Conductivities of Ionic Liquids over the Temperature Range from 293 K to 353 K. J. Chem. Eng. Data 2007, 52, 1819.	transient hot-wire method	KD2 Pro Thermal Properties Analyzer (Labcell Ltd., UK).	less than ± 0.002 W m-1 K-1	synthesized	water < 800ppm, Cl < 5ppm	washed 5 to 6 times using distilled water and dried overnight at 70 °C under a high vacuum (0.1Pa)	0.144	293	0.1
								0.143	303	0.1
								0.142	313	0.1
								0.141	323	0.1
								0.141	333	0.1
								0.14	343	0.1
								0.139	353	0.1
	Ferreira, A. G. M.; Simões, P. N.; Ferreira, A. F.; Fonseca, M. A.; Oliveira, M. S. A.; Trino, A. S. M. Transport and Thermal Properties of Quaternary Phosphonium Ionic Liquids and IoNanofluids. J. Chem. Thermodyn. 2013, 64, 80.	transient hot-wire method	KD2 Pro (Decagon Devices)	less than ± 0.01W m-1 K-1	Cytec	water < 200ppm	washed several times using suitable solvents and dried at 343 K under a vacuum of about 1 Pa for several days	0.139	285.65	0.1
								0.138	293.14	0.1
								0.137	297.72	0.1
								0.137	302.37	0.1
								0.135	313.04	0.1
								0.134	323.58	0.1
								0.135	333.55	0.1
[P4,4,4,16][Phosph]	Ferreira, A. G. M.; Simões, P. N.; Ferreira, A. F.; Fonseca, M. A.; Oliveira, M. S. A.; Trino, A. S. M. Transport and Thermal Properties of Quaternary Phosphonium Ionic Liquids and IoNanofluids. J. Chem. Thermodyn. 2013, 64, 80.	transient hot-wire method	KD2 Pro (Decagon Devices)	less than ± 0.01W m-1 K-1	Cytec	water < 200ppm	washed several times using suitable solvents and dried at 343 K under a vacuum of about 1 Pa for several days	0.137	282.47	0.1
								0.136	292.94	0.1
								0.135	298.04	0.1
								0.135	303.15	0.1
								0.133	313.45	0.1
								0.132	323.45	0.1
								0.131	333.55	0.1
								0.131	343.59	0.1
								0.131	353.62	0.1
[P6,6,6,14][Cl]	Ge, R.; Hardacre, C.; Nancarrow, P.; Rooney, D. W. Thermal Conductivities of Ionic Liquids over the Temperature Range from 293 K to 353 K. J. Chem. Eng. Data 2007, 52, 1819.	transient hot-wire method	KD2 Pro Thermal Properties Analyzer (Labcell Ltd., UK).	less than ± 0.002 W m-1 K-1	Cytec	water < 800ppm, Cl < 5ppm	washed 5 to 6 times using distilled water and dried overnight at 70 °C under a high vacuum (0.1Pa)	0.161	293	0.1
								0.16	303	0.1
								0.159	313	0.1
								0.157	323	0.1
								0.157	333	0.1
								0.156	343	0.1
								0.155	353	0.1
[P4,4,4,1][MeSO4]	Ferreira, A. G. M.; Simões, P. N.; Ferreira, A. F.; Fonseca, M. A.; Oliveira, M. S. A.; Trino, A. S. M. Transport and Thermal Properties of Quaternary Phosphonium Ionic Liquids and IoNanofluids. J. Chem. Thermodyn. 2013, 64, 80.	transient hot-wire method	KD2 Pro (Decagon Devices)	less than ± 0.01W m-1 K-1	Cytec	water < 200ppm	washed several times using suitable solvents and dried at 343 K under a vacuum of about 1 Pa for several days	0.157	283.34	0.1
[P4,4,4,1][MeSO4]								0.156	293.28	0.1
[P4,4,4,1][MeSO4]								0.155	298.36	0.1
[P4,4,4,1][MeSO4]								0.155	303.45	0.1
[P4,4,4,1][MeSO4]								0.153	313.5	0.1
[P4,4,4,1][MeSO4]								0.153	323.6	0.1
[P4,4,4,1][MeSO4]								0.153	333.58	0.1
[P4,4,4,1][MeSO4]								0.153	343.61	0.1
[P4,4,4,1][MeSO4]								0.153	353.51	0.1
[C4mim][BF4]	Tomida, D.; Kenmochi, S.; Tsukada, T.; Yokoyama, C. Measurements of Thermal Conductivity of 1-Butyl-3-methylimidazolium Tetrafluoroborate at High Pressure. Heat Transfer-Asian Research 2007, 36, 361.	transient short-hot-wire method	self-prepared apparatus	0.021	synthesized	water = 221ppm, Cl = 421ppm	degassed and dried under vacuum at 343 K for 24h	0.169	294.7	0.1
								0.169	314.8	0.1
								0.168	334.9	0.1
[C6mim][BF4]	Nieto De Castro, C. A.; Lourenco, M. J. V.; Ribeiro, A. P. C.; Langa, E.; Vieira, S. I. C.; Goodrich, P.; Hardacre, C. Thermal Properties of Ionic Liquids and Ionanofluids of Imidazolium and Pyrrolidinium Liquids. J. Chem. Eng. Data 2010, 55, 653.	transient hot-wire method	KD2 Pro Thermal Properties Analyzer (Labcell Ltd., UK).	less than ± 0.005 W m-1 K-1	synthesized	water < 200ppm, Cl < 5ppm	washed using distilled water and dried while stirring overnight at 70°C under high vacuum (0.1 Pa)	0.158	293	0.1
								0.157	303	0.1
								0.156	313	0.1
								0.155	323	0.1
								0.153	333	0.1
								0.152	343	0.1
								0.151	353	0.1
	Tomida, D.; Kenmochi, S.; Tsukada, T.; Qiao, K.; Bao, Q. X.; Yokoyama, C. Viscosity and Thermal Conductivity of 1-Hexyl-3-methylimidazolium Tetrafluoroborate and 1-Octyl-3-methylimidazolium Tetrafluoroborate at Pressures up to 20 MPa. Int. J. Thermophys. 2012, 33, 959.	transient short-hot-wire method	self-prepared apparatus	0.024	synthesized	water = 90ppm, Cl < 18 ppm	degassed and dried under vacuum at 343 K for 24h	0.166	294.2	0.1
								0.165	314.3	0.1
								0.164	334.4	0.1
[C8mim][BF4]	Tomida, D.; Kenmochi, S.; Tsukada, T.; Qiao, K.; Bao, Q. X.; Yokoyama, C. Viscosity and Thermal Conductivity of 1-Hexyl-3-methylimidazolium Tetrafluoroborate and 1-Octyl-3-methylimidazolium Tetrafluoroborate at Pressures up to 20 MPa. Int. J. Thermophys. 2012, 33, 959.	transient short-hot-wire method	self-prepared apparatus	0.024	synthesized	water = 83ppm, Cl < 18 ppm	degassed and dried under vacuum at 343 K for 24h	0.164	294.2	0.1
								0.163	314.3	0.1
								0.16	334.4	0.1
[C4mim][PF6]	Nieto De Castro, C. A.; Lourenco, M. J. V.; Ribeiro, A. P. C.; Langa, E.; Vieira, S. I. C.; Goodrich, P.; Hardacre, C. Thermal Properties of Ionic Liquids and Ionanofluids of Imidazolium and Pyrrolidinium Liquids. J. Chem. Eng. Data 2010, 55, 653.	transient hot-wire method	KD2 Pro Thermal Properties Analyzer (Labcell Ltd., UK).	less than ± 0.005 W m-1 K-1	synthesized	water < 200ppm, Cl < 5ppm	washed using distilled water and dried while stirring overnight at 70°C under high vacuum (0.1 Pa)	0.145	293	0.1
								0.145	303	0.1
								0.145	313	0.1
								0.144	323	0.1
								0.143	333	0.1
								0.143	343	0.1
								0.143	353	0.1
	Tomida, D.; Kenmochi, S.; Tsukada, T.; Qiao, K.; Yokoyama, C. Thermal Conductivities of [bmim][PF6], [hmim][PF6], and [omim][PF6] from 294 to 335 K at Pressures up to 20 MPa. Int. J. Thermophys. 2007, 28, 1147.	transient short-hot-wire method	self-prepared apparatus	0.02	synthesized	water within a range of 70-90 ppm, Cl very minor	heated under vacuum at 343K for 48h	0.145	294.9	0.1
								0.145	315	0.1
								0.144	335.1	0.1
[C6mim][PF6]	Nieto De Castro, C. A.; Lourenco, M. J. V.; Ribeiro, A. P. C.; Langa, E.; Vieira, S. I. C.; Goodrich, P.; Hardacre, C. Thermal Properties of Ionic Liquids and Ionanofluids of Imidazolium and Pyrrolidinium Liquids. J. Chem. Eng. Data 2010, 55, 653.	transient hot-wire method	KD2 Pro Thermal Properties Analyzer (Labcell Ltd., UK).	less than ± 0.005 W m-1 K-1	synthesized	water < 200ppm, Cl < 5ppm	washed using distilled water and dried while stirring overnight at 70°C under high vacuum (0.1 Pa)	0.142	293	0.1
								0.141	303	0.1
								0.141	313	0.1
								0.139	323	0.1
								0.139	333	0.1
								0.138	343	0.1
								0.138	353	0.1
	Tomida, D.; Kenmochi, S.; Tsukada, T.; Qiao, K.; Yokoyama, C. Thermal Conductivities of [bmim][PF6], [hmim][PF6], and [omim][PF6] from 294 to 335 K at Pressures up to 20 MPa. Int. J. Thermophys. 2007, 28, 1147.	transient short-hot-wire method	self-prepared apparatus	0.02	synthesized	water within a range of 70-90 ppm, Cl very minor	heated under vacuum at 343K for 48h	0.145	294.1	0.1
								0.145	315.1	0.1
								0.144	335.2	0.1
[C8mim][PF6]	Tomida, D.; Kenmochi, S.; Tsukada, T.; Qiao, K.; Yokoyama, C. Thermal Conductivities of [bmim][PF6], [hmim][PF6], and [omim][PF6] from 294 to 335 K at Pressures up to 20 MPa. Int. J. Thermophys. 2007, 28, 1147.	transient short-hot-wire method	self-prepared apparatus	0.02	synthesized	water within a range of 70-90 ppm, Cl very minor	heated under vacuum at 343K for 48h	0.145	295.1	0.1
								0.145	315.1	0.1
								0.144	335.2	0.1
[C2mim][CH3COO]	Froba, A. P.; Rausch, M. H.; Krzeminski, K.; Assenbaum, D.; Wasserscheid, P.; Leipertz, A. Thermal Conductivity of Ionic Liquids: Measurement and Prediction. Int. J. Thermophys. 2010, 31, 2059.	parallel-plate method	stationary guarded parallelplate instrument	0.03	BASF AG, Germany	water = 9360ppm	dried at about 333.15 K for at least 4h on a vacuum line (0.5 mbar) with an oil-sealed vacuum pump and a liquid nitrogen trap	0.2137	273.15	0.1
								0.2124	283.15	0.1
								0.211	293.15	0.1
								0.2102	303.15	0.1
								0.2066	313.15	0.1
								0.2026	323.15	0.1
								0.2002	333.15	0.1
								0.1973	343.15	0.1
								0.1915	353.15	0.1
[C2mim][DCA]	Froba, A. P.; Rausch, M. H.; Krzeminski, K.; Assenbaum, D.; Wasserscheid, P.; Leipertz, A. Thermal Conductivity of Ionic Liquids: Measurement and Prediction. Int. J. Thermophys. 2010, 31, 2059.	parallel-plate method	stationary guarded parallelplate instrument	0.03	Solvent Innovation GmbH, Cologne, Germany	water = 1030ppm	dried at about 333.15 K for at least 4h on a vacuum line (0.5 mbar) with an oil-sealed vacuum pump and a liquid nitrogen trap	0.2053	273.15	0.1
								0.205	283.15	0.1
								0.2021	293.15	0.1
								0.2022	303.15	0.1
								0.1986	313.15	0.1
								0.1958	323.15	0.1
								0.1942	333.15	0.1
								0.1935	343.15	0.1
								0.1914	353.15	0.1
[C2mim][C(CN)3]	Froba, A. P.; Rausch, M. H.; Krzeminski, K.; Assenbaum, D.; Wasserscheid, P.; Leipertz, A. Thermal Conductivity of Ionic Liquids: Measurement and Prediction. Int. J. Thermophys. 2010, 31, 2059.	parallel-plate method	stationary guarded parallelplate instrument	0.03	Lonza Cologne AG, Germany	water = 555ppm	dried at about 333.15 K for at least 4h on a vacuum line (0.5 mbar) with an oil-sealed vacuum pump and a liquid nitrogen trap	0.1956	273.15	0.1
								0.1957	283.15	0.1
								0.193	293.15	0.1
								0.1918	303.15	0.1
								0.19	313.15	0.1
								0.1873	323.15	0.1
								0.1868	333.15	0.1
								0.1847	343.15	0.1
								0.1815	353.15	0.1
[C2mim][MeOHPO2]	Froba, A. P.; Rausch, M. H.; Krzeminski, K.; Assenbaum, D.; Wasserscheid, P.; Leipertz, A. Thermal Conductivity of Ionic Liquids: Measurement and Prediction. Int. J. Thermophys. 2010, 31, 2059.	parallel-plate method	stationary guarded parallelplate instrument	0.03	Solvent Innovation GmbH, Cologne, Germany	water = 232 ppm	dried at about 333.15 K for at least 4h on a vacuum line (0.5 mbar) with an oil-sealed vacuum pump and a liquid nitrogen trap	0.1941	273.15	0.1
								0.1948	283.15	0.1
								0.1914	293.15	0.1
								0.1959	303.15	0.1
								0.1915	313.15	0.1
								0.1906	323.15	0.1
								0.1908	333.15	0.1
								0.1917	343.15	0.1
								0.1902	353.15	0.1
[C4bim][NTf2]	Froba, A. P.; Rausch, M. H.; Krzeminski, K.; Assenbaum, D.; Wasserscheid, P.; Leipertz, A. Thermal Conductivity of Ionic Liquids: Measurement and Prediction. Int. J. Thermophys. 2010, 31, 2059.	parallel-plate method	stationary guarded parallelplate instrument	0.03	synthesized	water = 119 ppm	dried at about 333.15 K for at least 4h on a vacuum line (0.5 mbar) with an oil-sealed vacuum pump and a liquid nitrogen trap	0.1209	273.15	0.1
								0.1203	283.15	0.1
								0.1188	293.15	0.1
								0.1198	303.15	0.1
								0.1176	313.15	0.1
								0.1176	323.15	0.1
								0.1176	333.15	0.1
								0.1171	343.15	0.1
								0.1164	353.15	0.1
[N8,8,8,1][NTf2]	Froba, A. P.; Rausch, M. H.; Krzeminski, K.; Assenbaum, D.; Wasserscheid, P.; Leipertz, A. Thermal Conductivity of Ionic Liquids: Measurement and Prediction. Int. J. Thermophys. 2010, 31, 2059.	parallel-plate method	stationary guarded parallelplate instrument	0.03	synthesized	water = 781 ppm	dried at about 333.15 K for at least 4h on a vacuum line (0.5 mbar) with an oil-sealed vacuum pump and a liquid nitrogen trap	0.1314	273.15	0.1
								0.1291	283.15	0.1
								0.1299	293.15	0.1
								0.1283	303.15	0.1
								0.1266	313.15	0.1
								0.1247	323.15	0.1
								0.1244	333.15	0.1
								0.1242	343.15	0.1
								0.1248	353.15	0.1
[N4,4,4,1][Ser]	Gardas, R. L.; Ge, R.; Goodrich, P.; Hardacre, C.; Hussain, A.; Rooney, D. W. Thermophysical Properties of Amino Acid-Based Ionic Liquids. J. Chem. Eng. Data 2010, 55, 1505.	transient hot-wire method	KD2 Pro Thermal Properties Analyzer (Labcell Ltd., U.K.)	0.005 W m-1 K-1	synthesized	water = 41 ppm	dried under vacuum (0.1Pa) at 348K for at least 48h	0.169	298.15	0.1
								0.168	303.15	0.1
								0.167	313.15	0.1
								0.166	323.15	0.1
								0.165	333.15	0.1
								0.164	343.15	0.1
								0.163	353.15	0.1
[N4,4,4,1][Tau]	Gardas, R. L.; Ge, R.; Goodrich, P.; Hardacre, C.; Hussain, A.; Rooney, D. W. Thermophysical Properties of Amino Acid-Based Ionic Liquids. J. Chem. Eng. Data 2010, 55, 1505.	transient hot-wire method	KD2 Pro Thermal Properties Analyzer (Labcell Ltd., U.K.)	0.005 W m-1 K-1	synthesized	water = 48 ppm	dried under vacuum (0.1Pa) at 348K for at least 48h	0.161	298.15	0.1
								0.16	303.15	0.1
								0.159	313.15	0.1
								0.158	323.15	0.1
								0.157	333.15	0.1
								0.156	343.15	0.1
								0.155	353.15	0.1
[N4,4,4,1][Lys]	Gardas, R. L.; Ge, R.; Goodrich, P.; Hardacre, C.; Hussain, A.; Rooney, D. W. Thermophysical Properties of Amino Acid-Based Ionic Liquids. J. Chem. Eng. Data 2010, 55, 1505.	transient hot-wire method	KD2 Pro Thermal Properties Analyzer (Labcell Ltd., U.K.)	0.005 W m-1 K-1	synthesized	water = 43 ppm	dried under vacuum (0.1Pa) at 348K for at least 48h	0.171	298.15	0.1
								0.17	303.15	0.1
								0.169	313.15	0.1
								0.168	323.15	0.1
								0.167	333.15	0.1
								0.166	343.15	0.1
								0.165	353.15	0.1
[N4,4,4,1][Thr]	Gardas, R. L.; Ge, R.; Goodrich, P.; Hardacre, C.; Hussain, A.; Rooney, D. W. Thermophysical Properties of Amino Acid-Based Ionic Liquids. J. Chem. Eng. Data 2010, 55, 1505.	transient hot-wire method	KD2 Pro Thermal Properties Analyzer (Labcell Ltd., U.K.)	0.005 W m-1 K-1	synthesized	water = 49 ppm	dried under vacuum (0.1Pa) at 348K for at least 48h	0.16	298.15	0.1
								0.159	303.15	0.1
								0.158	313.15	0.1
								0.157	323.15	0.1
								0.156	333.15	0.1
								0.155	343.15	0.1
								0.154	353.15	0.1
[P4,4,4,4][Ser]	Gardas, R. L.; Ge, R.; Goodrich, P.; Hardacre, C.; Hussain, A.; Rooney, D. W. Thermophysical Properties of Amino Acid-Based Ionic Liquids. J. Chem. Eng. Data 2010, 55, 1505.	transient hot-wire method	KD2 Pro Thermal Properties Analyzer (Labcell Ltd., U.K.)	0.005 W m-1 K-1	synthesized	water = 53 ppm	dried under vacuum (0.1Pa) at 348K for at least 48h	0.161	298.15	0.1
								0.16	303.15	0.1
								0.159	313.15	0.1
								0.158	323.15	0.1
								0.157	333.15	0.1
								0.156	343.15	0.1
								0.155	353.15	0.1
[P4,4,4,4][Tau]	Gardas, R. L.; Ge, R.; Goodrich, P.; Hardacre, C.; Hussain, A.; Rooney, D. W. Thermophysical Properties of Amino Acid-Based Ionic Liquids. J. Chem. Eng. Data 2010, 55, 1505.	transient hot-wire method	KD2 Pro Thermal Properties Analyzer (Labcell Ltd., U.K.)	0.005 W m-1 K-1	synthesized	water = 64 ppm	dried under vacuum (0.1Pa) at 348K for at least 48h	0.16	298.15	0.1
								0.16	303.15	0.1
								0.159	313.15	0.1
								0.158	323.15	0.1
								0.157	333.15	0.1
								0.156	343.15	0.1
								0.155	353.15	0.1
[P4,4,4,4][Lys]	Gardas, R. L.; Ge, R.; Goodrich, P.; Hardacre, C.; Hussain, A.; Rooney, D. W. Thermophysical Properties of Amino Acid-Based Ionic Liquids. J. Chem. Eng. Data 2010, 55, 1505.	transient hot-wire method	KD2 Pro Thermal Properties Analyzer (Labcell Ltd., U.K.)	0.005 W m-1 K-1	synthesized	water = 51 ppm	dried under vacuum (0.1Pa) at 348K for at least 48h	0.163	298.15	0.1
								0.163	303.15	0.1
								0.162	313.15	0.1
								0.161	323.15	0.1
								0.16	333.15	0.1
								0.159	343.15	0.1
								0.158	353.15	0.1
[P4,4,4,4][Thr]	Gardas, R. L.; Ge, R.; Goodrich, P.; Hardacre, C.; Hussain, A.; Rooney, D. W. Thermophysical Properties of Amino Acid-Based Ionic Liquids. J. Chem. Eng. Data 2010, 55, 1505.	transient hot-wire method	KD2 Pro Thermal Properties Analyzer (Labcell Ltd., U.K.)	0.005 W m-1 K-1	synthesized	water = 50 ppm	dried under vacuum (0.1Pa) at 348K for at least 48h	0.156	298.15	0.1
								0.155	303.15	0.1
								0.154	313.15	0.1
								0.153	323.15	0.1
								0.152	333.15	0.1
								0.152	343.15	0.1
								0.151	353.15	0.1
[P4,4,4,4][Pro]	Gardas, R. L.; Ge, R.; Goodrich, P.; Hardacre, C.; Hussain, A.; Rooney, D. W. Thermophysical Properties of Amino Acid-Based Ionic Liquids. J. Chem. Eng. Data 2010, 55, 1505.	transient hot-wire method	KD2 Pro Thermal Properties Analyzer (Labcell Ltd., U.K.)	0.005 W m-1 K-1	synthesized	water = 51 ppm	dried under vacuum (0.1Pa) at 348K for at least 48h	0.154	298.15	0.1
								0.153	303.15	0.1
								0.152	313.15	0.1
								0.151	323.15	0.1
								0.15	333.15	0.1
								0.149	343.15	0.1
								0.148	353.15	0.1
[P4,4,4,4][Val]	Gardas, R. L.; Ge, R.; Goodrich, P.; Hardacre, C.; Hussain, A.; Rooney, D. W. Thermophysical Properties of Amino Acid-Based Ionic Liquids. J. Chem. Eng. Data 2010, 55, 1505.	transient hot-wire method	KD2 Pro Thermal Properties Analyzer (Labcell Ltd., U.K.)	0.005 W m-1 K-1	synthesized	water = 45 ppm	dried under vacuum (0.1Pa) at 348K for at least 48h	0.157	313.15	0.1
								0.156	323.15	0.1
								0.155	333.15	0.1
								0.154	343.15	0.1
								0.153	353.15	0.1
[P4,4,4,4][Cys]	Gardas, R. L.; Ge, R.; Goodrich, P.; Hardacre, C.; Hussain, A.; Rooney, D. W. Thermophysical Properties of Amino Acid-Based Ionic Liquids. J. Chem. Eng. Data 2010, 55, 1505.	transient hot-wire method	KD2 Pro Thermal Properties Analyzer (Labcell Ltd., U.K.)	0.005 W m-1 K-1	synthesized	water = 50 ppm	dried under vacuum (0.1Pa) at 348K for at least 48h	0.152	298.15	0.1
								0.151	303.15	0.1
								0.15	313.15	0.1
								0.149	323.15	0.1
								0.148	333.15	0.1
								0.147	343.15	0.1
								0.146	353.15	0.1
[C4mim][NPf2]	Liu, H.; Maginn, E.; Visser, A. E.; Bridges, N. J.; Fox, E. B. Thermal and Transport Properties of Six Ionic Liquids: An Experimental and Molecular Dynamics Study. Ind. Eng. Chem. Res. 2012, 51, 7242.	transient hot-wire method	Decagon KD2 Thermal Properties Analyzer	-	synthesized	no residual chloride	diluted	0.110964	296.141	0.1
								0.115515	314.346	0.1
								0.118512	332.359	0.1
[N4,1,1,1][ NTf2]	Liu, H.; Maginn, E.; Visser, A. E.; Bridges, N. J.; Fox, E. B. Thermal and Transport Properties of Six Ionic Liquids: An Experimental and Molecular Dynamics Study. Ind. Eng. Chem. Res. 2012, 51, 7242.	transient hot-wire method	Decagon KD2 Thermal Properties Analyzer	-	Ionic Liquid Technologies, Inc.	no residual chloride	diluted	0.124712	296.692	0.1
								0.123224	312.717	0.1
								0.118008	332.209	0.1
[N4COOH,1,1,1][ NTf2]	Liu, H.; Maginn, E.; Visser, A. E.; Bridges, N. J.; Fox, E. B. Thermal and Transport Properties of Six Ionic Liquids: An Experimental and Molecular Dynamics Study. Ind. Eng. Chem. Res. 2012, 51, 7242.	transient hot-wire method	Decagon KD2 Thermal Properties Analyzer	-	Ionic Liquid Technologies, Inc.	no residual chloride	diluted	0.134992	295.698	0.1
								0.141646	313.112	0.1
								0.141389	331.026	0.1
[C4mmim][ NTf2]	Liu, H.; Maginn, E.; Visser, A. E.; Bridges, N. J.; Fox, E. B. Thermal and Transport Properties of Six Ionic Liquids: An Experimental and Molecular Dynamics Study. Ind. Eng. Chem. Res. 2012, 51, 7242.	transient hot-wire method	Decagon KD2 Thermal Properties Analyzer	-	Ionic Liquid Technologies, Inc.	no residual chloride	diluted	0.126036	296.176	0.1
								0.126276	313.352	0.1
								0.127766	333.159	0.1
[C4py][BF4]	Tomida, D.; Kenmochi, S.; Qiao, K.; Tsukada, T.; Yokoyama, C. Densities and Thermal Conductivities of N-alkylpyridinium Tetrafluoroborates at High Pressure. Fluid Phase Equilibr. 2013, 340, 31.	transient short-hot-wire method	self-prepared apparatus	0.026	synthesized	water = 102ppm, Cl < 18 ppm	degassed and dried under vacuum for 24 h at 343 K	0.171	294.2	0.1
								0.17	314.3	0.1
								0.169	334.3	0.1
[C6py][BF4]	Tomida, D.; Kenmochi, S.; Qiao, K.; Tsukada, T.; Yokoyama, C. Densities and Thermal Conductivities of N-alkylpyridinium Tetrafluoroborates at High Pressure. Fluid Phase Equilibr. 2013, 340, 31.	transient short-hot-wire method	self-prepared apparatus	0.026	synthesized	water = 78ppm, Cl < 18 ppm	degassed and dried under vacuum for 24 h at 343 K	0.163	294.2	0.1
								0.163	314.3	0.1
								0.161	334.3	0.1
[C8py][BF4]	Tomida, D.; Kenmochi, S.; Qiao, K.; Tsukada, T.; Yokoyama, C. Densities and Thermal Conductivities of N-alkylpyridinium Tetrafluoroborates at High Pressure. Fluid Phase Equilibr. 2013, 340, 31.	transient short-hot-wire method	self-prepared apparatus	0.026	synthesized	water = 83ppm, Cl < 18 ppm	degassed and dried under vacuum for 24 h at 343 K	0.16	294.2	0.1
								0.16	314.3	0.1
								0.158	334.3	0.1

## Sheet: Table S3
examples of calculating 18 topological indexes for [C2mim][NTf2] and [P4,4,4,4][Tau]
first:	[C2mim][NTf2]
step 1	label the atoms of cation
step 2	get the distance matrix D of the cation
0	1	2	2	1	3	1	2
1	0	1	2	2	2	2	3
2	1	0	1	2	1	3	4
2	2	1	0	1	2	3	4
1	2	2	1	0	3	2	3
3	2	1	2	3	0	4	5
1	2	3	3	2	4	0	1
2	3	4	4	3	5	1	0
Step 3	list van der Waal radius of each atom in a row just next to the distance matrix to form a combined matrix D’																		list atom electronegativity of each atom in a row just next to the distance matrix to form a combined matrix D’																			list atom weight of each atom in a row just next to the distance matrix to form a combined matrix D’
0	1	2	2	1	3	1	2	1.5											0	1	2	2	1	3	1	2	3.04											0	1	2	2	1	3	1	2	14.01
1	0	1	2	2	2	2	3	1.8											1	0	1	2	2	2	2	3	2.55											1	0	1	2	2	2	2	3	12.01
2	1	0	1	2	1	3	4	1.5											2	1	0	1	2	1	3	4	3.04											2	1	0	1	2	1	3	4	14.01
2	2	1	0	1	2	3	4	1.8											2	2	1	0	1	2	3	4	2.55											2	2	1	0	1	2	3	4	12.01
1	2	2	1	0	3	2	3	1.8											1	2	2	1	0	3	2	3	2.55											1	2	2	1	0	3	2	3	12.01
3	2	1	2	3	0	4	5	1.8											3	2	1	2	3	0	4	5	2.55											3	2	1	2	3	0	4	5	12.01
1	2	3	3	2	4	0	1	1.8											1	2	3	3	2	4	0	1	2.55											1	2	3	3	2	4	0	1	12.01
2	3	4	4	3	5	1	0	1.8											2	3	4	4	3	5	1	0	2.55											2	3	4	4	3	5	1	0	12.01
step 4	obtain matrix M																		obtain matrix M																			obtain matrix M
26.25	24.7	21.25	24.7	27.7	27.7	32.7	40.7												33.2416	29.752	28.2416	29.752	32.752	32.752	37.752	45.752												220.28	190.26	215.28	190.26	193.26	193.26	198.26	206.26
24.7	30.24	30.7	30.24	27.24	40.24	28.24	35.24												29.752	33.5025	35.752	33.5025	30.5025	43.5025	31.5025	38.5025												190.26	171.24	196.26	171.24	168.24	181.24	169.24	176.24
21.25	30.7	38.25	37.7	28.7	50.7	21.7	27.7												28.2416	35.752	45.2416	42.752	33.752	55.752	26.752	32.752												215.28	196.26	232.28	203.26	194.26	216.26	187.26	193.26
24.7	30.24	37.7	42.24	35.24	49.24	26.24	33.24												29.752	33.5025	42.752	45.5025	38.5025	52.5025	29.5025	36.5025												190.26	171.24	203.26	183.24	176.24	190.24	167.24	174.24
27.7	27.24	28.7	35.24	35.24	37.24	32.24	40.24												32.752	30.5025	33.752	38.5025	38.5025	40.5025	35.5025	43.5025												193.26	168.24	194.26	176.24	176.24	178.24	173.24	181.24
27.7	40.24	50.7	49.24	37.24	71.24	30.24	40.24												32.752	43.5025	55.752	52.5025	40.5025	74.5025	33.5025	43.5025												193.26	181.24	216.26	190.24	178.24	212.24	171.24	181.24
32.7	28.24	21.7	26.24	32.24	30.24	47.24	61.24												37.752	31.5025	26.752	29.5025	35.5025	33.5025	50.5025	64.5025												198.26	169.24	187.26	167.24	173.24	171.24	188.24	202.24
40.7	35.24	27.7	33.24	40.24	40.24	61.24	83.24												45.752	38.5025	32.752	36.5025	43.5025	43.5025	64.5025	86.5025												206.26	176.24	193.26	174.24	181.24	181.24	202.24	224.24
step 5	get the eigenvalues (ei) of M																		get the eigenvalues (ei) of M																			get the eigenvalues (ei) of M
0.125123																			0.124848																			0.124841
0.159304																			0.385186																			0.464205
0.575148																			0.641537																			0.894168
1.31892																			1.34898																			1.43567
5.62979																			6.51555																			8.2696
11.3808																			11.9332																			17.0801
64.889																			64.9735																			65.2706
289.862																			321.575																			1514.46
step 6	get the biggest eigenvalues (eca-max,r)																		get the biggest eigenvalues (eca-max,e)																			get the biggest eigenvalues (eca-max,w)
289.862																			321.575																			1514.46
step 7	label the atoms of anion
step 8	get the distance matrix D of the anion
0	1	2	2	2	3	3	3	1	2	2	2	3	3	3
1	0	1	1	1	2	2	2	2	3	3	3	4	4	4
2	1	0	2	2	3	3	3	3	4	4	4	5	5	5
2	1	2	0	2	3	3	3	3	4	4	4	5	5	5
2	1	2	2	0	1	1	1	3	4	4	4	5	5	5
3	2	3	3	1	0	2	2	4	5	5	5	6	6	6
3	2	3	3	1	2	0	2	4	5	5	5	6	6	6
3	2	3	3	1	2	2	0	4	5	5	5	6	6	6
1	2	3	3	3	4	4	4	0	1	1	1	2	2	2
2	3	4	4	4	5	5	5	1	0	2	2	3	3	3
2	3	4	4	4	5	5	5	1	2	0	2	3	3	3
2	3	4	4	4	5	5	5	1	2	2	0	1	1	1
3	4	5	5	5	6	6	6	2	3	3	1	0	2	2
3	4	5	5	5	6	6	6	2	3	3	1	2	0	2
3	4	5	5	5	6	6	6	2	3	3	1	2	2	0
Step 9	list van der Waal radius of each atom in a row just next to the distance matrix to form a combined matrix D’																		list atom electronegativity of each atom in a row just next to the distance matrix to form a combined matrix D’																			list atom weight of each atom in a row just next to the distance matrix to form a combined matrix D’
0	1	2	2	2	3	3	3	1	2	2	2	3	3	3	1.5				0	1	2	2	2	3	3	3	1	2	2	2	3	3	3	3.04				0	1	2	2	2	3	3	3	1	2	2	2
1	0	1	1	1	2	2	2	2	3	3	3	4	4	4	1.85				1	0	1	1	1	2	2	2	2	3	3	3	4	4	4	2.58				1	0	1	1	1	2	2	2	2	3	3	3
2	1	0	2	2	3	3	3	3	4	4	4	5	5	5	1.4				2	1	0	2	2	3	3	3	3	4	4	4	5	5	5	3.44				2	1	0	2	2	3	3	3	3	4	4	4
2	1	2	0	2	3	3	3	3	4	4	4	5	5	5	1.4				2	1	2	0	2	3	3	3	3	4	4	4	5	5	5	3.44				2	1	2	0	2	3	3	3	3	4	4	4
2	1	2	2	0	1	1	1	3	4	4	4	5	5	5	1.8				2	1	2	2	0	1	1	1	3	4	4	4	5	5	5	2.55				2	1	2	2	0	1	1	1	3	4	4	4
3	2	3	3	1	0	2	2	4	5	5	5	6	6	6	1.35				3	2	3	3	1	0	2	2	4	5	5	5	6	6	6	3.98				3	2	3	3	1	0	2	2	4	5	5	5
3	2	3	3	1	2	0	2	4	5	5	5	6	6	6	1.35				3	2	3	3	1	2	0	2	4	5	5	5	6	6	6	3.98				3	2	3	3	1	2	0	2	4	5	5	5
3	2	3	3	1	2	2	0	4	5	5	5	6	6	6	1.35				3	2	3	3	1	2	2	0	4	5	5	5	6	6	6	3.98				3	2	3	3	1	2	2	0	4	5	5	5
1	2	3	3	3	4	4	4	0	1	1	1	2	2	2	1.85				1	2	3	3	3	4	4	4	0	1	1	1	2	2	2	2.58				1	2	3	3	3	4	4	4	0	1	1	1
2	3	4	4	4	5	5	5	1	0	2	2	3	3	3	1.4				2	3	4	4	4	5	5	5	1	0	2	2	3	3	3	3.44				2	3	4	4	4	5	5	5	1	0	2	2
2	3	4	4	4	5	5	5	1	2	0	2	3	3	3	1.4				2	3	4	4	4	5	5	5	1	2	0	2	3	3	3	3.44				2	3	4	4	4	5	5	5	1	2	0	2
2	3	4	4	4	5	5	5	1	2	2	0	1	1	1	1.8				2	3	4	4	4	5	5	5	1	2	2	0	1	1	1	2.55				2	3	4	4	4	5	5	5	1	2	2	0
3	4	5	5	5	6	6	6	2	3	3	1	0	2	2	1.35				3	4	5	5	5	6	6	6	2	3	3	1	0	2	2	3.98				3	4	5	5	5	6	6	6	2	3	3	1
3	4	5	5	5	6	6	6	2	3	3	1	2	0	2	1.35				3	4	5	5	5	6	6	6	2	3	3	1	2	0	2	3.98				3	4	5	5	5	6	6	6	2	3	3	1
3	4	5	5	5	6	6	6	2	3	3	1	2	2	0	1.35				3	4	5	5	5	6	6	6	2	3	3	1	2	2	0	3.98				3	4	5	5	5	6	6	6	2	3	3	1
step 10	obtain matrix M																		obtain matrix M																			obtain matrix M
82.25	82.775	110.1	110.1	92.7	118.025	118.025	118.025	82.775	110.1	110.1	92.7	118.025	118.025	118.025					89.2416	87.8432	118.458	118.458	97.752	128.099	128.099	128.099	87.8432	118.458	118.458	97.752	128.099	128.099	128.099					276.28	529.301	332.16	332.16	258.26	382.19	382.19	382.19	529.301	332.16	332.16	258.26
82.775	98.4225	128.59	128.59	117.33	145.498	145.498	145.498	70.4225	96.59	96.59	73.33	97.4975	97.4975	97.4975					87.8432	101.656	134.875	134.875	120.579	153.268	153.268	153.268	73.6564	102.875	102.875	76.579	105.268	105.268	105.268					529.301	1123.48	639.12	639.12	499.161	752.33	752.33	752.33	1095.48	607.12	607.12	455.161
110.1	128.59	173.96	169.96	152.52	191.89	191.89	191.89	96.59	133.96	133.96	104.52	139.89	139.89	139.89					118.458	134.875	183.834	179.834	158.772	203.691	203.691	203.691	102.875	143.834	143.834	110.772	151.691	151.691	151.691					332.16	639.12	428	424	342.16	494	494	494	607.12	388	388	294.16
110.1	128.59	169.96	173.96	152.52	191.89	191.89	191.89	96.59	133.96	133.96	104.52	139.89	139.89	139.89					118.458	134.875	179.834	183.834	158.772	203.691	203.691	203.691	102.875	143.834	143.834	110.772	151.691	151.691	151.691					332.16	639.12	424	428	342.16	494	494	494	607.12	388	388	294.16
92.7	117.33	152.52	152.52	151.24	188.43	188.43	188.43	73.33	104.52	104.52	75.24	104.43	104.43	104.43					97.752	120.579	158.772	158.772	154.502	196.149	196.149	196.149	76.579	110.772	110.772	78.5025	112.149	112.149	112.149					258.26	499.161	342.16	342.16	292.24	414.19	414.19	414.19	455.161	294.16	294.16	216.24
118.025	145.498	191.89	191.89	188.43	240.822	236.822	236.822	97.4975	139.89	139.89	104.43	144.822	144.822	144.822					128.099	153.268	203.691	203.691	196.149	254.84	250.84	250.84	105.268	151.691	151.691	112.149	158.84	158.84	158.84					382.19	752.33	494	494	414.19	600	596	596	704.33	442	442	330.19
118.025	145.498	191.89	191.89	188.43	236.822	240.822	236.822	97.4975	139.89	139.89	104.43	144.822	144.822	144.822					128.099	153.268	203.691	203.691	196.149	250.84	254.84	250.84	105.268	151.691	151.691	112.149	158.84	158.84	158.84					382.19	752.33	494	494	414.19	596	600	596	704.33	442	442	330.19
118.025	145.498	191.89	191.89	188.43	236.822	236.822	240.822	97.4975	139.89	139.89	104.43	144.822	144.822	144.822					128.099	153.268	203.691	203.691	196.149	250.84	250.84	254.84	105.268	151.691	151.691	112.149	158.84	158.84	158.84					382.19	752.33	494	494	414.19	596	596	600	704.33	442	442	330.19
82.775	70.4225	96.59	96.59	73.33	97.4975	97.4975	97.4975	98.4225	128.59	128.59	117.33	145.498	145.498	145.498					87.8432	73.6564	102.875	102.875	76.579	105.268	105.268	105.268	101.656	134.875	134.875	120.579	153.268	153.268	153.268					529.301	1095.48	607.12	607.12	455.161	704.33	704.33	704.33	1123.48	639.12	639.12	499.161
110.1	96.59	133.96	133.96	104.52	139.89	139.89	139.89	128.59	173.96	169.96	152.52	191.89	191.89	191.89					118.458	102.875	143.834	143.834	110.772	151.691	151.691	151.691	134.875	183.834	179.834	158.772	203.691	203.691	203.691					332.16	607.12	388	388	294.16	442	442	442	639.12	428	424	342.16
110.1	96.59	133.96	133.96	104.52	139.89	139.89	139.89	128.59	169.96	173.96	152.52	191.89	191.89	191.89					118.458	102.875	143.834	143.834	110.772	151.691	151.691	151.691	134.875	179.834	183.834	158.772	203.691	203.691	203.691					332.16	607.12	388	388	294.16	442	442	442	639.12	424	428	342.16
92.7	73.33	104.52	104.52	75.24	104.43	104.43	104.43	117.33	152.52	152.52	151.24	188.43	188.43	188.43					97.752	76.579	110.772	110.772	78.5025	112.149	112.149	112.149	120.579	158.772	158.772	154.502	196.149	196.149	196.149					258.26	455.161	294.16	294.16	216.24	330.19	330.19	330.19	499.161	342.16	342.16	292.24
118.025	97.4975	139.89	139.89	104.43	144.822	144.822	144.822	145.498	191.89	191.89	188.43	240.822	236.822	236.822					128.099	105.268	151.691	151.691	112.149	158.84	158.84	158.84	153.268	203.691	203.691	196.149	254.84	250.84	250.84					382.19	704.33	442	442	330.19	504	504	504	752.33	494	494	414.19
118.025	97.4975	139.89	139.89	104.43	144.822	144.822	144.822	145.498	191.89	191.89	188.43	236.822	240.822	236.822					128.099	105.268	151.691	151.691	112.149	158.84	158.84	158.84	153.268	203.691	203.691	196.149	250.84	254.84	250.84					382.19	704.33	442	442	330.19	504	504	504	752.33	494	494	414.19
118.025	97.4975	139.89	139.89	104.43	144.822	144.822	144.822	145.498	191.89	191.89	188.43	236.822	236.822	240.822					128.099	105.268	151.691	151.691	112.149	158.84	158.84	158.84	153.268	203.691	203.691	196.149	250.84	250.84	254.84					382.19	704.33	442	442	330.19	504	504	504	752.33	494	494	414.19
step 11	get the eigenvalues (ei) of M																		get the eigenvalues (ei) of M																			get the eigenvalues (ei) of M
0.119663																			0.129632																			0.129632
0.129632																			0.157313																			0.268575
0.268575																			0.268575																			0.431458
0.901514																			1.04578																			2.43357
4																			3.14137																			4
4																			4																			4
4																			4																			4
4																			4																			4
4																			4																			4
4																			4																			4
4.46891																			4																			16.5979
16.5979																			16.5979																			27.7841
33.9211																			33.2119																			222.599
443.004																			443.004																			443.004
2198.94																			2344.38																			7682.48
step 12	get the biggest eigenvalues (ean-max,r)																		get the biggest eigenvalues (ean-max,e)																			get the biggest eigenvalues (ean-max,w)
2198.94																			2344.38																			7682.48
step 13	get the interaction between cation and anion eca-an,r																		get the interaction between cation and anion eca-an,e																			get the interaction between cation and anion eca-an,w
55.6443																			57.2139																			100.139
finally we get 18 topological indexes for [C2mim][NTf2]
eca-max,r	ean-max,r	eca-an,r	eca-max,e	ean-max,e	eca-an,e	eca-max,w	ean-max,w	eca-an,w	eca-max,h	ean-max,h	eca-an,h	eca-max,s	ean-max,s	eca-an,s	eca-max,o	ean-max,o	eca-an,o
289.862	2198.94	55.6443	321.575	2344.38	57.2139	1514.46	7682.48	100.139	285.602	2167.13	55.3444	297.563	2231.79	56.0357	407.03	2727.4	61.2454
second:	[P4,4,4,4][Tau]
step 1	label the atoms of cation
step 2	get the distance matrix D of the cation
0	1	2	3	4	1	2	3	4	1	2	3	4	1	2	3	4
1	0	1	2	3	2	3	4	5	2	3	4	5	2	3	4	5
2	1	0	1	2	3	4	5	6	3	4	5	6	3	4	5	6
3	2	1	0	1	4	5	6	7	4	5	6	7	4	5	6	7
4	3	2	1	0	5	6	7	8	5	6	7	8	5	6	7	8
1	2	3	4	5	0	1	2	3	2	3	4	5	2	3	4	5
2	3	4	5	6	1	0	1	2	3	4	5	6	3	4	5	6
3	4	5	6	7	2	1	0	1	4	5	6	7	4	5	6	7
4	5	6	7	8	3	2	1	0	5	6	7	8	5	6	7	8
1	2	3	4	5	2	3	4	5	0	1	2	3	2	3	4	5
2	3	4	5	6	3	4	5	6	1	0	1	2	3	4	5	6
3	4	5	6	7	4	5	6	7	2	1	0	1	4	5	6	7
4	5	6	7	8	5	6	7	8	3	2	1	0	5	6	7	8
1	2	3	4	5	2	3	4	5	2	3	4	5	0	1	2	3
2	3	4	5	6	3	4	5	6	3	4	5	6	1	0	1	2
3	4	5	6	7	4	5	6	7	4	5	6	7	2	1	0	1
4	5	6	7	8	5	6	7	8	5	6	7	8	3	2	1	0
Step 3	list van der Waal radius of each atom in a row just next to the distance matrix to form a combined matrix D’																		list atom electronegativity of each atom in a row just next to the distance matrix to form a combined matrix D’																			list atom weight of each atom in a row just next to the distance matrix to form a combined matrix D’
0	1	2	3	4	1	2	3	4	1	2	3	4	1	2	3	4	1.9		0	1	2	3	4	1	2	3	4	1	2	3	4	1	2	3	4	2.19		0	1	2	3	4	1	2	3	4	1	2	3
1	0	1	2	3	2	3	4	5	2	3	4	5	2	3	4	5	1.8		1	0	1	2	3	2	3	4	5	2	3	4	5	2	3	4	5	2.55		1	0	1	2	3	2	3	4	5	2	3	4
2	1	0	1	2	3	4	5	6	3	4	5	6	3	4	5	6	1.8		2	1	0	1	2	3	4	5	6	3	4	5	6	3	4	5	6	2.55		2	1	0	1	2	3	4	5	6	3	4	5
3	2	1	0	1	4	5	6	7	4	5	6	7	4	5	6	7	1.8		3	2	1	0	1	4	5	6	7	4	5	6	7	4	5	6	7	2.55		3	2	1	0	1	4	5	6	7	4	5	6
4	3	2	1	0	5	6	7	8	5	6	7	8	5	6	7	8	1.8		4	3	2	1	0	5	6	7	8	5	6	7	8	5	6	7	8	2.55		4	3	2	1	0	5	6	7	8	5	6	7
1	2	3	4	5	0	1	2	3	2	3	4	5	2	3	4	5	1.8		1	2	3	4	5	0	1	2	3	2	3	4	5	2	3	4	5	2.55		1	2	3	4	5	0	1	2	3	2	3	4
2	3	4	5	6	1	0	1	2	3	4	5	6	3	4	5	6	1.8		2	3	4	5	6	1	0	1	2	3	4	5	6	3	4	5	6	2.55		2	3	4	5	6	1	0	1	2	3	4	5
3	4	5	6	7	2	1	0	1	4	5	6	7	4	5	6	7	1.8		3	4	5	6	7	2	1	0	1	4	5	6	7	4	5	6	7	2.55		3	4	5	6	7	2	1	0	1	4	5	6
4	5	6	7	8	3	2	1	0	5	6	7	8	5	6	7	8	1.8		4	5	6	7	8	3	2	1	0	5	6	7	8	5	6	7	8	2.55		4	5	6	7	8	3	2	1	0	5	6	7
1	2	3	4	5	2	3	4	5	0	1	2	3	2	3	4	5	1.8		1	2	3	4	5	2	3	4	5	0	1	2	3	2	3	4	5	2.55		1	2	3	4	5	2	3	4	5	0	1	2
2	3	4	5	6	3	4	5	6	1	0	1	2	3	4	5	6	1.8		2	3	4	5	6	3	4	5	6	1	0	1	2	3	4	5	6	2.55		2	3	4	5	6	3	4	5	6	1	0	1
3	4	5	6	7	4	5	6	7	2	1	0	1	4	5	6	7	1.8		3	4	5	6	7	4	5	6	7	2	1	0	1	4	5	6	7	2.55		3	4	5	6	7	4	5	6	7	2	1	0
4	5	6	7	8	5	6	7	8	3	2	1	0	5	6	7	8	1.8		4	5	6	7	8	5	6	7	8	3	2	1	0	5	6	7	8	2.55		4	5	6	7	8	5	6	7	8	3	2	1
1	2	3	4	5	2	3	4	5	2	3	4	5	0	1	2	3	1.8		1	2	3	4	5	2	3	4	5	2	3	4	5	0	1	2	3	2.55		1	2	3	4	5	2	3	4	5	2	3	4
2	3	4	5	6	3	4	5	6	3	4	5	6	1	0	1	2	1.8		2	3	4	5	6	3	4	5	6	3	4	5	6	1	0	1	2	2.55		2	3	4	5	6	3	4	5	6	3	4	5
3	4	5	6	7	4	5	6	7	4	5	6	7	2	1	0	1	1.8		3	4	5	6	7	4	5	6	7	4	5	6	7	2	1	0	1	2.55		3	4	5	6	7	4	5	6	7	4	5	6
4	5	6	7	8	5	6	7	8	5	6	7	8	3	2	1	0	1.8		4	5	6	7	8	5	6	7	8	5	6	7	8	3	2	1	0	2.55		4	5	6	7	8	5	6	7	8	5	6	7
step 4	obtain matrix M																		obtain matrix M																			obtain matrix M
123.61	143.42	165.42	191.42	223.42	143.42	165.42	191.42	223.42	143.42	165.42	191.42	223.42	143.42	165.42	191.42	223.42			124.796	145.584	167.584	193.584	225.584	145.584	167.584	193.584	225.584	145.584	167.584	193.584	225.584	145.584	167.584	193.584	225.584			1079.14	511.95	533.95	559.95	591.95	511.95	533.95	559.95	591.95	511.95	533.95	559.95
143.42	180.24	217.24	256.24	299.24	164.24	189.24	220.24	259.24	164.24	189.24	220.24	259.24	164.24	189.24	220.24	259.24			145.584	183.502	220.502	259.502	302.502	167.502	192.502	223.502	262.502	167.502	192.502	223.502	262.502	167.502	192.502	223.502	262.502			511.95	321.24	358.24	397.24	440.24	305.24	330.24	361.24	400.24	305.24	330.24	361.24
165.42	217.24	271.24	325.24	381.24	189.24	219.24	257.24	305.24	189.24	219.24	257.24	305.24	189.24	219.24	257.24	305.24			167.584	220.502	274.502	328.502	384.502	192.502	222.502	260.502	308.502	192.502	222.502	260.502	308.502	192.502	222.502	260.502	308.502			533.95	358.24	412.24	466.24	522.24	330.24	360.24	398.24	446.24	330.24	360.24	398.24
191.42	256.24	325.24	396.24	467.24	220.24	257.24	304.24	363.24	220.24	257.24	304.24	363.24	220.24	257.24	304.24	363.24			193.584	259.502	328.502	399.502	470.502	223.502	260.502	307.502	366.502	223.502	260.502	307.502	366.502	223.502	260.502	307.502	366.502			559.95	397.24	466.24	537.24	608.24	361.24	398.24	445.24	504.24	361.24	398.24	445.24
223.42	299.24	381.24	467.24	555.24	259.24	305.24	363.24	435.24	259.24	305.24	363.24	435.24	259.24	305.24	363.24	435.24			225.584	302.502	384.502	470.502	558.503	262.502	308.502	366.502	438.502	262.502	308.502	366.502	438.502	262.502	308.502	366.502	438.502			591.95	440.24	522.24	608.24	696.24	400.24	446.24	504.24	576.24	400.24	446.24	504.24
143.42	164.24	189.24	220.24	259.24	180.24	217.24	256.24	299.24	164.24	189.24	220.24	259.24	164.24	189.24	220.24	259.24			145.584	167.502	192.502	223.502	262.502	183.502	220.502	259.502	302.502	167.502	192.502	223.502	262.502	167.502	192.502	223.502	262.502			511.95	305.24	330.24	361.24	400.24	321.24	358.24	397.24	440.24	305.24	330.24	361.24
165.42	189.24	219.24	257.24	305.24	217.24	271.24	325.24	381.24	189.24	219.24	257.24	305.24	189.24	219.24	257.24	305.24			167.584	192.502	222.502	260.502	308.502	220.502	274.502	328.502	384.502	192.502	222.502	260.502	308.502	192.502	222.502	260.502	308.502			533.95	330.24	360.24	398.24	446.24	358.24	412.24	466.24	522.24	330.24	360.24	398.24
191.42	220.24	257.24	304.24	363.24	256.24	325.24	396.24	467.24	220.24	257.24	304.24	363.24	220.24	257.24	304.24	363.24			193.584	223.502	260.502	307.502	366.502	259.502	328.502	399.502	470.502	223.502	260.502	307.502	366.502	223.502	260.502	307.502	366.502			559.95	361.24	398.24	445.24	504.24	397.24	466.24	537.24	608.24	361.24	398.24	445.24
223.42	259.24	305.24	363.24	435.24	299.24	381.24	467.24	555.24	259.24	305.24	363.24	435.24	259.24	305.24	363.24	435.24			225.584	262.502	308.502	366.502	438.502	302.502	384.502	470.502	558.503	262.502	308.502	366.502	438.502	262.502	308.502	366.502	438.502			591.95	400.24	446.24	504.24	576.24	440.24	522.24	608.24	696.24	400.24	446.24	504.24
143.42	164.24	189.24	220.24	259.24	164.24	189.24	220.24	259.24	180.24	217.24	256.24	299.24	164.24	189.24	220.24	259.24			145.584	167.502	192.502	223.502	262.502	167.502	192.502	223.502	262.502	183.502	220.502	259.502	302.502	167.502	192.502	223.502	262.502			511.95	305.24	330.24	361.24	400.24	305.24	330.24	361.24	400.24	321.24	358.24	397.24
165.42	189.24	219.24	257.24	305.24	189.24	219.24	257.24	305.24	217.24	271.24	325.24	381.24	189.24	219.24	257.24	305.24			167.584	192.502	222.502	260.502	308.502	192.502	222.502	260.502	308.502	220.502	274.502	328.502	384.502	192.502	222.502	260.502	308.502			533.95	330.24	360.24	398.24	446.24	330.24	360.24	398.24	446.24	358.24	412.24	466.24
191.42	220.24	257.24	304.24	363.24	220.24	257.24	304.24	363.24	256.24	325.24	396.24	467.24	220.24	257.24	304.24	363.24			193.584	223.502	260.502	307.502	366.502	223.502	260.502	307.502	366.502	259.502	328.502	399.502	470.502	223.502	260.502	307.502	366.502			559.95	361.24	398.24	445.24	504.24	361.24	398.24	445.24	504.24	397.24	466.24	537.24
223.42	259.24	305.24	363.24	435.24	259.24	305.24	363.24	435.24	299.24	381.24	467.24	555.24	259.24	305.24	363.24	435.24			225.584	262.502	308.502	366.502	438.502	262.502	308.502	366.502	438.502	302.502	384.502	470.502	558.503	262.502	308.502	366.502	438.502			591.95	400.24	446.24	504.24	576.24	400.24	446.24	504.24	576.24	440.24	522.24	608.24
143.42	164.24	189.24	220.24	259.24	164.24	189.24	220.24	259.24	164.24	189.24	220.24	259.24	180.24	217.24	256.24	299.24			145.584	167.502	192.502	223.502	262.502	167.502	192.502	223.502	262.502	167.502	192.502	223.502	262.502	183.502	220.502	259.502	302.502			511.95	305.24	330.24	361.24	400.24	305.24	330.24	361.24	400.24	305.24	330.24	361.24
165.42	189.24	219.24	257.24	305.24	189.24	219.24	257.24	305.24	189.24	219.24	257.24	305.24	217.24	271.24	325.24	381.24			167.584	192.502	222.502	260.502	308.502	192.502	222.502	260.502	308.502	192.502	222.502	260.502	308.502	220.502	274.502	328.502	384.502			533.95	330.24	360.24	398.24	446.24	330.24	360.24	398.24	446.24	330.24	360.24	398.24
191.42	220.24	257.24	304.24	363.24	220.24	257.24	304.24	363.24	220.24	257.24	304.24	363.24	256.24	325.24	396.24	467.24			193.584	223.502	260.502	307.502	366.502	223.502	260.502	307.502	366.502	223.502	260.502	307.502	366.502	259.502	328.502	399.502	470.502			559.95	361.24	398.24	445.24	504.24	361.24	398.24	445.24	504.24	361.24	398.24	445.24
223.42	259.24	305.24	363.24	435.24	259.24	305.24	363.24	435.24	259.24	305.24	363.24	435.24	299.24	381.24	467.24	555.24			225.584	262.502	308.502	366.502	438.502	262.502	308.502	366.502	438.502	262.502	308.502	366.502	438.502	302.502	384.502	470.502	558.503			591.95	400.24	446.24	504.24	576.24	400.24	446.24	504.24	576.24	400.24	446.24	504.24
step 5	get the eigenvalues (ei) of M																		get the eigenvalues (ei) of M																			get the eigenvalues (ei) of M
0.167149																			0.182653																			0.320625
0.320625																			0.320625																			0.320625
0.320625																			0.320625																			0.320625
0.320625																			0.320625																			0.354648
0.394854																			0.384258																			0.725979
0.725979																			0.725979																			0.725979
0.725979																			0.725979																			0.725979
0.725979																			0.725979																			1.08055
1.18829																			1.21671																			4
4																			4																			4
4																			4																			4
4																			4																			22.8942
52.8791																			54.4616																			274.953
274.953																			274.953																			274.953
274.953																			274.953																			274.953
274.953																			274.953																			422.75
4840.82																			4892.59																			7659.9
step 6	get the biggest eigenvalues (eca-max,r)																		get the biggest eigenvalues (eca-max,e)																			get the biggest eigenvalues (eca-max,w)
4840.82																			4892.59																			7659.9
step 7	label the atoms of anion
step 8	get the distance matrix D of the anion
0	1	1	1	1	2	3
1	0	2	2	2	3	4
1	2	0	2	2	3	4
1	2	2	0	2	3	4
1	2	2	2	0	1	2
2	3	3	3	1	0	1
3	4	4	4	2	1	0
Step 9	list van der Waal radius of each atom in a row just next to the distance matrix to form a combined matrix D’																		list atom electronegativity of each atom in a row just next to the distance matrix to form a combined matrix D’																			list atom weight of each atom in a row just next to the distance matrix to form a combined matrix D’
0	1	1	1	1	2	3	1.85												0	1	1	1	1	2	3	2.58												0	1	1	1	1	2	3	32.07
1	0	2	2	2	3	4	1.4												1	0	2	2	2	3	4	3.44												1	0	2	2	2	3	4	16
1	2	0	2	2	3	4	1.4												1	2	0	2	2	3	4	3.44												1	2	0	2	2	3	4	16
1	2	2	0	2	3	4	1.4												1	2	2	0	2	3	4	3.44												1	2	2	0	2	3	4	16
1	2	2	2	0	1	2	1.8												1	2	2	2	0	1	2	2.55												1	2	2	2	0	1	2	12.01
2	3	3	3	1	0	1	1.8												2	3	3	3	1	0	1	2.55												2	3	3	3	1	0	1	12.01
3	4	4	4	2	1	0	1.5												3	4	4	4	2	1	0	3.04												3	4	4	4	2	1	0	14.01
step 10	obtain matrix M																		obtain matrix M																			obtain matrix M
20.4225	26.59	26.59	26.59	17.33	16.33	18.775													23.6564	32.8752	32.8752	32.8752	20.579	19.579	23.8432													1045.48	537.12	537.12	537.12	399.161	398.161	465.301
26.59	39.96	35.96	35.96	22.52	22.52	28.1													32.8752	49.8336	45.8336	45.8336	28.772	28.772	36.4576													537.12	294	290	290	212.16	212.16	250.16
26.59	35.96	39.96	35.96	22.52	22.52	28.1													32.8752	45.8336	49.8336	45.8336	28.772	28.772	36.4576													537.12	290	294	290	212.16	212.16	250.16
26.59	35.96	35.96	39.96	22.52	22.52	28.1													32.8752	45.8336	45.8336	49.8336	28.772	28.772	36.4576													537.12	290	290	294	212.16	212.16	250.16
17.33	22.52	22.52	22.52	21.24	25.24	30.7													20.579	28.772	28.772	28.772	24.5025	28.5025	35.752													399.161	212.16	212.16	212.16	162.24	166.24	196.26
16.33	22.52	22.52	22.52	25.24	36.24	46.7													19.579	28.772	28.772	28.772	28.5025	39.5025	51.752													398.161	212.16	212.16	212.16	166.24	177.24	212.26
18.775	28.1	28.1	28.1	30.7	46.7	64.25													23.8432	36.4576	36.4576	36.4576	35.752	51.752	71.2416													465.301	250.16	250.16	250.16	196.26	212.26	258.28
step 11	get the eigenvalues (ei) of M																		get the eigenvalues (ei) of M																			get the eigenvalues (ei) of M
0.360779																			0.22383																			0.39622
0.448807																			0.423444																			2.43608
3.99704																			2.99714																			4
4																			4																			4
4																			4																			24.1298
46.5771																			47.2413																			58.1761
202.649																			249.518																			2432.11
step 12	get the biggest eigenvalues (ean-max,r)																		get the biggest eigenvalues (ean-max,e)																			get the biggest eigenvalues (ean-max,w)
202.649																			249.518																			2432.11
step 13	get the interaction between cation and anion eca-an,r																		get the interaction between cation and anion eca-an,e																			get the interaction between cation and anion eca-an,w
77.4434																			78.0848																			107.108
finally we get 18 topological indexes for [P4,4,4,4][Tau]
eca-max,r	ean-max,r	eca-an,r	eca-max,e	ean-max,e	eca-an,e	eca-max,w	ean-max,w	eca-an,w	eca-max,h	ean-max,h	eca-an,h	eca-max,s	ean-max,s	eca-an,s	eca-max,o	ean-max,o	eca-an,o
4840.82	202.649	77.4434	4892.59	249.518	78.0848	7659.9	2432.11	107.108	4868.89	191.306	77.5887	4855.49	216.344	77.6531	5053.85	382.727	80.0375
[truncated: 60 more columns]

## Sheet: Table S4
Topological indexes for 45 ionic liquids
	eca-max,r	ean-max,r	eca-an,r	eca-max,e	ean-max,e	eca-an,e	eca-max,w	ean-max,w	eca-an,w	eca-max,h	ean-max,h	eca-an,h	eca-max,s	ean-max,s	eca-an,s	eca-max,o	ean-max,o	eca-an,o
[C2mim][NTf2]	289.862	2198.94	55.6443	321.575	2344.38	57.2139	1514.46	7682.48	100.139	285.602	2167.13	55.3444	297.563	2231.79	56.0357	407.03	2727.4	61.2454
[C4mim][NTf2]	783.9	2198.94	61.3903	821.761	2344.38	62.8684	2278.84	7682.48	104.796	785.231	2167.13	61.1882	793.069	2231.79	61.7576	924.65	2727.4	66.7008
[C6mim][NTf2]	1778.31	2198.94	71.7583	1822.66	2344.38	73.0715	3542.57	7682.48	112.449	1775.46	2167.13	71.5472	1789.03	2231.79	72.0833	1943.77	2727.4	76.518
[C8mim][NTf2]	3524.44	2198.94	87.1191	3575.35	2344.38	88.2409	5558.63	7682.48	123.964	3522.14	2167.13	86.954	3536.71	2231.79	87.3957	3715.02	2727.4	91.2195
[C10mim][NTf2]	6321.41	2198.94	107.267	6378.89	2344.38	108.21	8626.59	7682.48	139.877	6319.75	2167.13	107.14	6335.23	2231.79	107.499	6537.21	2727.4	110.738
[C4mim][OTf]	783.9	239.692	36.5572	821.761	318.974	38.1403	2278.84	3218	76.5389	785.231	223.122	36.4417	793.069	257.468	36.9459	924.65	528.183	42.107
[C2mim][EtSO4]	289.862	202.828	25.2127	321.575	250.52	26.8047	1514.46	2489.89	64.7531	285.602	190.879	25.1396	297.563	216.344	25.671	407.03	390.159	30.8545
[C2mim][OcSO4]	289.862	2902.8	66.2957	321.575	2969.82	67.0635	1514.46	5869.92	93.7998	285.602	2889.07	66.3023	297.563	2921.75	66.5056	407.03	3160.72	69.1954
[C4mpyrr][FAP]	694.194	7710.19	98.2816	728.579	7982.73	99.8434	2139.18	15722	139.244	706.327	7658.76	98.0714	702.351	7758.54	98.5748	825.935	8641.58	103.653
[C4mpyrr][NTf2]	694.194	2198.94	60.2143	728.579	2344.38	61.6904	2139.18	7682.48	103.856	706.327	2167.13	60.05	702.351	2231.79	60.5805	825.935	2727.4	65.5439
[P4,4,4,16][FAP]	73680.2	7710.19	317.69	73781.9	7982.73	318.286	78490.2	15722	338.617	73719.4	7658.76	317.666	73706.7	7758.54	317.814	74088.8	8641.58	319.85
[P6,6,6,14][NTf2]	73680.2	2198.94	308.048	73781.9	2344.38	308.452	78490.2	7682.48	325.666	73719.4	2167.13	308.058	73706.7	2231.79	308.154	74088.8	2727.4	309.606
[P4,4,4,16][Phosph]	73680.2	7322.91	318.84	73781.9	7392.66	319.12	78490.2	10643.6	332.935	73719.4	7333.31	318.951	73706.7	7342.23	318.92	74088.8	7597.83	319.972
[P6,6,6,14][Cl]	73680.2	3.4225	303.603	73781.9	9.9856	303.788	78490.2	1256.7	314.477	73719.4	1	303.666	73706.7	9	303.661	74088.8	49	304.385
[P4,4,4,1][MeSO4]	2691.94	107.281	58.7046	2734.34	152.556	59.4628	5179.34	2269.5	91.7441	2716.36	95.9101	58.8812	2704.57	120.152	58.9576	2868.98	285.017	61.7657
[C4mim][BF4]	783.9	51.8634	33.3267	821.761	111.107	34.7854	2278.84	1604.48	64.6478	785.231	43.6333	33.3467	793.069	63.241	33.6452	924.65	248.388	38.1445
[C6mim][BF4]	1778.31	51.8634	49.9114	1822.66	111.107	50.9611	3542.57	1604.48	76.4318	1775.46	43.6333	49.8698	1789.03	63.241	50.1398	1943.77	248.388	53.4883
[C8mim][BF4]	3524.44	51.8634	70.2256	3575.35	111.107	71.0214	5558.63	1604.48	92.5435	3522.14	43.6333	70.2068	3536.71	63.241	70.3989	3715.02	248.388	72.9863
[C4mim][PF6]	783.9	125.135	34.5393	821.761	211.514	36.309	2278.84	3223.46	76.2864	785.231	111.678	34.4674	793.069	142.086	34.9428	924.65	430.419	40.5586
[C6mim][PF6]	1778.31	125.135	50.7291	1822.66	211.514	52.0129	3542.57	3223.46	86.4991	1775.46	111.678	50.6261	1789.03	142.086	51.0196	1943.77	430.419	55.2359
[C8mim][PF6]	3524.44	125.135	70.8091	3575.35	211.514	71.7799	5558.63	3223.46	101.018	3522.14	111.678	70.746	3536.71	142.086	71.0282	3715.02	430.419	74.2765
[C2mim][CH3COO]	289.862	31.523	20.3553	321.575	57.9959	21.7755	1514.46	821.689	49.381	285.602	25.3247	20.347	297.563	37.3303	20.6882	407.03	125.15	25.0998
[C2mim][DCA]	289.862	81.3496	22.0719	321.575	108.877	23.4143	1514.46	944.679	50.8461	285.602	68.6945	21.7945	297.563	88.2503	22.4054	407.03	1.74788	22.3175
[C2mim][C(CN)3]	289.862	222.768	25.6447	321.575	257.604	26.9302	1514.46	1367.68	55.1163	285.602	204.403	25.2784	297.563	231.512	25.9615	407.03	342.682	29.9833
[C2mim][MeOHPO2]	289.862	55.565	21.0397	321.575	101.426	23.0282	1514.46	1915.04	59.627	285.602	47.9123	21	297.563	66.7219	21.5174	407.03	191.421	26.4764
[C4bim][NTf2]	2309.16	2198.94	76.0295	2355.52	2344.38	77.2913	4193.89	7682.48	115.831	2309.64	2167.13	75.8353	2320.29	2231.79	76.3413	2483.64	2727.4	80.6164
[N8,8,8,1][NTf2]	32521.1	2198.94	207.093	32604.4	2344.38	207.653	36072.2	7682.48	228.701	32554.9	2167.13	207.099	32540.6	2231.79	207.229	32844	2727.4	209.194
[N4,4,4,1][Ser]	2691	202.374	59.7346	2737.2	249.897	60.5312	4659.61	1581.96	83.5129	2716.36	190.937	59.8999	2701.91	213.116	59.9166	2868.98	366.464	62.6099
[N4,4,4,1][Tau]	2691	202.649	59.7696	2737.2	249.518	60.5655	4659.61	2432.11	88.6716	2716.36	191.306	59.95	2701.91	216.344	59.9917	2868.98	382.727	62.8013
[N4,4,4,1][Lys]	2691	908.61	67.2624	2737.2	962.631	68.0216	4659.61	2643.91	91.0681	2716.36	898.772	67.4463	2701.91	921.417	67.4389	2868.98	1097.47	70.0214
[N4,4,4,1][Thr]	2691	302.156	60.7409	2737.2	352.483	61.551	4659.61	1820.55	85.0685	2716.36	291.004	60.9262	2701.91	313.63	60.9262	2868.98	477.559	63.671
[P4,4,4,4][Ser]	4840.82	202.374	77.4164	4892.59	249.897	78.0582	7659.9	1581.96	102.878	4868.89	190.937	77.55	4855.49	213.116	77.5951	5053.85	366.464	79.8874
[P4,4,4,4][Tau]	4840.82	202.649	77.4434	4892.59	249.518	78.0848	7659.9	2432.11	107.108	4868.89	191.306	77.5887	4855.49	216.344	77.6531	5053.85	382.727	80.0375
[P4,4,4,4][Lys]	4840.82	908.61	83.3625	4892.59	962.631	84	7659.9	2643.91	109.101	4868.89	898.772	83.5165	4855.49	921.417	83.5404	5053.85	1097.47	85.8196
[P4,4,4,4][Thr]	4840.82	302.156	78.1955	4892.59	352.483	78.8517	7659.9	1820.55	104.145	4868.89	291.004	78.3454	4855.49	313.63	78.3773	5053.85	477.559	80.7217
[P4,4,4,4][Pro]	4840.82	274.927	78.0373	4892.59	318.299	78.6528	7659.9	1680.22	103.482	4868.89	261.498	78.1665	4855.49	284.99	78.2113	5053.85	428.649	80.4363
[P4,4,4,4][Val]	4840.82	303.597	78.2037	4892.59	346.745	78.8179	7659.9	1707.11	103.607	4868.89	296.591	78.3964	4855.49	313.63	78.3773	5053.85	456.551	80.5978
[P4,4,4,4][Cys]	4840.82	204.091	77.4259	4892.59	243.957	78.0251	7659.9	2342.92	106.567	4868.89	190.937	77.55	4855.49	218.17	77.6273	5053.85	366.464	79.8874
[C4mim][NPf2]	783.9	6658.66	96.4497	821.761	6866.13	97.718	2278.84	13684.8	135.036	785.231	6613.98	96.2497	793.069	6701.95	96.7368	924.65	7395.25	100.98
[N4,1,1,1][ NTf2]	363.411	2198.94	56.5799	391.681	2344.38	58.0921	1533.99	7682.48	100.398	383.441	2167.13	56.4801	370.145	2231.79	56.9561	471.126	2727.4	62.0161
[N4COOH,1,1,1][ NTf2]	849.224	2198.94	62.1707	898.686	2344.38	63.7053	2528.65	7682.48	106.074	847.555	2167.13	61.9839	860.773	2231.79	62.546	1026.37	2727.4	67.6609
[C4mmim][ NTf2]	997.581	2198.94	63.372	1038.34	2344.38	64.8301	2627.66	7682.48	106.632	996.316	2167.13	63.1585	1007.42	2231.79	63.7338	1149.91	2727.4	68.6222
[C4py][BF4]	790.337	51.8634	33.4912	824.854	111.107	34.8896	2234.82	1604.48	64.3218	781.201	43.6333	33.2866	798.535	63.241	33.7935	922.336	248.388	38.1576
[C6py][BF4]	1787.47	51.8634	50.0214	1828.3	111.107	51.0323	3500.86	1604.48	76.1563	1778.86	43.6333	49.8999	1797.15	63.241	50.2394	1943.85	248.388	53.4977
[C8py][BF4]	3536.84	51.8634	70.3038	3584.1	111.107	71.0725	5519.42	1604.48	92.3161	3528.76	43.6333	70.2282	3548.03	63.241	70.4699	3718.04	248.388	72.9932

## Sheet: Table S5
			c0	c1	c2	c3	c4	c5	c6	c7	c8	c9	c10	c11	c12	c13	c14	c15	c16	c17	c18	d0	d1
			0.325884	-0.011321	0.00230768	-0.278169	-0.0217071	0.00134735	-0.0483165	-0.000213036	4.93029e-05	-0.00854528	-0.000180308	-0.000774005	0.0330908	0.0270421	-0.00222058	0.272529	0.00637864	-0.000707589	0.0288991	9.89528e-05	-1.76742e-09
Ionic liquids	Reference	Thermal conductivity λexp	T/ K	eca-max,r	ean-max,r	eca-an,r	eca-max,e	ean-max,e	eca-an,e	eca-max,w	ean-max,w	eca-an,w	eca-max,h	ean-max,h	eca-an,h	eca-max,s	ean-max,s	eca-an,s	eca-max,o	ean-max,o	eca-an,o	average	Thermal conductivity λcalc	AD%	Data points	AAD%	AAD%
[C2mim][NTf2]	Ge, R.; Hardacre, C.; Nancarrow, P.; Rooney, D. W. Thermal Conductivities of Ionic Liquids over the Temperature Range from 293 K to 353 K. J. Chem. Eng. Data 2007, 52, 1819.	0.13	293	289.862	2198.94	55.6443	321.575	2344.38	57.2139	1514.46	7682.48	100.139	285.602	2167.13	55.3444	297.563	2231.79	56.0357	407.03	2727.4	61.2454	1269.66	0.127361	2.02965	7	3.63022	4.20419
		0.13	303	289.862	2198.94	55.6443	321.575	2344.38	57.2139	1514.46	7682.48	100.139	285.602	2167.13	55.3444	297.563	2231.79	56.0357	407.03	2727.4	61.2454	1269.66	0.126394	2.77356
		0.129	313	289.862	2198.94	55.6443	321.575	2344.38	57.2139	1514.46	7682.48	100.139	285.602	2167.13	55.3444	297.563	2231.79	56.0357	407.03	2727.4	61.2454	1269.66	0.125427	2.76955
		0.129	323	289.862	2198.94	55.6443	321.575	2344.38	57.2139	1514.46	7682.48	100.139	285.602	2167.13	55.3444	297.563	2231.79	56.0357	407.03	2727.4	61.2454	1269.66	0.12446	3.51923
		0.129	333	289.862	2198.94	55.6443	321.575	2344.38	57.2139	1514.46	7682.48	100.139	285.602	2167.13	55.3444	297.563	2231.79	56.0357	407.03	2727.4	61.2454	1269.66	0.123493	4.26891
		0.129	343	289.862	2198.94	55.6443	321.575	2344.38	57.2139	1514.46	7682.48	100.139	285.602	2167.13	55.3444	297.563	2231.79	56.0357	407.03	2727.4	61.2454	1269.66	0.122526	5.01859
		0.128	353	289.862	2198.94	55.6443	321.575	2344.38	57.2139	1514.46	7682.48	100.139	285.602	2167.13	55.3444	297.563	2231.79	56.0357	407.03	2727.4	61.2454	1269.66	0.121559	5.03208
	Froba, A. P.; Rausch, M. H.; Krzeminski, K.; Assenbaum, D.; Wasserscheid, P.; Leipertz, A. Thermal Conductivity of Ionic Liquids: Measurement and Prediction. Int. J. Thermophys. 2010, 31, 2059.	0.1208	273.15	289.862	2198.94	55.6443	321.575	2344.38	57.2139	1514.46	7682.48	100.139	285.602	2167.13	55.3444	297.563	2231.79	56.0357	407.03	2727.4	61.2454	1269.66	0.129281	7.0208	9	4.6506
		0.1206	283.15	289.862	2198.94	55.6443	321.575	2344.38	57.2139	1514.46	7682.48	100.139	285.602	2167.13	55.3444	297.563	2231.79	56.0357	407.03	2727.4	61.2454	1269.66	0.128314	6.39639
		0.1202	293.15	289.862	2198.94	55.6443	321.575	2344.38	57.2139	1514.46	7682.48	100.139	285.602	2167.13	55.3444	297.563	2231.79	56.0357	407.03	2727.4	61.2454	1269.66	0.127347	5.94589
		0.1215	303.15	289.862	2198.94	55.6443	321.575	2344.38	57.2139	1514.46	7682.48	100.139	285.602	2167.13	55.3444	297.563	2231.79	56.0357	407.03	2727.4	61.2454	1269.66	0.12638	4.01635
		0.1195	313.15	289.862	2198.94	55.6443	321.575	2344.38	57.2139	1514.46	7682.48	100.139	285.602	2167.13	55.3444	297.563	2231.79	56.0357	407.03	2727.4	61.2454	1269.66	0.125413	4.94793
		0.1184	323.15	289.862	2198.94	55.6443	321.575	2344.38	57.2139	1514.46	7682.48	100.139	285.602	2167.13	55.3444	297.563	2231.79	56.0357	407.03	2727.4	61.2454	1269.66	0.124446	5.10616
		0.119	333.15	289.862	2198.94	55.6443	321.575	2344.38	57.2139	1514.46	7682.48	100.139	285.602	2167.13	55.3444	297.563	2231.79	56.0357	407.03	2727.4	61.2454	1269.66	0.123479	3.76353
		0.1194	343.15	289.862	2198.94	55.6443	321.575	2344.38	57.2139	1514.46	7682.48	100.139	285.602	2167.13	55.3444	297.563	2231.79	56.0357	407.03	2727.4	61.2454	1269.66	0.122512	2.60596
		0.1191	353.15	289.862	2198.94	55.6443	321.575	2344.38	57.2139	1514.46	7682.48	100.139	285.602	2167.13	55.3444	297.563	2231.79	56.0357	407.03	2727.4	61.2454	1269.66	0.121544	2.05241
[C4mim][NTf2]	Ge, R.; Hardacre, C.; Nancarrow, P.; Rooney, D. W. Thermal Conductivities of Ionic Liquids over the Temperature Range from 293 K to 353 K. J. Chem. Eng. Data 2007, 52, 1819.	0.128	293	783.9	2198.94	61.3903	821.761	2344.38	62.8684	2278.84	7682.48	104.796	785.231	2167.13	61.1882	793.069	2231.79	61.7576	924.65	2727.4	66.7008	1453.24	0.12426	2.92216	7	3.57123	3.17363
		0.127	303	783.9	2198.94	61.3903	821.761	2344.38	62.8684	2278.84	7682.48	104.796	785.231	2167.13	61.1882	793.069	2231.79	61.7576	924.65	2727.4	66.7008	1453.24	0.123296	2.9167
		0.127	313	783.9	2198.94	61.3903	821.761	2344.38	62.8684	2278.84	7682.48	104.796	785.231	2167.13	61.1882	793.069	2231.79	61.7576	924.65	2727.4	66.7008	1453.24	0.122332	3.67563
		0.126	323	783.9	2198.94	61.3903	821.761	2344.38	62.8684	2278.84	7682.48	104.796	785.231	2167.13	61.1882	793.069	2231.79	61.7576	924.65	2727.4	66.7008	1453.24	0.121368	3.6761
		0.125	333	783.9	2198.94	61.3903	821.761	2344.38	62.8684	2278.84	7682.48	104.796	785.231	2167.13	61.1882	793.069	2231.79	61.7576	924.65	2727.4	66.7008	1453.24	0.120404	3.67659
		0.124	343	783.9	2198.94	61.3903	821.761	2344.38	62.8684	2278.84	7682.48	104.796	785.231	2167.13	61.1882	793.069	2231.79	61.7576	924.65	2727.4	66.7008	1453.24	0.11944	3.67708
		0.124	353	783.9	2198.94	61.3903	821.761	2344.38	62.8684	2278.84	7682.48	104.796	785.231	2167.13	61.1882	793.069	2231.79	61.7576	924.65	2727.4	66.7008	1453.24	0.118477	4.45437
	Liu, H.; Maginn, E.; Visser, A. E.; Bridges, N. J.; Fox, E. B. Thermal and Transport Properties of Six Ionic Liquids: An Experimental and Molecular Dynamics Study. Ind. Eng. Chem. Res. 2012, 51, 7242.	0.126354	296.237	783.9	2198.94	61.3903	821.761	2344.38	62.8684	2278.84	7682.48	104.796	785.231	2167.13	61.1882	793.069	2231.79	61.7576	924.65	2727.4	66.7008	1453.24	0.123948	1.9041	3	2.24588
		0.125618	312.773	783.9	2198.94	61.3903	821.761	2344.38	62.8684	2278.84	7682.48	104.796	785.231	2167.13	61.1882	793.069	2231.79	61.7576	924.65	2727.4	66.7008	1453.24	0.122354	2.59838
		0.12322	332.359	783.9	2198.94	61.3903	821.761	2344.38	62.8684	2278.84	7682.48	104.796	785.231	2167.13	61.1882	793.069	2231.79	61.7576	924.65	2727.4	66.7008	1453.24	0.120466	2.23515
[C6mim][NTf2]	Ge, R.; Hardacre, C.; Nancarrow, P.; Rooney, D. W. Thermal Conductivities of Ionic Liquids over the Temperature Range from 293 K to 353 K. J. Chem. Eng. Data 2007, 52, 1819.	0.127	293	1778.31	2198.94	71.7583	1822.66	2344.38	73.0715	3542.57	7682.48	112.449	1775.46	2167.13	71.5472	1789.03	2231.79	72.0833	1943.77	2727.4	76.518	1804.52	0.123853	2.4777	7	3.98895	2.45284
		0.127	303	1778.31	2198.94	71.7583	1822.66	2344.38	73.0715	3542.57	7682.48	112.449	1775.46	2167.13	71.5472	1789.03	2231.79	72.0833	1943.77	2727.4	76.518	1804.52	0.122896	3.23174
		0.127	313	1778.31	2198.94	71.7583	1822.66	2344.38	73.0715	3542.57	7682.48	112.449	1775.46	2167.13	71.5472	1789.03	2231.79	72.0833	1943.77	2727.4	76.518	1804.52	0.121938	3.98579
		0.126	323	1778.31	2198.94	71.7583	1822.66	2344.38	73.0715	3542.57	7682.48	112.449	1775.46	2167.13	71.5472	1789.03	2231.79	72.0833	1943.77	2727.4	76.518	1804.52	0.12098	3.9838
		0.125	333	1778.31	2198.94	71.7583	1822.66	2344.38	73.0715	3542.57	7682.48	112.449	1775.46	2167.13	71.5472	1789.03	2231.79	72.0833	1943.77	2727.4	76.518	1804.52	0.120023	3.98177
		0.125	343	1778.31	2198.94	71.7583	1822.66	2344.38	73.0715	3542.57	7682.48	112.449	1775.46	2167.13	71.5472	1789.03	2231.79	72.0833	1943.77	2727.4	76.518	1804.52	0.119065	4.74788
		0.125	353	1778.31	2198.94	71.7583	1822.66	2344.38	73.0715	3542.57	7682.48	112.449	1775.46	2167.13	71.5472	1789.03	2231.79	72.0833	1943.77	2727.4	76.518	1804.52	0.118108	5.51399
	Froba, A. P.; Rausch, M. H.; Krzeminski, K.; Assenbaum, D.; Wasserscheid, P.; Leipertz, A. Thermal Conductivity of Ionic Liquids: Measurement and Prediction. Int. J. Thermophys. 2010, 31, 2059.	0.1238	273.15	1778.31	2198.94	71.7583	1822.66	2344.38	73.0715	3542.57	7682.48	112.449	1775.46	2167.13	71.5472	1789.03	2231.79	72.0833	1943.77	2727.4	76.518	1804.52	0.125754	1.57854	9	1.25809
		0.1224	283.15	1778.31	2198.94	71.7583	1822.66	2344.38	73.0715	3542.57	7682.48	112.449	1775.46	2167.13	71.5472	1789.03	2231.79	72.0833	1943.77	2727.4	76.518	1804.52	0.124797	1.958
		0.1219	293.15	1778.31	2198.94	71.7583	1822.66	2344.38	73.0715	3542.57	7682.48	112.449	1775.46	2167.13	71.5472	1789.03	2231.79	72.0833	1943.77	2727.4	76.518	1804.52	0.123839	1.59061
		0.1237	303.15	1778.31	2198.94	71.7583	1822.66	2344.38	73.0715	3542.57	7682.48	112.449	1775.46	2167.13	71.5472	1789.03	2231.79	72.0833	1943.77	2727.4	76.518	1804.52	0.122881	0.661825
		0.122	313.15	1778.31	2198.94	71.7583	1822.66	2344.38	73.0715	3542.57	7682.48	112.449	1775.46	2167.13	71.5472	1789.03	2231.79	72.0833	1943.77	2727.4	76.518	1804.52	0.121924	0.0625507
		0.1201	323.15	1778.31	2198.94	71.7583	1822.66	2344.38	73.0715	3542.57	7682.48	112.449	1775.46	2167.13	71.5472	1789.03	2231.79	72.0833	1943.77	2727.4	76.518	1804.52	0.120966	0.72111
		0.1208	333.15	1778.31	2198.94	71.7583	1822.66	2344.38	73.0715	3542.57	7682.48	112.449	1775.46	2167.13	71.5472	1789.03	2231.79	72.0833	1943.77	2727.4	76.518	1804.52	0.120008	0.655283
		0.1212	343.15	1778.31	2198.94	71.7583	1822.66	2344.38	73.0715	3542.57	7682.48	112.449	1775.46	2167.13	71.5472	1789.03	2231.79	72.0833	1943.77	2727.4	76.518	1804.52	0.119051	1.77328
		0.1209	353.15	1778.31	2198.94	71.7583	1822.66	2344.38	73.0715	3542.57	7682.48	112.449	1775.46	2167.13	71.5472	1789.03	2231.79	72.0833	1943.77	2727.4	76.518	1804.52	0.118093	2.32163
[C8mim][NTf2]	Ge, R.; Hardacre, C.; Nancarrow, P.; Rooney, D. W. Thermal Conductivities of Ionic Liquids over the Temperature Range from 293 K to 353 K. J. Chem. Eng. Data 2007, 52, 1819.	0.128	293	3524.44	2198.94	87.1191	3575.35	2344.38	88.2409	5558.63	7682.48	123.964	3522.14	2167.13	86.954	3536.71	2231.79	87.3957	3715.02	2727.4	91.2195	2408.29	0.128757	0.591677	7	0.802128	0.802128
		0.128	303	3524.44	2198.94	87.1191	3575.35	2344.38	88.2409	5558.63	7682.48	123.964	3522.14	2167.13	86.954	3536.71	2231.79	87.3957	3715.02	2727.4	91.2195	2408.29	0.12781	0.148138
		0.128	313	3524.44	2198.94	87.1191	3575.35	2344.38	88.2409	5558.63	7682.48	123.964	3522.14	2167.13	86.954	3536.71	2231.79	87.3957	3715.02	2727.4	91.2195	2408.29	0.126863	0.887953
		0.126	323	3524.44	2198.94	87.1191	3575.35	2344.38	88.2409	5558.63	7682.48	123.964	3522.14	2167.13	86.954	3536.71	2231.79	87.3957	3715.02	2727.4	91.2195	2408.29	0.125916	0.0663046
		0.126	333	3524.44	2198.94	87.1191	3575.35	2344.38	88.2409	5558.63	7682.48	123.964	3522.14	2167.13	86.954	3536.71	2231.79	87.3957	3715.02	2727.4	91.2195	2408.29	0.124969	0.817863
		0.125	343	3524.44	2198.94	87.1191	3575.35	2344.38	88.2409	5558.63	7682.48	123.964	3522.14	2167.13	86.954	3536.71	2231.79	87.3957	3715.02	2727.4	91.2195	2408.29	0.124023	0.781977
		0.126	353	3524.44	2198.94	87.1191	3575.35	2344.38	88.2409	5558.63	7682.48	123.964	3522.14	2167.13	86.954	3536.71	2231.79	87.3957	3715.02	2727.4	91.2195	2408.29	0.123076	2.32098
[C10mim][NTf2]	Ge, R.; Hardacre, C.; Nancarrow, P.; Rooney, D. W. Thermal Conductivities of Ionic Liquids over the Temperature Range from 293 K to 353 K. J. Chem. Eng. Data 2007, 52, 1819.	0.132	293	6321.41	2198.94	107.267	6378.89	2344.38	108.21	8626.59	7682.48	139.877	6319.75	2167.13	107.14	6335.23	2231.79	107.499	6537.21	2727.4	110.738	3364	0.135329	2.52194	7	2.40086	2.40086
		0.131	303	6321.41	2198.94	107.267	6378.89	2344.38	108.21	8626.59	7682.48	139.877	6319.75	2167.13	107.14	6335.23	2231.79	107.499	6537.21	2727.4	110.738	3364	0.134399	2.59457
		0.13	313	6321.41	2198.94	107.267	6378.89	2344.38	108.21	8626.59	7682.48	139.877	6319.75	2167.13	107.14	6335.23	2231.79	107.499	6537.21	2727.4	110.738	3364	0.133469	2.66832
		0.129	323	6321.41	2198.94	107.267	6378.89	2344.38	108.21	8626.59	7682.48	139.877	6319.75	2167.13	107.14	6335.23	2231.79	107.499	6537.21	2727.4	110.738	3364	0.132539	2.74322
		0.128	333	6321.41	2198.94	107.267	6378.89	2344.38	108.21	8626.59	7682.48	139.877	6319.75	2167.13	107.14	6335.23	2231.79	107.499	6537.21	2727.4	110.738	3364	0.131609	2.81928
		0.128	343	6321.41	2198.94	107.267	6378.89	2344.38	108.21	8626.59	7682.48	139.877	6319.75	2167.13	107.14	6335.23	2231.79	107.499	6537.21	2727.4	110.738	3364	0.130679	2.09266
		0.128	353	6321.41	2198.94	107.267	6378.89	2344.38	108.21	8626.59	7682.48	139.877	6319.75	2167.13	107.14	6335.23	2231.79	107.499	6537.21	2727.4	110.738	3364	0.129749	1.36604
[C4mim][OTf]	Ge, R.; Hardacre, C.; Nancarrow, P.; Rooney, D. W. Thermal Conductivities of Ionic Liquids over the Temperature Range from 293 K to 353 K. J. Chem. Eng. Data 2007, 52, 1819.	0.147	293	783.9	239.692	36.5572	821.761	318.974	38.1403	2278.84	3218	76.5389	785.231	223.122	36.4417	793.069	257.468	36.9459	924.65	528.183	42.107	635.534	0.150933	2.67554	7	2.46921	4.2519
		0.146	303	783.9	239.692	36.5572	821.761	318.974	38.1403	2278.84	3218	76.5389	785.231	223.122	36.4417	793.069	257.468	36.9459	924.65	528.183	42.107	635.534	0.149955	2.70873
		0.145	313	783.9	239.692	36.5572	821.761	318.974	38.1403	2278.84	3218	76.5389	785.231	223.122	36.4417	793.069	257.468	36.9459	924.65	528.183	42.107	635.534	0.148976	2.74238
		0.144	323	783.9	239.692	36.5572	821.761	318.974	38.1403	2278.84	3218	76.5389	785.231	223.122	36.4417	793.069	257.468	36.9459	924.65	528.183	42.107	635.534	0.147998	2.77649
		0.144	333	783.9	239.692	36.5572	821.761	318.974	38.1403	2278.84	3218	76.5389	785.231	223.122	36.4417	793.069	257.468	36.9459	924.65	528.183	42.107	635.534	0.14702	2.09712
		0.143	343	783.9	239.692	36.5572	821.761	318.974	38.1403	2278.84	3218	76.5389	785.231	223.122	36.4417	793.069	257.468	36.9459	924.65	528.183	42.107	635.534	0.146042	2.12697
		0.142	353	783.9	239.692	36.5572	821.761	318.974	38.1403	2278.84	3218	76.5389	785.231	223.122	36.4417	793.069	257.468	36.9459	924.65	528.183	42.107	635.534	0.145063	2.15723
	Nieto De Castro, C. A.; Lourenco, M. J. V.; Ribeiro, A. P. C.; Langa, E.; Vieira, S. I. C.; Goodrich, P.; Hardacre, C. Thermal Properties of Ionic Liquids and Ionanofluids of Imidazolium and Pyrrolidinium Liquids. J. Chem. Eng. Data 2010, 55, 653.	0.142	293	783.9	239.692	36.5572	821.761	318.974	38.1403	2278.84	3218	76.5389	785.231	223.122	36.4417	793.069	257.468	36.9459	924.65	528.183	42.107	635.534	0.150933	6.29087	7	6.0346
		0.141	303	783.9	239.692	36.5572	821.761	318.974	38.1403	2278.84	3218	76.5389	785.231	223.122	36.4417	793.069	257.468	36.9459	924.65	528.183	42.107	635.534	0.149955	6.35088
		0.14	313	783.9	239.692	36.5572	821.761	318.974	38.1403	2278.84	3218	76.5389	785.231	223.122	36.4417	793.069	257.468	36.9459	924.65	528.183	42.107	635.534	0.148976	6.41175
		0.139	323	783.9	239.692	36.5572	821.761	318.974	38.1403	2278.84	3218	76.5389	785.231	223.122	36.4417	793.069	257.468	36.9459	924.65	528.183	42.107	635.534	0.147998	6.47349
		0.139	333	783.9	239.692	36.5572	821.761	318.974	38.1403	2278.84	3218	76.5389	785.231	223.122	36.4417	793.069	257.468	36.9459	924.65	528.183	42.107	635.534	0.14702	5.76968
		0.138	343	783.9	239.692	36.5572	821.761	318.974	38.1403	2278.84	3218	76.5389	785.231	223.122	36.4417	793.069	257.468	36.9459	924.65	528.183	42.107	635.534	0.146042	5.82722
		0.138	353	783.9	239.692	36.5572	821.761	318.974	38.1403	2278.84	3218	76.5389	785.231	223.122	36.4417	793.069	257.468	36.9459	924.65	528.183	42.107	635.534	0.145063	5.11831
[C2mim][EtSO4]	Ge, R.; Hardacre, C.; Nancarrow, P.; Rooney, D. W. Thermal Conductivities of Ionic Liquids over the Temperature Range from 293 K to 353 K. J. Chem. Eng. Data 2007, 52, 1819.	0.182	293	289.862	202.828	25.2127	321.575	250.52	26.8047	1514.46	2489.89	64.7531	285.602	190.879	25.1396	297.563	216.344	25.671	407.03	390.159	30.8545	391.953	0.185961	2.17632	7	1.91549	1.07457
		0.181	303	289.862	202.828	25.2127	321.575	250.52	26.8047	1514.46	2489.89	64.7531	285.602	190.879	25.1396	297.563	216.344	25.671	407.03	390.159	30.8545	391.953	0.184978	2.19795
		0.181	313	289.862	202.828	25.2127	321.575	250.52	26.8047	1514.46	2489.89	64.7531	285.602	190.879	25.1396	297.563	216.344	25.671	407.03	390.159	30.8545	391.953	0.183996	1.65508
		0.179	323	289.862	202.828	25.2127	321.575	250.52	26.8047	1514.46	2489.89	64.7531	285.602	190.879	25.1396	297.563	216.344	25.671	407.03	390.159	30.8545	391.953	0.183013	2.24195
		0.179	333	289.862	202.828	25.2127	321.575	250.52	26.8047	1514.46	2489.89	64.7531	285.602	190.879	25.1396	297.563	216.344	25.671	407.03	390.159	30.8545	391.953	0.18203	1.69301
		0.178	343	289.862	202.828	25.2127	321.575	250.52	26.8047	1514.46	2489.89	64.7531	285.602	190.879	25.1396	297.563	216.344	25.671	407.03	390.159	30.8545	391.953	0.181048	1.7123
		0.177	353	289.862	202.828	25.2127	321.575	250.52	26.8047	1514.46	2489.89	64.7531	285.602	190.879	25.1396	297.563	216.344	25.671	407.03	390.159	30.8545	391.953	0.180065	1.7318
	Froba, A. P.; Rausch, M. H.; Krzeminski, K.; Assenbaum, D.; Wasserscheid, P.; Leipertz, A. Thermal Conductivity of Ionic Liquids: Measurement and Prediction. Int. J. Thermophys. 2010, 31, 2059.	0.1876	273.15	289.862	202.828	25.2127	321.575	250.52	26.8047	1514.46	2489.89	64.7531	285.602	190.879	25.1396	297.563	216.344	25.671	407.03	390.159	30.8545	391.953	0.187911	0.165971	9	0.660691
		0.1882	283.15	289.862	202.828	25.2127	321.575	250.52	26.8047	1514.46	2489.89	64.7531	285.602	190.879	25.1396	297.563	216.344	25.671	407.03	390.159	30.8545	391.953	0.186929	0.675473
		0.1856	293.15	289.862	202.828	25.2127	321.575	250.52	26.8047	1514.46	2489.89	64.7531	285.602	190.879	25.1396	297.563	216.344	25.671	407.03	390.159	30.8545	391.953	0.185946	0.186508
		0.1872	303.15	289.862	202.828	25.2127	321.575	250.52	26.8047	1514.46	2489.89	64.7531	285.602	190.879	25.1396	297.563	216.344	25.671	407.03	390.159	30.8545	391.953	0.184964	1.19468
		0.184	313.15	289.862	202.828	25.2127	321.575	250.52	26.8047	1514.46	2489.89	64.7531	285.602	190.879	25.1396	297.563	216.344	25.671	407.03	390.159	30.8545	391.953	0.183981	0.0103492
		0.1833	323.15	289.862	202.828	25.2127	321.575	250.52	26.8047	1514.46	2489.89	64.7531	285.602	190.879	25.1396	297.563	216.344	25.671	407.03	390.159	30.8545	391.953	0.182998	0.164563
		0.1832	333.15	289.862	202.828	25.2127	321.575	250.52	26.8047	1514.46	2489.89	64.7531	285.602	190.879	25.1396	297.563	216.344	25.671	407.03	390.159	30.8545	391.953	0.182016	0.646422
		0.1834	343.15	289.862	202.828	25.2127	321.575	250.52	26.8047	1514.46	2489.89	64.7531	285.602	190.879	25.1396	297.563	216.344	25.671	407.03	390.159	30.8545	391.953	0.181033	1.29054
		0.183	353.15	289.862	202.828	25.2127	321.575	250.52	26.8047	1514.46	2489.89	64.7531	285.602	190.879	25.1396	297.563	216.344	25.671	407.03	390.159	30.8545	391.953	0.180051	1.61172
	Chen, Q.; Wu, K.; He, C. Thermal Conductivities of [EMIM][EtSO4], [EMIM][EtSO4] + C2H5OH, [EMIM][EtSO4] + H2O, and [EMIM][EtSO4] + C2H5OH + H2O at T = (283.15 to 343.15) K. J. Chem. Eng. Data 2013, 58, 2058.	0.185	283.11	289.862	202.828	25.2127	321.575	250.52	26.8047	1514.46	2489.89	64.7531	285.602	190.879	25.1396	297.563	216.344	25.671	407.03	390.159	30.8545	391.953	0.186933	1.0447	8	0.804366
		0.186	293.16	289.862	202.828	25.2127	321.575	250.52	26.8047	1514.46	2489.89	64.7531	285.602	190.879	25.1396	297.563	216.344	25.671	407.03	390.159	30.8545	391.953	0.185945	0.0294749
		0.185	303.16	289.862	202.828	25.2127	321.575	250.52	26.8047	1514.46	2489.89	64.7531	285.602	190.879	25.1396	297.563	216.344	25.671	407.03	390.159	30.8545	391.953	0.184963	0.0202293
		0.185	313.04	289.862	202.828	25.2127	321.575	250.52	26.8047	1514.46	2489.89	64.7531	285.602	190.879	25.1396	297.563	216.344	25.671	407.03	390.159	30.8545	391.953	0.183992	0.544991
		0.184	323.02	289.862	202.828	25.2127	321.575	250.52	26.8047	1514.46	2489.89	64.7531	285.602	190.879	25.1396	297.563	216.344	25.671	407.03	390.159	30.8545	391.953	0.183011	0.537429
		0.184	332.91	289.862	202.828	25.2127	321.575	250.52	26.8047	1514.46	2489.89	64.7531	285.602	190.879	25.1396	297.563	216.344	25.671	407.03	390.159	30.8545	391.953	0.182039	1.06558
		0.184	342.89	289.862	202.828	25.2127	321.575	250.52	26.8047	1514.46	2489.89	64.7531	285.602	190.879	25.1396	297.563	216.344	25.671	407.03	390.159	30.8545	391.953	0.181059	1.59853
		0.183	352.82	289.862	202.828	25.2127	321.575	250.52	26.8047	1514.46	2489.89	64.7531	285.602	190.879	25.1396	297.563	216.344	25.671	407.03	390.159	30.8545	391.953	0.180083	1.594
[C2mim][OcSO4]	Froba, A. P.; Rausch, M. H.; Krzeminski, K.; Assenbaum, D.; Wasserscheid, P.; Leipertz, A. Thermal Conductivity of Ionic Liquids: Measurement and Prediction. Int. J. Thermophys. 2010, 31, 2059.	0.1712	273.15	289.862	2902.8	66.2957	321.575	2969.82	67.0635	1514.46	5869.92	93.7998	285.602	2889.07	66.3023	297.563	2921.75	66.5056	407.03	3160.72	69.1954	1347.74	0.170519	0.397698	9	0.821593	0.821593
		0.1711	283.15	289.862	2902.8	66.2957	321.575	2969.82	67.0635	1514.46	5869.92	93.7998	285.602	2889.07	66.3023	297.563	2921.75	66.5056	407.03	3160.72	69.1954	1347.74	0.169553	0.903897
		0.167	293.15	289.862	2902.8	66.2957	321.575	2969.82	67.0635	1514.46	5869.92	93.7998	285.602	2889.07	66.3023	297.563	2921.75	66.5056	407.03	3160.72	69.1954	1347.74	0.168588	0.950733
		0.1679	303.15	289.862	2902.8	66.2957	321.575	2969.82	67.0635	1514.46	5869.92	93.7998	285.602	2889.07	66.3023	297.563	2921.75	66.5056	407.03	3160.72	69.1954	1347.74	0.167622	0.165565
		0.1648	313.15	289.862	2902.8	66.2957	321.575	2969.82	67.0635	1514.46	5869.92	93.7998	285.602	2889.07	66.3023	297.563	2921.75	66.5056	407.03	3160.72	69.1954	1347.74	0.166656	1.1264
		0.1629	323.15	289.862	2902.8	66.2957	321.575	2969.82	67.0635	1514.46	5869.92	93.7998	285.602	2889.07	66.3023	297.563	2921.75	66.5056	407.03	3160.72	69.1954	1347.74	0.165691	1.71308
		0.1631	333.15	289.862	2902.8	66.2957	321.575	2969.82	67.0635	1514.46	5869.92	93.7998	285.602	2889.07	66.3023	297.563	2921.75	66.5056	407.03	3160.72	69.1954	1347.74	0.164725	0.996255
		0.1626	343.15	289.862	2902.8	66.2957	321.575	2969.82	67.0635	1514.46	5869.92	93.7998	285.602	2889.07	66.3023	297.563	2921.75	66.5056	407.03	3160.72	69.1954	1347.74	0.163759	0.712905
		0.1621	353.15	289.862	2902.8	66.2957	321.575	2969.82	67.0635	1514.46	5869.92	93.7998	285.602	2889.07	66.3023	297.563	2921.75	66.5056	407.03	3160.72	69.1954	1347.74	0.162793	0.427807
[C4mpyrr][FAP]	Ge, R.; Hardacre, C.; Nancarrow, P.; Rooney, D. W. Thermal Conductivities of Ionic Liquids over the Temperature Range from 293 K to 353 K. J. Chem. Eng. Data 2007, 52, 1819.	0.107	293	694.194	7710.19	98.2816	728.579	7982.73	99.8434	2139.18	15722	139.244	706.327	7658.76	98.0714	702.351	7758.54	98.5748	825.935	8641.58	103.653	3439.34	0.107398	0.371654	7	1.14787	1.14787
		0.106	303	694.194	7710.19	98.2816	728.579	7982.73	99.8434	2139.18	15722	139.244	706.327	7658.76	98.0714	702.351	7758.54	98.5748	825.935	8641.58	103.653	3439.34	0.106469	0.442386
		0.106	313	694.194	7710.19	98.2816	728.579	7982.73	99.8434	2139.18	15722	139.244	706.327	7658.76	98.0714	702.351	7758.54	98.5748	825.935	8641.58	103.653	3439.34	0.10554	0.433784
		0.105	323	694.194	7710.19	98.2816	728.579	7982.73	99.8434	2139.18	15722	139.244	706.327	7658.76	98.0714	702.351	7758.54	98.5748	825.935	8641.58	103.653	3439.34	0.104611	0.370049
		0.105	333	694.194	7710.19	98.2816	728.579	7982.73	99.8434	2139.18	15722	139.244	706.327	7658.76	98.0714	702.351	7758.54	98.5748	825.935	8641.58	103.653	3439.34	0.103683	1.25456
		0.105	343	694.194	7710.19	98.2816	728.579	7982.73	99.8434	2139.18	15722	139.244	706.327	7658.76	98.0714	702.351	7758.54	98.5748	825.935	8641.58	103.653	3439.34	0.102754	2.13908
		0.105	353	694.194	7710.19	98.2816	728.579	7982.73	99.8434	2139.18	15722	139.244	706.327	7658.76	98.0714	702.351	7758.54	98.5748	825.935	8641.58	103.653	3439.34	0.101825	3.02359
[C4mpyrr][NTf2]	Ge, R.; Hardacre, C.; Nancarrow, P.; Rooney, D. W. Thermal Conductivities of Ionic Liquids over the Temperature Range from 293 K to 353 K. J. Chem. Eng. Data 2007, 52, 1819.	0.125	293	694.194	2198.94	60.2143	728.579	2344.38	61.6904	2139.18	7682.48	103.856	706.327	2167.13	60.05	702.351	2231.79	60.5805	825.935	2727.4	65.5439	1420.03	0.123802	0.958105	4	1.72384	2.89709
		0.125	303	694.194	2198.94	60.2143	728.579	2344.38	61.6904	2139.18	7682.48	103.856	706.327	2167.13	60.05	702.351	2231.79	60.5805	825.935	2727.4	65.5439	1420.03	0.122838	1.72965
		0.124	313	694.194	2198.94	60.2143	728.579	2344.38	61.6904	2139.18	7682.48	103.856	706.327	2167.13	60.05	702.351	2231.79	60.5805	825.935	2727.4	65.5439	1420.03	0.121874	1.71491
		0.124	323	694.194	2198.94	60.2143	728.579	2344.38	61.6904	2139.18	7682.48	103.856	706.327	2167.13	60.05	702.351	2231.79	60.5805	825.935	2727.4	65.5439	1420.03	0.120909	2.49268
	Nieto De Castro, C. A.; Lourenco, M. J. V.; Ribeiro, A. P. C.; Langa, E.; Vieira, S. I. C.; Goodrich, P.; Hardacre, C. Thermal Properties of Ionic Liquids and Ionanofluids of Imidazolium and Pyrrolidinium Liquids. J. Chem. Eng. Data 2010, 55, 653.	0.118	293	694.194	2198.94	60.2143	728.579	2344.38	61.6904	2139.18	7682.48	103.856	706.327	2167.13	60.05	702.351	2231.79	60.5805	825.935	2727.4	65.5439	1420.03	0.123802	4.91726	5	3.63155
		0.118	303	694.194	2198.94	60.2143	728.579	2344.38	61.6904	2139.18	7682.48	103.856	706.327	2167.13	60.05	702.351	2231.79	60.5805	825.935	2727.4	65.5439	1420.03	0.122838	4.09995
		0.118	313	694.194	2198.94	60.2143	728.579	2344.38	61.6904	2139.18	7682.48	103.856	706.327	2167.13	60.05	702.351	2231.79	60.5805	825.935	2727.4	65.5439	1420.03	0.121874	3.28263
		0.117	323	694.194	2198.94	60.2143	728.579	2344.38	61.6904	2139.18	7682.48	103.856	706.327	2167.13	60.05	702.351	2231.79	60.5805	825.935	2727.4	65.5439	1420.03	0.120909	3.34109
		0.117	333	694.194	2198.94	60.2143	728.579	2344.38	61.6904	2139.18	7682.48	103.856	706.327	2167.13	60.05	702.351	2231.79	60.5805	825.935	2727.4	65.5439	1420.03	0.119945	2.51679
	Liu, H.; Maginn, E.; Visser, A. E.; Bridges, N. J.; Fox, E. B. Thermal and Transport Properties of Six Ionic Liquids: An Experimental and Molecular Dynamics Study. Ind. Eng. Chem. Res. 2012, 51, 7242.	0.125747	296.146	694.194	2198.94	60.2143	728.579	2344.38	61.6904	2139.18	7682.48	103.856	706.327	2167.13	60.05	702.351	2231.79	60.5805	825.935	2727.4	65.5439	1420.03	0.123499	1.78774	3	3.23732
		0.123223	312.62	694.194	2198.94	60.2143	728.579	2344.38	61.6904	2139.18	7682.48	103.856	706.327	2167.13	60.05	702.351	2231.79	60.5805	825.935	2727.4	65.5439	1420.03	0.12191	1.06508
		0.12884	332.402	694.194	2198.94	60.2143	728.579	2344.38	61.6904	2139.18	7682.48	103.856	706.327	2167.13	60.05	702.351	2231.79	60.5805	825.935	2727.4	65.5439	1420.03	0.120002	6.85914
[P4,4,4,16][FAP]	Ferreira, A. G. M.; Simões, P. N.; Ferreira, A. F.; Fonseca, M. A.; Oliveira, M. S. A.; Trino, A. S. M. Transport and Thermal Properties of Quaternary Phosphonium Ionic Liquids and IoNanofluids. J. Chem. Thermodyn. 2013, 64, 80.	0.126	282.19	73680.2	7710.19	317.69	73781.9	7982.73	318.286	78490.2	15722	338.617	73719.4	7658.76	317.666	73706.7	7758.54	317.814	74088.8	8641.58	319.85	28048.4	0.124767	0.978494	9	0.639863	0.639863
		0.125	292.99	73680.2	7710.19	317.69	73781.9	7982.73	318.286	78490.2	15722	338.617	73719.4	7658.76	317.666	73706.7	7758.54	317.814	74088.8	8641.58	319.85	28048.4	0.124234	0.612961
		0.125	298.41	73680.2	7710.19	317.69	73781.9	7982.73	318.286	78490.2	15722	338.617	73719.4	7658.76	317.666	73706.7	7758.54	317.814	74088.8	8641.58	319.85	28048.4	0.123966	0.82707
		0.125	303.54	73680.2	7710.19	317.69	73781.9	7982.73	318.286	78490.2	15722	338.617	73719.4	7658.76	317.666	73706.7	7758.54	317.814	74088.8	8641.58	319.85	28048.4	0.123713	1.02972
		0.123	314.37	73680.2	7710.19	317.69	73781.9	7982.73	318.286	78490.2	15722	338.617	73719.4	7658.76	317.666	73706.7	7758.54	317.814	74088.8	8641.58	319.85	28048.4	0.123178	0.144769
		0.123	325.65	73680.2	7710.19	317.69	73781.9	7982.73	318.286	78490.2	15722	338.617	73719.4	7658.76	317.666	73706.7	7758.54	317.814	74088.8	8641.58	319.85	28048.4	0.122621	0.308077
		0.123	334.58	73680.2	7710.19	317.69	73781.9	7982.73	318.286	78490.2	15722	338.617	73719.4	7658.76	317.666	73706.7	7758.54	317.814	74088.8	8641.58	319.85	28048.4	0.12218	0.66658
		0.123	344.18	73680.2	7710.19	317.69	73781.9	7982.73	318.286	78490.2	15722	338.617	73719.4	7658.76	317.666	73706.7	7758.54	317.814	74088.8	8641.58	319.85	28048.4	0.121706	1.05198
		0.121	355.07	73680.2	7710.19	317.69	73781.9	7982.73	318.286	78490.2	15722	338.617	73719.4	7658.76	317.666	73706.7	7758.54	317.814	74088.8	8641.58	319.85	28048.4	0.121168	0.139108
[P6,6,6,14][NTf2]	Ge, R.; Hardacre, C.; Nancarrow, P.; Rooney, D. W. Thermal Conductivities of Ionic Liquids over the Temperature Range from 293 K to 353 K. J. Chem. Eng. Data 2007, 52, 1819.	0.144	293	73680.2	2198.94	308.048	73781.9	2344.38	308.452	78490.2	7682.48	325.666	73719.4	2167.13	308.058	73706.7	2231.79	308.154	74088.8	2727.4	309.606	26038.2	0.141017	2.07161	7	1.40975	2.11902
		0.143	303	73680.2	2198.94	308.048	73781.9	2344.38	308.452	78490.2	7682.48	325.666	73719.4	2167.13	308.058	73706.7	2231.79	308.154	74088.8	2727.4	309.606	26038.2	0.140488	1.75695
		0.142	313	73680.2	2198.94	308.048	73781.9	2344.38	308.452	78490.2	7682.48	325.666	73719.4	2167.13	308.058	73706.7	2231.79	308.154	74088.8	2727.4	309.606	26038.2	0.139958	1.43786
		0.141	323	73680.2	2198.94	308.048	73781.9	2344.38	308.452	78490.2	7682.48	325.666	73719.4	2167.13	308.058	73706.7	2231.79	308.154	74088.8	2727.4	309.606	26038.2	0.139429	1.11425
		0.141	333	73680.2	2198.94	308.048	73781.9	2344.38	308.452	78490.2	7682.48	325.666	73719.4	2167.13	308.058	73706.7	2231.79	308.154	74088.8	2727.4	309.606	26038.2	0.1389	1.48965
		0.14	343	73680.2	2198.94	308.048	73781.9	2344.38	308.452	78490.2	7682.48	325.666	73719.4	2167.13	308.058	73706.7	2231.79	308.154	74088.8	2727.4	309.606	26038.2	0.13837	1.1641
		0.139	353	73680.2	2198.94	308.048	73781.9	2344.38	308.452	78490.2	7682.48	325.666	73719.4	2167.13	308.058	73706.7	2231.79	308.154	74088.8	2727.4	309.606	26038.2	0.137841	0.833855
	Ferreira, A. G. M.; Simões, P. N.; Ferreira, A. F.; Fonseca, M. A.; Oliveira, M. S. A.; Trino, A. S. M. Transport and Thermal Properties of Quaternary Phosphonium Ionic Liquids and IoNanofluids. J. Chem. Thermodyn. 2013, 64, 80.	0.139	285.65	73680.2	2198.94	308.048	73781.9	2344.38	308.452	78490.2	7682.48	325.666	73719.4	2167.13	308.058	73706.7	2231.79	308.154	74088.8	2727.4	309.606	26038.2	0.141406	1.73089	7	2.8283
		0.138	293.14	73680.2	2198.94	308.048	73781.9	2344.38	308.452	78490.2	7682.48	325.666	73719.4	2167.13	308.058	73706.7	2231.79	308.154	74088.8	2727.4	309.606	26038.2	0.141009	2.18078
		0.137	297.72	73680.2	2198.94	308.048	73781.9	2344.38	308.452	78490.2	7682.48	325.666	73719.4	2167.13	308.058	73706.7	2231.79	308.154	74088.8	2727.4	309.606	26038.2	0.140767	2.74967
		0.137	302.37	73680.2	2198.94	308.048	73781.9	2344.38	308.452	78490.2	7682.48	325.666	73719.4	2167.13	308.058	73706.7	2231.79	308.154	74088.8	2727.4	309.606	26038.2	0.140521	2.57001
		0.135	313.04	73680.2	2198.94	308.048	73781.9	2344.38	308.452	78490.2	7682.48	325.666	73719.4	2167.13	308.058	73706.7	2231.79	308.154	74088.8	2727.4	309.606	26038.2	0.139956	3.6712
		0.134	323.58	73680.2	2198.94	308.048	73781.9	2344.38	308.452	78490.2	7682.48	325.666	73719.4	2167.13	308.058	73706.7	2231.79	308.154	74088.8	2727.4	309.606	26038.2	0.139398	4.02852
		0.135	333.55	73680.2	2198.94	308.048	73781.9	2344.38	308.452	78490.2	7682.48	325.666	73719.4	2167.13	308.058	73706.7	2231.79	308.154	74088.8	2727.4	309.606	26038.2	0.13887	2.86702
[P4,4,4,16][Phosph]	Ferreira, A. G. M.; Simões, P. N.; Ferreira, A. F.; Fonseca, M. A.; Oliveira, M. S. A.; Trino, A. S. M. Transport and Thermal Properties of Quaternary Phosphonium Ionic Liquids and IoNanofluids. J. Chem. Thermodyn. 2013, 64, 80.	0.137	282.47	73680.2	7322.91	318.84	73781.9	7392.66	319.12	78490.2	10643.6	332.935	73719.4	7333.31	318.951	73706.7	7342.23	318.92	74088.8	7597.83	319.972	27612.7	0.136252	0.546227	9	1.0226	1.0226
		0.136	292.94	73680.2	7322.91	318.84	73781.9	7392.66	319.12	78490.2	10643.6	332.935	73719.4	7333.31	318.951	73706.7	7342.23	318.92	74088.8	7597.83	319.972	27612.7	0.135727	0.201027
		0.135	298.04	73680.2	7322.91	318.84	73781.9	7392.66	319.12	78490.2	10643.6	332.935	73719.4	7333.31	318.951	73706.7	7342.23	318.92	74088.8	7597.83	319.972	27612.7	0.135471	0.348771
		0.135	303.15	73680.2	7322.91	318.84	73781.9	7392.66	319.12	78490.2	10643.6	332.935	73719.4	7333.31	318.951	73706.7	7342.23	318.92	74088.8	7597.83	319.972	27612.7	0.135215	0.158945
		0.133	313.45	73680.2	7322.91	318.84	73781.9	7392.66	319.12	78490.2	10643.6	332.935	73719.4	7333.31	318.951	73706.7	7342.23	318.92	74088.8	7597.83	319.972	27612.7	0.134698	1.27672
		0.132	323.45	73680.2	7322.91	318.84	73781.9	7392.66	319.12	78490.2	10643.6	332.935	73719.4	7333.31	318.951	73706.7	7342.23	318.92	74088.8	7597.83	319.972	27612.7	0.134197	1.66405
		0.131	333.55	73680.2	7322.91	318.84	73781.9	7392.66	319.12	78490.2	10643.6	332.935	73719.4	7333.31	318.951	73706.7	7342.23	318.92	74088.8	7597.83	319.972	27612.7	0.13369	2.05346
		0.131	343.59	73680.2	7322.91	318.84	73781.9	7392.66	319.12	78490.2	10643.6	332.935	73719.4	7333.31	318.951	73706.7	7342.23	318.92	74088.8	7597.83	319.972	27612.7	0.133187	1.66911
		0.131	353.62	73680.2	7322.91	318.84	73781.9	7392.66	319.12	78490.2	10643.6	332.935	73719.4	7333.31	318.951	73706.7	7342.23	318.92	74088.8	7597.83	319.972	27612.7	0.132684	1.28514
[P6,6,6,14][Cl]	Ge, R.; Hardacre, C.; Nancarrow, P.; Rooney, D. W. Thermal Conductivities of Ionic Liquids over the Temperature Range from 293 K to 353 K. J. Chem. Eng. Data 2007, 52, 1819.	0.161	293	73680.2	3.4225	303.603	73781.9	9.9856	303.788	78490.2	1256.7	314.477	73719.4	1	303.666	73706.7	9	303.661	74088.8	49	304.385	25035	0.156325	2.90367	7	2.00278	2.00278
		0.16	303	73680.2	3.4225	303.603	73781.9	9.9856	303.788	78490.2	1256.7	314.477	73719.4	1	303.666	73706.7	9	303.661	74088.8	49	304.385	25035	0.155778	2.63873
		0.159	313	73680.2	3.4225	303.603	73781.9	9.9856	303.788	78490.2	1256.7	314.477	73719.4	1	303.666	73706.7	9	303.661	74088.8	49	304.385	25035	0.155231	2.37045
		0.157	323	73680.2	3.4225	303.603	73781.9	9.9856	303.788	78490.2	1256.7	314.477	73719.4	1	303.666	73706.7	9	303.661	74088.8	49	304.385	25035	0.154684	1.47521
		0.157	333	73680.2	3.4225	303.603	73781.9	9.9856	303.788	78490.2	1256.7	314.477	73719.4	1	303.666	73706.7	9	303.661	74088.8	49	304.385	25035	0.154137	1.82365
		0.156	343	73680.2	3.4225	303.603	73781.9	9.9856	303.788	78490.2	1256.7	314.477	73719.4	1	303.666	73706.7	9	303.661	74088.8	49	304.385	25035	0.15359	1.54499
		0.155	353	73680.2	3.4225	303.603	73781.9	9.9856	303.788	78490.2	1256.7	314.477	73719.4	1	303.666	73706.7	9	303.661	74088.8	49	304.385	25035	0.153043	1.26273
[P4,4,4,1][MeSO4]	Ferreira, A. G. M.; Simões, P. N.; Ferreira, A. F.; Fonseca, M. A.; Oliveira, M. S. A.; Trino, A. S. M. Transport and Thermal Properties of Quaternary Phosphonium Ionic Liquids and IoNanofluids. J. Chem. Thermodyn. 2013, 64, 80.	0.157	283.34	2691.94	107.281	58.7046	2734.34	152.556	59.4628	5179.34	2269.5	91.7441	2716.36	95.9101	58.8812	2704.57	120.152	58.9576	2868.98	285.017	61.7657	1239.75	0.14946	4.80268	9	5.15588	5.15588
		0.156	293.28	2691.94	107.281	58.7046	2734.34	152.556	59.4628	5179.34	2269.5	91.7441	2716.36	95.9101	58.8812	2704.57	120.152	58.9576	2868.98	285.017	61.7657	1239.75	0.148498	4.80898
		0.155	298.36	2691.94	107.281	58.7046	2734.34	152.556	59.4628	5179.34	2269.5	91.7441	2716.36	95.9101	58.8812	2704.57	120.152	58.9576	2868.98	285.017	61.7657	1239.75	0.148006	4.51198
		0.155	303.45	2691.94	107.281	58.7046	2734.34	152.556	59.4628	5179.34	2269.5	91.7441	2716.36	95.9101	58.8812	2704.57	120.152	58.9576	2868.98	285.017	61.7657	1239.75	0.147514	4.82973
		0.153	313.5	2691.94	107.281	58.7046	2734.34	152.556	59.4628	5179.34	2269.5	91.7441	2716.36	95.9101	58.8812	2704.57	120.152	58.9576	2868.98	285.017	61.7657	1239.75	0.146541	4.22127
		0.153	323.6	2691.94	107.281	58.7046	2734.34	152.556	59.4628	5179.34	2269.5	91.7441	2716.36	95.9101	58.8812	2704.57	120.152	58.9576	2868.98	285.017	61.7657	1239.75	0.145564	4.86002
		0.153	333.58	2691.94	107.281	58.7046	2734.34	152.556	59.4628	5179.34	2269.5	91.7441	2716.36	95.9101	58.8812	2704.57	120.152	58.9576	2868.98	285.017	61.7657	1239.75	0.144598	5.49118
		0.153	343.61	2691.94	107.281	58.7046	2734.34	152.556	59.4628	5179.34	2269.5	91.7441	2716.36	95.9101	58.8812	2704.57	120.152	58.9576	2868.98	285.017	61.7657	1239.75	0.143628	6.12551
		0.153	353.51	2691.94	107.281	58.7046	2734.34	152.556	59.4628	5179.34	2269.5	91.7441	2716.36	95.9101	58.8812	2704.57	120.152	58.9576	2868.98	285.017	61.7657	1239.75	0.14267	6.75161
[C4mim][BF4]	Tomida, D.; Kenmochi, S.; Tsukada, T.; Yokoyama, C. Measurements of Thermal Conductivity of 1-Butyl-3-methylimidazolium Tetrafluoroborate at High Pressure. Heat Transfer-Asian Research 2007, 36, 361.	0.169	294.7	783.9	51.8634	33.3267	821.761	111.107	34.7854	2278.84	1604.48	64.6478	785.231	43.6333	33.3467	793.069	63.241	33.6452	924.65	248.388	38.1445	486.003	0.171686	1.5893	3	0.721724	0.721724
		0.169	314.8	783.9	51.8634	33.3267	821.761	111.107	34.7854	2278.84	1604.48	64.6478	785.231	43.6333	33.3467	793.069	63.241	33.6452	924.65	248.388	38.1445	486.003	0.169714	0.422623
		0.168	334.9	783.9	51.8634	33.3267	821.761	111.107	34.7854	2278.84	1604.48	64.6478	785.231	43.6333	33.3467	793.069	63.241	33.6452	924.65	248.388	38.1445	486.003	0.167743	0.153246
[C6mim][BF4]	Nieto De Castro, C. A.; Lourenco, M. J. V.; Ribeiro, A. P. C.; Langa, E.; Vieira, S. I. C.; Goodrich, P.; Hardacre, C. Thermal Properties of Ionic Liquids and Ionanofluids of Imidazolium and Pyrrolidinium Liquids. J. Chem. Eng. Data 2010, 55, 653.	0.158	293	1778.31	51.8634	49.9114	1822.66	111.107	50.9611	3542.57	1604.48	76.4318	1775.46	43.6333	49.8698	1789.03	63.241	50.1398	1943.77	248.388	53.4883	839.184	0.163168	3.27081	7	3.67579	3.28436
		0.157	303	1778.31	51.8634	49.9114	1822.66	111.107	50.9611	3542.57	1604.48	76.4318	1775.46	43.6333	49.8698	1789.03	63.241	50.1398	1943.77	248.388	53.4883	839.184	0.162193	3.30776
		0.156	313	1778.31	51.8634	49.9114	1822.66	111.107	50.9611	3542.57	1604.48	76.4318	1775.46	43.6333	49.8698	1789.03	63.241	50.1398	1943.77	248.388	53.4883	839.184	0.161218	3.34518
		0.155	323	1778.31	51.8634	49.9114	1822.66	111.107	50.9611	3542.57	1604.48	76.4318	1775.46	43.6333	49.8698	1789.03	63.241	50.1398	1943.77	248.388	53.4883	839.184	0.160244	3.38309
		0.153	333	1778.31	51.8634	49.9114	1822.66	111.107	50.9611	3542.57	1604.48	76.4318	1775.46	43.6333	49.8698	1789.03	63.241	50.1398	1943.77	248.388	53.4883	839.184	0.159269	4.09744
		0.152	343	1778.31	51.8634	49.9114	1822.66	111.107	50.9611	3542.57	1604.48	76.4318	1775.46	43.6333	49.8698	1789.03	63.241	50.1398	1943.77	248.388	53.4883	839.184	0.158294	4.14105
		0.151	353	1778.31	51.8634	49.9114	1822.66	111.107	50.9611	3542.57	1604.48	76.4318	1775.46	43.6333	49.8698	1789.03	63.241	50.1398	1943.77	248.388	53.4883	839.184	0.15732	4.18523
	Tomida, D.; Kenmochi, S.; Tsukada, T.; Qiao, K.; Bao, Q. X.; Yokoyama, C. Viscosity and Thermal Conductivity of 1-Hexyl-3-methylimidazolium Tetrafluoroborate and 1-Octyl-3-methylimidazolium Tetrafluoroborate at Pressures up to 20 MPa. Int. J. Thermophys. 2012, 33, 959.	0.166	294.2	1778.31	51.8634	49.9114	1822.66	111.107	50.9611	3542.57	1604.48	76.4318	1775.46	43.6333	49.8698	1789.03	63.241	50.1398	1943.77	248.388	53.4883	839.184	0.163051	1.77656	3	2.37103
		0.165	314.3	1778.31	51.8634	49.9114	1822.66	111.107	50.9611	3542.57	1604.48	76.4318	1775.46	43.6333	49.8698	1789.03	63.241	50.1398	1943.77	248.388	53.4883	839.184	0.161092	2.36862
		0.164	334.4	1778.31	51.8634	49.9114	1822.66	111.107	50.9611	3542.57	1604.48	76.4318	1775.46	43.6333	49.8698	1789.03	63.241	50.1398	1943.77	248.388	53.4883	839.184	0.159133	2.96791
[C8mim][BF4]	Tomida, D.; Kenmochi, S.; Tsukada, T.; Qiao, K.; Bao, Q. X.; Yokoyama, C. Viscosity and Thermal Conductivity of 1-Hexyl-3-methylimidazolium Tetrafluoroborate and 1-Octyl-3-methylimidazolium Tetrafluoroborate at Pressures up to 20 MPa. Int. J. Thermophys. 2012, 33, 959.	0.164	294.2	3524.44	51.8634	70.2256	3575.35	111.107	71.0214	5558.63	1604.48	92.5435	3522.14	43.6333	70.2068	3536.71	63.241	70.3989	3715.02	248.388	72.9863	1444.58	0.164374	0.22785	3	0.295114	0.295114
		0.163	314.3	3524.44	51.8634	70.2256	3575.35	111.107	71.0214	5558.63	1604.48	92.5435	3522.14	43.6333	70.2068	3536.71	63.241	70.3989	3715.02	248.388	72.9863	1444.58	0.162436	0.345987
		0.16	334.4	3524.44	51.8634	70.2256	3575.35	111.107	71.0214	5558.63	1604.48	92.5435	3522.14	43.6333	70.2068	3536.71	63.241	70.3989	3715.02	248.388	72.9863	1444.58	0.160498	0.311505
[C4mim][PF6]	Nieto De Castro, C. A.; Lourenco, M. J. V.; Ribeiro, A. P. C.; Langa, E.; Vieira, S. I. C.; Goodrich, P.; Hardacre, C. Thermal Properties of Ionic Liquids and Ionanofluids of Imidazolium and Pyrrolidinium Liquids. J. Chem. Eng. Data 2010, 55, 653.	0.145	293	783.9	125.135	34.5393	821.761	211.514	36.309	2278.84	3223.46	76.2864	785.231	111.678	34.4674	793.069	142.086	34.9428	924.65	430.419	40.5586	604.936	0.149662	3.21502	7	1.88867	1.91074
		0.145	303	783.9	125.135	34.5393	821.761	211.514	36.309	2278.84	3223.46	76.2864	785.231	111.678	34.4674	793.069	142.086	34.9428	924.65	430.419	40.5586	604.936	0.148683	2.53996
		0.145	313	783.9	125.135	34.5393	821.761	211.514	36.309	2278.84	3223.46	76.2864	785.231	111.678	34.4674	793.069	142.086	34.9428	924.65	430.419	40.5586	604.936	0.147704	1.8649
		0.144	323	783.9	125.135	34.5393	821.761	211.514	36.309	2278.84	3223.46	76.2864	785.231	111.678	34.4674	793.069	142.086	34.9428	924.65	430.419	40.5586	604.936	0.146725	1.89255
		0.143	333	783.9	125.135	34.5393	821.761	211.514	36.309	2278.84	3223.46	76.2864	785.231	111.678	34.4674	793.069	142.086	34.9428	924.65	430.419	40.5586	604.936	0.145746	1.92059
		0.143	343	783.9	125.135	34.5393	821.761	211.514	36.309	2278.84	3223.46	76.2864	785.231	111.678	34.4674	793.069	142.086	34.9428	924.65	430.419	40.5586	604.936	0.144768	1.23608
		0.143	353	783.9	125.135	34.5393	821.761	211.514	36.309	2278.84	3223.46	76.2864	785.231	111.678	34.4674	793.069	142.086	34.9428	924.65	430.419	40.5586	604.936	0.143789	0.551583
	Tomida, D.; Kenmochi, S.; Tsukada, T.; Qiao, K.; Yokoyama, C. Thermal Conductivities of [bmim][PF6], [hmim][PF6], and [omim][PF6] from 294 to 335 K at Pressures up to 20 MPa. Int. J. Thermophys. 2007, 28, 1147.	0.145	294.9	783.9	125.135	34.5393	821.761	211.514	36.309	2278.84	3223.46	76.2864	785.231	111.678	34.4674	793.069	142.086	34.9428	924.65	430.419	40.5586	604.936	0.149476	3.08676	3	1.96224
		0.145	315	783.9	125.135	34.5393	821.761	211.514	36.309	2278.84	3223.46	76.2864	785.231	111.678	34.4674	793.069	142.086	34.9428	924.65	430.419	40.5586	604.936	0.147508	1.72989
		0.144	335.1	783.9	125.135	34.5393	821.761	211.514	36.309	2278.84	3223.46	76.2864	785.231	111.678	34.4674	793.069	142.086	34.9428	924.65	430.419	40.5586	604.936	0.145541	1.07006
[C6mim][PF6]	Nieto De Castro, C. A.; Lourenco, M. J. V.; Ribeiro, A. P. C.; Langa, E.; Vieira, S. I. C.; Goodrich, P.; Hardacre, C. Thermal Properties of Ionic Liquids and Ionanofluids of Imidazolium and Pyrrolidinium Liquids. J. Chem. Eng. Data 2010, 55, 653.	0.142	293	1778.31	125.135	50.7291	1822.66	211.514	52.0129	3542.57	3223.46	86.4991	1775.46	111.678	50.6261	1789.03	142.086	51.0196	1943.77	430.419	55.2359	957.901	0.141853	0.10338	7	0.560489	1.41611
		0.141	303	1778.31	125.135	50.7291	1822.66	211.514	52.0129	3542.57	3223.46	86.4991	1775.46	111.678	50.6261	1789.03	142.086	51.0196	1943.77	430.419	55.2359	957.901	0.140881	0.0846792
		0.141	313	1778.31	125.135	50.7291	1822.66	211.514	52.0129	3542.57	3223.46	86.4991	1775.46	111.678	50.6261	1789.03	142.086	51.0196	1943.77	430.419	55.2359	957.901	0.139908	0.774465
		0.139	323	1778.31	125.135	50.7291	1822.66	211.514	52.0129	3542.57	3223.46	86.4991	1775.46	111.678	50.6261	1789.03	142.086	51.0196	1943.77	430.419	55.2359	957.901	0.138935	0.0464705
		0.139	333	1778.31	125.135	50.7291	1822.66	211.514	52.0129	3542.57	3223.46	86.4991	1775.46	111.678	50.6261	1789.03	142.086	51.0196	1943.77	430.419	55.2359	957.901	0.137963	0.746181
		0.138	343	1778.31	125.135	50.7291	1822.66	211.514	52.0129	3542.57	3223.46	86.4991	1775.46	111.678	50.6261	1789.03	142.086	51.0196	1943.77	430.419	55.2359	957.901	0.13699	0.731732
		0.138	353	1778.31	125.135	50.7291	1822.66	211.514	52.0129	3542.57	3223.46	86.4991	1775.46	111.678	50.6261	1789.03	142.086	51.0196	1943.77	430.419	55.2359	957.901	0.136018	1.43651
	Tomida, D.; Kenmochi, S.; Tsukada, T.; Qiao, K.; Yokoyama, C. Thermal Conductivities of [bmim][PF6], [hmim][PF6], and [omim][PF6] from 294 to 335 K at Pressures up to 20 MPa. Int. J. Thermophys. 2007, 28, 1147.	0.145	294.1	1778.31	125.135	50.7291	1822.66	211.514	52.0129	3542.57	3223.46	86.4991	1775.46	111.678	50.6261	1789.03	142.086	51.0196	1943.77	430.419	55.2359	957.901	0.141746	2.24399	3	3.41255
		0.145	315.1	1778.31	125.135	50.7291	1822.66	211.514	52.0129	3542.57	3223.46	86.4991	1775.46	111.678	50.6261	1789.03	142.086	51.0196	1943.77	430.419	55.2359	957.901	0.139704	3.65258
		0.144	335.2	1778.31	125.135	50.7291	1822.66	211.514	52.0129	3542.57	3223.46	86.4991	1775.46	111.678	50.6261	1789.03	142.086	51.0196	1943.77	430.419	55.2359	957.901	0.137749	4.34109
[C8mim][PF6]	Tomida, D.; Kenmochi, S.; Tsukada, T.; Qiao, K.; Yokoyama, C. Thermal Conductivities of [bmim][PF6], [hmim][PF6], and [omim][PF6] from 294 to 335 K at Pressures up to 20 MPa. Int. J. Thermophys. 2007, 28, 1147.	0.145	295.1	3524.44	125.135	70.8091	3575.35	211.514	71.7799	5558.63	3223.46	101.018	3522.14	111.678	70.746	3536.71	142.086	71.0282	3715.02	430.419	74.2765	1563.12	0.147241	1.54529	3	0.730659	0.730659
		0.145	315.1	3524.44	125.135	70.8091	3575.35	211.514	71.7799	5558.63	3223.46	101.018	3522.14	111.678	70.746	3536.71	142.086	71.0282	3715.02	430.419	74.2765	1563.12	0.145317	0.218525
		0.144	335.2	3524.44	125.135	70.8091	3575.35	211.514	71.7799	5558.63	3223.46	101.018	3522.14	111.678	70.746	3536.71	142.086	71.0282	3715.02	430.419	74.2765	1563.12	0.143383	0.428167
[C2mim][CH3COO]	Froba, A. P.; Rausch, M. H.; Krzeminski, K.; Assenbaum, D.; Wasserscheid, P.; Leipertz, A. Thermal Conductivity of Ionic Liquids: Measurement and Prediction. Int. J. Thermophys. 2010, 31, 2059.	0.2137	273.15	289.862	31.523	20.3553	321.575	57.9959	21.7755	1514.46	821.689	49.381	285.602	25.3247	20.347	297.563	37.3303	20.6882	407.03	125.15	25.0998	242.931	0.20672	3.26644	9	2.23234	2.23234
		0.2124	283.15	289.862	31.523	20.3553	321.575	57.9959	21.7755	1514.46	821.689	49.381	285.602	25.3247	20.347	297.563	37.3303	20.6882	407.03	125.15	25.0998	242.931	0.205734	3.13823
		0.211	293.15	289.862	31.523	20.3553	321.575	57.9959	21.7755	1514.46	821.689	49.381	285.602	25.3247	20.347	297.563	37.3303	20.6882	407.03	125.15	25.0998	242.931	0.204749	2.96249
		0.2102	303.15	289.862	31.523	20.3553	321.575	57.9959	21.7755	1514.46	821.689	49.381	285.602	25.3247	20.347	297.563	37.3303	20.6882	407.03	125.15	25.0998	242.931	0.203764	3.06188
		0.2066	313.15	289.862	31.523	20.3553	321.575	57.9959	21.7755	1514.46	821.689	49.381	285.602	25.3247	20.347	297.563	37.3303	20.6882	407.03	125.15	25.0998	242.931	0.202779	1.84962
		0.2026	323.15	289.862	31.523	20.3553	321.575	57.9959	21.7755	1514.46	821.689	49.381	285.602	25.3247	20.347	297.563	37.3303	20.6882	407.03	125.15	25.0998	242.931	0.201793	0.398099
		0.2002	333.15	289.862	31.523	20.3553	321.575	57.9959	21.7755	1514.46	821.689	49.381	285.602	25.3247	20.347	297.563	37.3303	20.6882	407.03	125.15	25.0998	242.931	0.200808	0.303805
		0.1973	343.15	289.862	31.523	20.3553	321.575	57.9959	21.7755	1514.46	821.689	49.381	285.602	25.3247	20.347	297.563	37.3303	20.6882	407.03	125.15	25.0998	242.931	0.199823	1.27875
		0.1915	353.15	289.862	31.523	20.3553	321.575	57.9959	21.7755	1514.46	821.689	49.381	285.602	25.3247	20.347	297.563	37.3303	20.6882	407.03	125.15	25.0998	242.931	0.198838	3.83172
[C2mim][DCA]	Froba, A. P.; Rausch, M. H.; Krzeminski, K.; Assenbaum, D.; Wasserscheid, P.; Leipertz, A. Thermal Conductivity of Ionic Liquids: Measurement and Prediction. Int. J. Thermophys. 2010, 31, 2059.	0.2053	273.15	289.862	81.3496	22.0719	321.575	108.877	23.4143	1514.46	944.679	50.8461	285.602	68.6945	21.7945	297.563	88.2503	22.4054	407.03	1.74788	22.3175	254.03	0.203282	0.98315	9	1.16809	1.16809
		0.205	283.15	289.862	81.3496	22.0719	321.575	108.877	23.4143	1514.46	944.679	50.8461	285.602	68.6945	21.7945	297.563	88.2503	22.4054	407.03	1.74788	22.3175	254.03	0.202297	1.31875
		0.2021	293.15	289.862	81.3496	22.0719	321.575	108.877	23.4143	1514.46	944.679	50.8461	285.602	68.6945	21.7945	297.563	88.2503	22.4054	407.03	1.74788	22.3175	254.03	0.201312	0.390145
		0.2022	303.15	289.862	81.3496	22.0719	321.575	108.877	23.4143	1514.46	944.679	50.8461	285.602	68.6945	21.7945	297.563	88.2503	22.4054	407.03	1.74788	22.3175	254.03	0.200326	0.926569
		0.1986	313.15	289.862	81.3496	22.0719	321.575	108.877	23.4143	1514.46	944.679	50.8461	285.602	68.6945	21.7945	297.563	88.2503	22.4054	407.03	1.74788	22.3175	254.03	0.199341	0.373333
		0.1958	323.15	289.862	81.3496	22.0719	321.575	108.877	23.4143	1514.46	944.679	50.8461	285.602	68.6945	21.7945	297.563	88.2503	22.4054	407.03	1.74788	22.3175	254.03	0.198356	1.30562
		0.1942	333.15	289.862	81.3496	22.0719	321.575	108.877	23.4143	1514.46	944.679	50.8461	285.602	68.6945	21.7945	297.563	88.2503	22.4054	407.03	1.74788	22.3175	254.03	0.197371	1.63304
		0.1935	343.15	289.862	81.3496	22.0719	321.575	108.877	23.4143	1514.46	944.679	50.8461	285.602	68.6945	21.7945	297.563	88.2503	22.4054	407.03	1.74788	22.3175	254.03	0.196386	1.49164
		0.1914	353.15	289.862	81.3496	22.0719	321.575	108.877	23.4143	1514.46	944.679	50.8461	285.602	68.6945	21.7945	297.563	88.2503	22.4054	407.03	1.74788	22.3175	254.03	0.195401	2.09054
[C2mim][C(CN)3]	Froba, A. P.; Rausch, M. H.; Krzeminski, K.; Assenbaum, D.; Wasserscheid, P.; Leipertz, A. Thermal Conductivity of Ionic Liquids: Measurement and Prediction. Int. J. Thermophys. 2010, 31, 2059.	0.1956	273.15	289.862	222.768	25.6447	321.575	257.604	26.9302	1514.46	1367.68	55.1163	285.602	204.403	25.2784	297.563	231.512	25.9615	407.03	342.682	29.9833	329.537	0.192289	1.69292	9	1.08051	1.08051
		0.1957	283.15	289.862	222.768	25.6447	321.575	257.604	26.9302	1514.46	1367.68	55.1163	285.602	204.403	25.2784	297.563	231.512	25.9615	407.03	342.682	29.9833	329.537	0.191305	2.24582
		0.193	293.15	289.862	222.768	25.6447	321.575	257.604	26.9302	1514.46	1367.68	55.1163	285.602	204.403	25.2784	297.563	231.512	25.9615	407.03	342.682	29.9833	329.537	0.190321	1.38796
		0.1918	303.15	289.862	222.768	25.6447	321.575	257.604	26.9302	1514.46	1367.68	55.1163	285.602	204.403	25.2784	297.563	231.512	25.9615	407.03	342.682	29.9833	329.537	0.189338	1.28387
		0.19	313.15	289.862	222.768	25.6447	321.575	257.604	26.9302	1514.46	1367.68	55.1163	285.602	204.403	25.2784	297.563	231.512	25.9615	407.03	342.682	29.9833	329.537	0.188354	0.866408
		0.1873	323.15	289.862	222.768	25.6447	321.575	257.604	26.9302	1514.46	1367.68	55.1163	285.602	204.403	25.2784	297.563	231.512	25.9615	407.03	342.682	29.9833	329.537	0.18737	0.0374374
		0.1868	333.15	289.862	222.768	25.6447	321.575	257.604	26.9302	1514.46	1367.68	55.1163	285.602	204.403	25.2784	297.563	231.512	25.9615	407.03	342.682	29.9833	329.537	0.186386	0.221405
		0.1847	343.15	289.862	222.768	25.6447	321.575	257.604	26.9302	1514.46	1367.68	55.1163	285.602	204.403	25.2784	297.563	231.512	25.9615	407.03	342.682	29.9833	329.537	0.185403	0.380461
		0.1815	353.15	289.862	222.768	25.6447	321.575	257.604	26.9302	1514.46	1367.68	55.1163	285.602	204.403	25.2784	297.563	231.512	25.9615	407.03	342.682	29.9833	329.537	0.184419	1.60827
[C2mim][MeOHPO2]	Froba, A. P.; Rausch, M. H.; Krzeminski, K.; Assenbaum, D.; Wasserscheid, P.; Leipertz, A. Thermal Conductivity of Ionic Liquids: Measurement and Prediction. Int. J. Thermophys. 2010, 31, 2059.	0.1941	273.15	289.862	55.565	21.0397	321.575	101.426	23.0282	1514.46	1915.04	59.627	285.602	47.9123	21	297.563	66.7219	21.5174	407.03	191.421	26.4764	314.826	0.19395	0.0771306	9	1.27257	1.27257
		0.1948	283.15	289.862	55.565	21.0397	321.575	101.426	23.0282	1514.46	1915.04	59.627	285.602	47.9123	21	297.563	66.7219	21.5174	407.03	191.421	26.4764	314.826	0.192966	0.941311
		0.1914	293.15	289.862	55.565	21.0397	321.575	101.426	23.0282	1514.46	1915.04	59.627	285.602	47.9123	21	297.563	66.7219	21.5174	407.03	191.421	26.4764	314.826	0.191982	0.304264
		0.1959	303.15	289.862	55.565	21.0397	321.575	101.426	23.0282	1514.46	1915.04	59.627	285.602	47.9123	21	297.563	66.7219	21.5174	407.03	191.421	26.4764	314.826	0.190998	2.50209
		0.1915	313.15	289.862	55.565	21.0397	321.575	101.426	23.0282	1514.46	1915.04	59.627	285.602	47.9123	21	297.563	66.7219	21.5174	407.03	191.421	26.4764	314.826	0.190014	0.775753
		0.1906	323.15	289.862	55.565	21.0397	321.575	101.426	23.0282	1514.46	1915.04	59.627	285.602	47.9123	21	297.563	66.7219	21.5174	407.03	191.421	26.4764	314.826	0.18903	0.823468
		0.1908	333.15	289.862	55.565	21.0397	321.575	101.426	23.0282	1514.46	1915.04	59.627	285.602	47.9123	21	297.563	66.7219	21.5174	407.03	191.421	26.4764	314.826	0.188047	1.44313
		0.1917	343.15	289.862	55.565	21.0397	321.575	101.426	23.0282	1514.46	1915.04	59.627	285.602	47.9123	21	297.563	66.7219	21.5174	407.03	191.421	26.4764	314.826	0.187063	2.41912
		0.1902	353.15	289.862	55.565	21.0397	321.575	101.426	23.0282	1514.46	1915.04	59.627	285.602	47.9123	21	297.563	66.7219	21.5174	407.03	191.421	26.4764	314.826	0.186079	2.16689
[C4bim][NTf2]	Froba, A. P.; Rausch, M. H.; Krzeminski, K.; Assenbaum, D.; Wasserscheid, P.; Leipertz, A. Thermal Conductivity of Ionic Liquids: Measurement and Prediction. Int. J. Thermophys. 2010, 31, 2059.	0.1209	273.15	2309.16	2198.94	76.0295	2355.52	2344.38	77.2913	4193.89	7682.48	115.831	2309.64	2167.13	75.8353	2320.29	2231.79	76.3413	2483.64	2727.4	80.6164	1990.34	0.124372	2.87199	9	1.76364	1.76364
		0.1203	283.15	2309.16	2198.94	76.0295	2355.52	2344.38	77.2913	4193.89	7682.48	115.831	2309.64	2167.13	75.8353	2320.29	2231.79	76.3413	2483.64	2727.4	80.6164	1990.34	0.123418	2.59176
		0.1188	293.15	2309.16	2198.94	76.0295	2355.52	2344.38	77.2913	4193.89	7682.48	115.831	2309.64	2167.13	75.8353	2320.29	2231.79	76.3413	2483.64	2727.4	80.6164	1990.34	0.122464	3.08378
		0.1198	303.15	2309.16	2198.94	76.0295	2355.52	2344.38	77.2913	4193.89	7682.48	115.831	2309.64	2167.13	75.8353	2320.29	2231.79	76.3413	2483.64	2727.4	80.6164	1990.34	0.121509	1.4267
		0.1176	313.15	2309.16	2198.94	76.0295	2355.52	2344.38	77.2913	4193.89	7682.48	115.831	2309.64	2167.13	75.8353	2320.29	2231.79	76.3413	2483.64	2727.4	80.6164	1990.34	0.120555	2.51261
		0.1176	323.15	2309.16	2198.94	76.0295	2355.52	2344.38	77.2913	4193.89	7682.48	115.831	2309.64	2167.13	75.8353	2320.29	2231.79	76.3413	2483.64	2727.4	80.6164	1990.34	0.1196	1.70109
		0.1176	333.15	2309.16	2198.94	76.0295	2355.52	2344.38	77.2913	4193.89	7682.48	115.831	2309.64	2167.13	75.8353	2320.29	2231.79	76.3413	2483.64	2727.4	80.6164	1990.34	0.118646	0.88957
		0.1171	343.15	2309.16	2198.94	76.0295	2355.52	2344.38	77.2913	4193.89	7682.48	115.831	2309.64	2167.13	75.8353	2320.29	2231.79	76.3413	2483.64	2727.4	80.6164	1990.34	0.117692	0.505366
		0.1164	353.15	2309.16	2198.94	76.0295	2355.52	2344.38	77.2913	4193.89	7682.48	115.831	2309.64	2167.13	75.8353	2320.29	2231.79	76.3413	2483.64	2727.4	80.6164	1990.34	0.116737	0.289891
[N8,8,8,1][NTf2]	Froba, A. P.; Rausch, M. H.; Krzeminski, K.; Assenbaum, D.; Wasserscheid, P.; Leipertz, A. Thermal Conductivity of Ionic Liquids: Measurement and Prediction. Int. J. Thermophys. 2010, 31, 2059.	0.1314	273.15	32521.1	2198.94	207.093	32604.4	2344.38	207.653	36072.2	7682.48	228.701	32554.9	2167.13	207.099	32540.6	2231.79	207.229	32844	2727.4	209.194	12208.7	0.129892	1.14739	9	0.65882	0.65882
		0.1291	283.15	32521.1	2198.94	207.093	32604.4	2344.38	207.653	36072.2	7682.48	228.701	32554.9	2167.13	207.099	32540.6	2231.79	207.229	32844	2727.4	209.194	12208.7	0.129119	0.0143893
		0.1299	293.15	32521.1	2198.94	207.093	32604.4	2344.38	207.653	36072.2	7682.48	228.701	32554.9	2167.13	207.099	32540.6	2231.79	207.229	32844	2727.4	209.194	12208.7	0.128345	1.19721
		0.1283	303.15	32521.1	2198.94	207.093	32604.4	2344.38	207.653	36072.2	7682.48	228.701	32554.9	2167.13	207.099	32540.6	2231.79	207.229	32844	2727.4	209.194	12208.7	0.127571	0.568139
		0.1266	313.15	32521.1	2198.94	207.093	32604.4	2344.38	207.653	36072.2	7682.48	228.701	32554.9	2167.13	207.099	32540.6	2231.79	207.229	32844	2727.4	209.194	12208.7	0.126797	0.155868
		0.1247	323.15	32521.1	2198.94	207.093	32604.4	2344.38	207.653	36072.2	7682.48	228.701	32554.9	2167.13	207.099	32540.6	2231.79	207.229	32844	2727.4	209.194	12208.7	0.126024	1.06141
		0.1244	333.15	32521.1	2198.94	207.093	32604.4	2344.38	207.653	36072.2	7682.48	228.701	32554.9	2167.13	207.099	32540.6	2231.79	207.229	32844	2727.4	209.194	12208.7	0.12525	0.683143
		0.1242	343.15	32521.1	2198.94	207.093	32604.4	2344.38	207.653	36072.2	7682.48	228.701	32554.9	2167.13	207.099	32540.6	2231.79	207.229	32844	2727.4	209.194	12208.7	0.124476	0.222287
		0.1248	353.15	32521.1	2198.94	207.093	32604.4	2344.38	207.653	36072.2	7682.48	228.701	32554.9	2167.13	207.099	32540.6	2231.79	207.229	32844	2727.4	209.194	12208.7	0.123702	0.879542
[N4,4,4,1][Ser]	Gardas, R. L.; Ge, R.; Goodrich, P.; Hardacre, C.; Hussain, A.; Rooney, D. W. Thermophysical Properties of Amino Acid-Based Ionic Liquids. J. Chem. Eng. Data 2010, 55, 1505.	0.169	298.15	2691	202.374	59.7346	2737.2	249.897	60.5312	4659.61	1581.96	83.5129	2716.36	190.937	59.8999	2701.91	213.116	59.9166	2868.98	366.464	62.6099	1198.11	0.166041	1.75095	7	1.4744	1.4744
		0.168	303.15	2691	202.374	59.7346	2737.2	249.897	60.5312	4659.61	1581.96	83.5129	2716.36	190.937	59.8999	2701.91	213.116	59.9166	2868.98	366.464	62.6099	1198.11	0.165557	1.45433
		0.167	313.15	2691	202.374	59.7346	2737.2	249.897	60.5312	4659.61	1581.96	83.5129	2716.36	190.937	59.8999	2701.91	213.116	59.9166	2868.98	366.464	62.6099	1198.11	0.164588	1.44409
		0.166	323.15	2691	202.374	59.7346	2737.2	249.897	60.5312	4659.61	1581.96	83.5129	2716.36	190.937	59.8999	2701.91	213.116	59.9166	2868.98	366.464	62.6099	1198.11	0.16362	1.43372
		0.165	333.15	2691	202.374	59.7346	2737.2	249.897	60.5312	4659.61	1581.96	83.5129	2716.36	190.937	59.8999	2701.91	213.116	59.9166	2868.98	366.464	62.6099	1198.11	0.162652	1.42323
		0.164	343.15	2691	202.374	59.7346	2737.2	249.897	60.5312	4659.61	1581.96	83.5129	2716.36	190.937	59.8999	2701.91	213.116	59.9166	2868.98	366.464	62.6099	1198.11	0.161683	1.41261
		0.163	353.15	2691	202.374	59.7346	2737.2	249.897	60.5312	4659.61	1581.96	83.5129	2716.36	190.937	59.8999	2701.91	213.116	59.9166	2868.98	366.464	62.6099	1198.11	0.160715	1.40186
[N4,4,4,1][Tau]	Gardas, R. L.; Ge, R.; Goodrich, P.; Hardacre, C.; Hussain, A.; Rooney, D. W. Thermophysical Properties of Amino Acid-Based Ionic Liquids. J. Chem. Eng. Data 2010, 55, 1505.	0.161	298.15	2691	202.649	59.7696	2737.2	249.518	60.5655	4659.61	2432.11	88.6716	2716.36	191.306	59.95	2701.91	216.344	59.9917	2868.98	382.727	62.8013	1246.75	0.16131	0.192313	7	0.521543	0.521543
		0.16	303.15	2691	202.649	59.7696	2737.2	249.518	60.5655	4659.61	2432.11	88.6716	2716.36	191.306	59.95	2701.91	216.344	59.9917	2868.98	382.727	62.8013	1246.75	0.160826	0.516173
		0.159	313.15	2691	202.649	59.7696	2737.2	249.518	60.5655	4659.61	2432.11	88.6716	2716.36	191.306	59.95	2701.91	216.344	59.9917	2868.98	382.727	62.8013	1246.75	0.159858	0.539864
		0.158	323.15	2691	202.649	59.7696	2737.2	249.518	60.5655	4659.61	2432.11	88.6716	2716.36	191.306	59.95	2701.91	216.344	59.9917	2868.98	382.727	62.8013	1246.75	0.158891	0.563855
		0.157	333.15	2691	202.649	59.7696	2737.2	249.518	60.5655	4659.61	2432.11	88.6716	2716.36	191.306	59.95	2701.91	216.344	59.9917	2868.98	382.727	62.8013	1246.75	0.157923	0.588152
		0.156	343.15	2691	202.649	59.7696	2737.2	249.518	60.5655	4659.61	2432.11	88.6716	2716.36	191.306	59.95	2701.91	216.344	59.9917	2868.98	382.727	62.8013	1246.75	0.156956	0.61276
		0.155	353.15	2691	202.649	59.7696	2737.2	249.518	60.5655	4659.61	2432.11	88.6716	2716.36	191.306	59.95	2701.91	216.344	59.9917	2868.98	382.727	62.8013	1246.75	0.155988	0.637685
[N4,4,4,1][Lys]	Gardas, R. L.; Ge, R.; Goodrich, P.; Hardacre, C.; Hussain, A.; Rooney, D. W. Thermophysical Properties of Amino Acid-Based Ionic Liquids. J. Chem. Eng. Data 2010, 55, 1505.	0.171	298.15	2691	908.61	67.2624	2737.2	962.631	68.0216	4659.61	2643.91	91.0681	2716.36	898.772	67.4463	2701.91	921.417	67.4389	2868.98	1097.47	70.0214	1457.73	0.1641	4.03499	7	3.79578	3.79578
		0.17	303.15	2691	908.61	67.2624	2737.2	962.631	68.0216	4659.61	2643.91	91.0681	2716.36	898.772	67.4463	2701.91	921.417	67.4389	2868.98	1097.47	70.0214	1457.73	0.163618	3.75395
		0.169	313.15	2691	908.61	67.2624	2737.2	962.631	68.0216	4659.61	2643.91	91.0681	2716.36	898.772	67.4463	2701.91	921.417	67.4389	2868.98	1097.47	70.0214	1457.73	0.162655	3.75472
		0.168	323.15	2691	908.61	67.2624	2737.2	962.631	68.0216	4659.61	2643.91	91.0681	2716.36	898.772	67.4463	2701.91	921.417	67.4389	2868.98	1097.47	70.0214	1457.73	0.161691	3.7555
		0.167	333.15	2691	908.61	67.2624	2737.2	962.631	68.0216	4659.61	2643.91	91.0681	2716.36	898.772	67.4463	2701.91	921.417	67.4389	2868.98	1097.47	70.0214	1457.73	0.160727	3.75629
		0.166	343.15	2691	908.61	67.2624	2737.2	962.631	68.0216	4659.61	2643.91	91.0681	2716.36	898.772	67.4463	2701.91	921.417	67.4389	2868.98	1097.47	70.0214	1457.73	0.159763	3.75709
		0.165	353.15	2691	908.61	67.2624	2737.2	962.631	68.0216	4659.61	2643.91	91.0681	2716.36	898.772	67.4463	2701.91	921.417	67.4389	2868.98	1097.47	70.0214	1457.73	0.158799	3.7579
[N4,4,4,1][Thr]	Gardas, R. L.; Ge, R.; Goodrich, P.; Hardacre, C.; Hussain, A.; Rooney, D. W. Thermophysical Properties of Amino Acid-Based Ionic Liquids. J. Chem. Eng. Data 2010, 55, 1505.	0.16	298.15	2691	302.156	60.7409	2737.2	352.483	61.551	4659.61	1820.55	85.0685	2716.36	291.004	60.9262	2701.91	313.63	60.9262	2868.98	477.559	63.671	1240.3	0.164312	2.69521	7	3.0746	3.0746
		0.159	303.15	2691	302.156	60.7409	2737.2	352.483	61.551	4659.61	1820.55	85.0685	2716.36	291.004	60.9262	2701.91	313.63	60.9262	2868.98	477.559	63.671	1240.3	0.163829	3.03682
		0.158	313.15	2691	302.156	60.7409	2737.2	352.483	61.551	4659.61	1820.55	85.0685	2716.36	291.004	60.9262	2701.91	313.63	60.9262	2868.98	477.559	63.671	1240.3	0.162861	3.07654
		0.157	323.15	2691	302.156	60.7409	2737.2	352.483	61.551	4659.61	1820.55	85.0685	2716.36	291.004	60.9262	2701.91	313.63	60.9262	2868.98	477.559	63.671	1240.3	0.161893	3.11677
		0.156	333.15	2691	302.156	60.7409	2737.2	352.483	61.551	4659.61	1820.55	85.0685	2716.36	291.004	60.9262	2701.91	313.63	60.9262	2868.98	477.559	63.671	1240.3	0.160926	3.15751
		0.155	343.15	2691	302.156	60.7409	2737.2	352.483	61.551	4659.61	1820.55	85.0685	2716.36	291.004	60.9262	2701.91	313.63	60.9262	2868.98	477.559	63.671	1240.3	0.159958	3.19878
		0.154	353.15	2691	302.156	60.7409	2737.2	352.483	61.551	4659.61	1820.55	85.0685	2716.36	291.004	60.9262	2701.91	313.63	60.9262	2868.98	477.559	63.671	1240.3	0.158991	3.24059
[P4,4,4,4][Ser]	Gardas, R. L.; Ge, R.; Goodrich, P.; Hardacre, C.; Hussain, A.; Rooney, D. W. Thermophysical Properties of Amino Acid-Based Ionic Liquids. J. Chem. Eng. Data 2010, 55, 1505.	0.161	298.15	4840.82	202.374	77.4164	4892.59	249.897	78.0582	7659.9	1581.96	102.878	4868.89	190.937	77.55	4855.49	213.116	77.5951	5053.85	366.464	79.8874	1970.54	0.158063	1.82391	7	1.51228	1.51228
		0.16	303.15	4840.82	202.374	77.4164	4892.59	249.897	78.0582	7659.9	1581.96	102.878	4868.89	190.937	77.55	4855.49	213.116	77.5951	5053.85	366.464	79.8874	1970.54	0.157586	1.50866
		0.159	313.15	4840.82	202.374	77.4164	4892.59	249.897	78.0582	7659.9	1581.96	102.878	4868.89	190.937	77.55	4855.49	213.116	77.5951	5053.85	366.464	79.8874	1970.54	0.156631	1.48966
		0.158	323.15	4840.82	202.374	77.4164	4892.59	249.897	78.0582	7659.9	1581.96	102.878	4868.89	190.937	77.55	4855.49	213.116	77.5951	5053.85	366.464	79.8874	1970.54	0.155677	1.47041
		0.157	333.15	4840.82	202.374	77.4164	4892.59	249.897	78.0582	7659.9	1581.96	102.878	4868.89	190.937	77.55	4855.49	213.116	77.5951	5053.85	366.464	79.8874	1970.54	0.154722	1.45093
		0.156	343.15	4840.82	202.374	77.4164	4892.59	249.897	78.0582	7659.9	1581.96	102.878	4868.89	190.937	77.55	4855.49	213.116	77.5951	5053.85	366.464	79.8874	1970.54	0.153767	1.43119
		0.155	353.15	4840.82	202.374	77.4164	4892.59	249.897	78.0582	7659.9	1581.96	102.878	4868.89	190.937	77.55	4855.49	213.116	77.5951	5053.85	366.464	79.8874	1970.54	0.152813	1.4112
[P4,4,4,4][Tau]	Gardas, R. L.; Ge, R.; Goodrich, P.; Hardacre, C.; Hussain, A.; Rooney, D. W. Thermophysical Properties of Amino Acid-Based Ionic Liquids. J. Chem. Eng. Data 2010, 55, 1505.	0.16	298.15	4840.82	202.649	77.4434	4892.59	249.518	78.0848	7659.9	2432.11	107.108	4868.89	191.306	77.5887	4855.49	216.344	77.6531	5053.85	382.727	80.0375	2019.12	0.157636	1.47747	7	1.69403	1.69403
		0.16	303.15	4840.82	202.649	77.4434	4892.59	249.518	78.0848	7659.9	2432.11	107.108	4868.89	191.306	77.5887	4855.49	216.344	77.6531	5053.85	382.727	80.0375	2019.12	0.157159	1.77555
		0.159	313.15	4840.82	202.649	77.4434	4892.59	249.518	78.0848	7659.9	2432.11	107.108	4868.89	191.306	77.5887	4855.49	216.344	77.6531	5053.85	382.727	80.0375	2019.12	0.156205	1.75768
		0.158	323.15	4840.82	202.649	77.4434	4892.59	249.518	78.0848	7659.9	2432.11	107.108	4868.89	191.306	77.5887	4855.49	216.344	77.6531	5053.85	382.727	80.0375	2019.12	0.155251	1.73959
		0.157	333.15	4840.82	202.649	77.4434	4892.59	249.518	78.0848	7659.9	2432.11	107.108	4868.89	191.306	77.5887	4855.49	216.344	77.6531	5053.85	382.727	80.0375	2019.12	0.154298	1.72127
		0.156	343.15	4840.82	202.649	77.4434	4892.59	249.518	78.0848	7659.9	2432.11	107.108	4868.89	191.306	77.5887	4855.49	216.344	77.6531	5053.85	382.727	80.0375	2019.12	0.153344	1.70272
		0.155	353.15	4840.82	202.649	77.4434	4892.59	249.518	78.0848	7659.9	2432.11	107.108	4868.89	191.306	77.5887	4855.49	216.344	77.6531	5053.85	382.727	80.0375	2019.12	0.15239	1.68393
[P4,4,4,4][Lys]	Gardas, R. L.; Ge, R.; Goodrich, P.; Hardacre, C.; Hussain, A.; Rooney, D. W. Thermophysical Properties of Amino Acid-Based Ionic Liquids. J. Chem. Eng. Data 2010, 55, 1505.	0.163	298.15	4840.82	908.61	83.3625	4892.59	962.631	84	7659.9	2643.91	109.101	4868.89	898.772	83.5165	4855.49	921.417	83.5404	5053.85	1097.47	85.8196	2229.65	0.157522	3.36043	7	3.59227	3.59227
		0.163	303.15	4840.82	908.61	83.3625	4892.59	962.631	84	7659.9	2643.91	109.101	4868.89	898.772	83.5165	4855.49	921.417	83.5404	5053.85	1097.47	85.8196	2229.65	0.157047	3.65188
		0.162	313.15	4840.82	908.61	83.3625	4892.59	962.631	84	7659.9	2643.91	109.101	4868.89	898.772	83.5165	4855.49	921.417	83.5404	5053.85	1097.47	85.8196	2229.65	0.156097	3.64363
		0.161	323.15	4840.82	908.61	83.3625	4892.59	962.631	84	7659.9	2643.91	109.101	4868.89	898.772	83.5165	4855.49	921.417	83.5404	5053.85	1097.47	85.8196	2229.65	0.155147	3.63528
		0.16	333.15	4840.82	908.61	83.3625	4892.59	962.631	84	7659.9	2643.91	109.101	4868.89	898.772	83.5165	4855.49	921.417	83.5404	5053.85	1097.47	85.8196	2229.65	0.154197	3.62683
		0.159	343.15	4840.82	908.61	83.3625	4892.59	962.631	84	7659.9	2643.91	109.101	4868.89	898.772	83.5165	4855.49	921.417	83.5404	5053.85	1097.47	85.8196	2229.65	0.153247	3.61827
		0.158	353.15	4840.82	908.61	83.3625	4892.59	962.631	84	7659.9	2643.91	109.101	4868.89	898.772	83.5165	4855.49	921.417	83.5404	5053.85	1097.47	85.8196	2229.65	0.152297	3.6096
[P4,4,4,4][Thr]	Gardas, R. L.; Ge, R.; Goodrich, P.; Hardacre, C.; Hussain, A.; Rooney, D. W. Thermophysical Properties of Amino Acid-Based Ionic Liquids. J. Chem. Eng. Data 2010, 55, 1505.	0.156	298.15	4840.82	302.156	78.1955	4892.59	352.483	78.8517	7659.9	1820.55	104.145	4868.89	291.004	78.3454	4855.49	313.63	78.3773	5053.85	477.559	80.7217	2012.64	0.156785	0.502999	7	0.681667	0.681667
		0.155	303.15	4840.82	302.156	78.1955	4892.59	352.483	78.8517	7659.9	1820.55	104.145	4868.89	291.004	78.3454	4855.49	313.63	78.3773	5053.85	477.559	80.7217	2012.64	0.156308	0.843677
		0.154	313.15	4840.82	302.156	78.1955	4892.59	352.483	78.8517	7659.9	1820.55	104.145	4868.89	291.004	78.3454	4855.49	313.63	78.3773	5053.85	477.559	80.7217	2012.64	0.155354	0.879054
		0.153	323.15	4840.82	302.156	78.1955	4892.59	352.483	78.8517	7659.9	1820.55	104.145	4868.89	291.004	78.3454	4855.49	313.63	78.3773	5053.85	477.559	80.7217	2012.64	0.1544	0.914893
		0.152	333.15	4840.82	302.156	78.1955	4892.59	352.483	78.8517	7659.9	1820.55	104.145	4868.89	291.004	78.3454	4855.49	313.63	78.3773	5053.85	477.559	80.7217	2012.64	0.153446	0.951204
		0.152	343.15	4840.82	302.156	78.1955	4892.59	352.483	78.8517	7659.9	1820.55	104.145	4868.89	291.004	78.3454	4855.49	313.63	78.3773	5053.85	477.559	80.7217	2012.64	0.152492	0.323601
		0.151	353.15	4840.82	302.156	78.1955	4892.59	352.483	78.8517	7659.9	1820.55	104.145	4868.89	291.004	78.3454	4855.49	313.63	78.3773	5053.85	477.559	80.7217	2012.64	0.151538	0.356237
[P4,4,4,4][Pro]	Gardas, R. L.; Ge, R.; Goodrich, P.; Hardacre, C.; Hussain, A.; Rooney, D. W. Thermophysical Properties of Amino Acid-Based Ionic Liquids. J. Chem. Eng. Data 2010, 55, 1505.	0.154	298.15	4840.82	274.927	78.0373	4892.59	318.299	78.6528	7659.9	1680.22	103.482	4868.89	261.498	78.1665	4855.49	284.99	78.2113	5053.85	428.649	80.4363	1995.4	0.16188	5.11691	7	5.58295	5.58295
		0.153	303.15	4840.82	274.927	78.0373	4892.59	318.299	78.6528	7659.9	1680.22	103.482	4868.89	261.498	78.1665	4855.49	284.99	78.2113	5053.85	428.649	80.4363	1995.4	0.161403	5.4921
		0.152	313.15	4840.82	274.927	78.0373	4892.59	318.299	78.6528	7659.9	1680.22	103.482	4868.89	261.498	78.1665	4855.49	284.99	78.2113	5053.85	428.649	80.4363	1995.4	0.160449	5.55832
		0.151	323.15	4840.82	274.927	78.0373	4892.59	318.299	78.6528	7659.9	1680.22	103.482	4868.89	261.498	78.1665	4855.49	284.99	78.2113	5053.85	428.649	80.4363	1995.4	0.159494	5.62543
		0.15	333.15	4840.82	274.927	78.0373	4892.59	318.299	78.6528	7659.9	1680.22	103.482	4868.89	261.498	78.1665	4855.49	284.99	78.2113	5053.85	428.649	80.4363	1995.4	0.15854	5.69342
		0.149	343.15	4840.82	274.927	78.0373	4892.59	318.299	78.6528	7659.9	1680.22	103.482	4868.89	261.498	78.1665	4855.49	284.99	78.2113	5053.85	428.649	80.4363	1995.4	0.157586	5.76233
		0.148	353.15	4840.82	274.927	78.0373	4892.59	318.299	78.6528	7659.9	1680.22	103.482	4868.89	261.498	78.1665	4855.49	284.99	78.2113	5053.85	428.649	80.4363	1995.4	0.156632	5.83217
[P4,4,4,4][Val]	Gardas, R. L.; Ge, R.; Goodrich, P.; Hardacre, C.; Hussain, A.; Rooney, D. W. Thermophysical Properties of Amino Acid-Based Ionic Liquids. J. Chem. Eng. Data 2010, 55, 1505.	0.157	313.15	4840.82	303.597	78.2037	4892.59	346.745	78.8179	7659.9	1707.11	103.607	4868.89	296.591	78.3964	4855.49	313.63	78.3773	5053.85	456.551	80.5978	2005.21	0.157952	0.606206	5	0.673708	0.673708
		0.156	323.15	4840.82	303.597	78.2037	4892.59	346.745	78.8179	7659.9	1707.11	103.607	4868.89	296.591	78.3964	4855.49	313.63	78.3773	5053.85	456.551	80.5978	2005.21	0.156998	0.639523
		0.155	333.15	4840.82	303.597	78.2037	4892.59	346.745	78.8179	7659.9	1707.11	103.607	4868.89	296.591	78.3964	4855.49	313.63	78.3773	5053.85	456.551	80.5978	2005.21	0.156044	0.67327
		0.154	343.15	4840.82	303.597	78.2037	4892.59	346.745	78.8179	7659.9	1707.11	103.607	4868.89	296.591	78.3964	4855.49	313.63	78.3773	5053.85	456.551	80.5978	2005.21	0.155089	0.707455
		0.153	353.15	4840.82	303.597	78.2037	4892.59	346.745	78.8179	7659.9	1707.11	103.607	4868.89	296.591	78.3964	4855.49	313.63	78.3773	5053.85	456.551	80.5978	2005.21	0.154135	0.742086
[P4,4,4,4][Cys]	Gardas, R. L.; Ge, R.; Goodrich, P.; Hardacre, C.; Hussain, A.; Rooney, D. W. Thermophysical Properties of Amino Acid-Based Ionic Liquids. J. Chem. Eng. Data 2010, 55, 1505.	0.152	298.15	4840.82	204.091	77.4259	4892.59	243.957	78.0251	7659.9	2342.92	106.567	4868.89	190.937	77.55	4855.49	218.17	77.6273	5053.85	366.464	79.8874	2013.06	0.156576	3.01061	7	3.4407	3.4407
		0.151	303.15	4840.82	204.091	77.4259	4892.59	243.957	78.0251	7659.9	2342.92	106.567	4868.89	190.937	77.55	4855.49	218.17	77.6273	5053.85	366.464	79.8874	2013.06	0.156099	3.37693
		0.15	313.15	4840.82	204.091	77.4259	4892.59	243.957	78.0251	7659.9	2342.92	106.567	4868.89	190.937	77.55	4855.49	218.17	77.6273	5053.85	366.464	79.8874	2013.06	0.155145	3.43014
		0.149	323.15	4840.82	204.091	77.4259	4892.59	243.957	78.0251	7659.9	2342.92	106.567	4868.89	190.937	77.55	4855.49	218.17	77.6273	5053.85	366.464	79.8874	2013.06	0.154191	3.48407
		0.148	333.15	4840.82	204.091	77.4259	4892.59	243.957	78.0251	7659.9	2342.92	106.567	4868.89	190.937	77.55	4855.49	218.17	77.6273	5053.85	366.464	79.8874	2013.06	0.153237	3.53872
		0.147	343.15	4840.82	204.091	77.4259	4892.59	243.957	78.0251	7659.9	2342.92	106.567	4868.89	190.937	77.55	4855.49	218.17	77.6273	5053.85	366.464	79.8874	2013.06	0.152283	3.59412
		0.146	353.15	4840.82	204.091	77.4259	4892.59	243.957	78.0251	7659.9	2342.92	106.567	4868.89	190.937	77.55	4855.49	218.17	77.6273	5053.85	366.464	79.8874	2013.06	0.151329	3.65028
[C4mim][NPf2]	Liu, H.; Maginn, E.; Visser, A. E.; Bridges, N. J.; Fox, E. B. Thermal and Transport Properties of Six Ionic Liquids: An Experimental and Molecular Dynamics Study. Ind. Eng. Chem. Res. 2012, 51, 7242.	0.110964	296.141	783.9	6658.66	96.4497	821.761	6866.13	97.718	2278.84	13684.8	135.036	785.231	6613.98	96.2497	793.069	6701.95	96.7368	924.65	7395.25	100.98	3051.74	0.122606	10.4912	3	5.24982	5.24982
		0.115515	314.346	783.9	6658.66	96.4497	821.761	6866.13	97.718	2278.84	13684.8	135.036	785.231	6613.98	96.2497	793.069	6701.95	96.7368	924.65	7395.25	100.98	3051.74	0.120902	4.66365
		0.118512	332.359	783.9	6658.66	96.4497	821.761	6866.13	97.718	2278.84	13684.8	135.036	785.231	6613.98	96.2497	793.069	6701.95	96.7368	924.65	7395.25	100.98	3051.74	0.119217	0.594606
[N4,1,1,1][ NTf2]	Liu, H.; Maginn, E.; Visser, A. E.; Bridges, N. J.; Fox, E. B. Thermal and Transport Properties of Six Ionic Liquids: An Experimental and Molecular Dynamics Study. Ind. Eng. Chem. Res. 2012, 51, 7242.	0.124712	296.692	363.411	2198.94	56.5799	391.681	2344.38	58.0921	1533.99	7682.48	100.398	383.441	2167.13	56.4801	370.145	2231.79	56.9561	471.126	2727.4	62.0161	1292.02	0.128181	2.78161	3	3.75261	3.75261
		0.123224	312.717	363.411	2198.94	56.5799	391.681	2344.38	58.0921	1533.99	7682.48	100.398	383.441	2167.13	56.4801	370.145	2231.79	56.9561	471.126	2727.4	62.0161	1292.02	0.126632	2.76557
		0.118008	332.209	363.411	2198.94	56.5799	391.681	2344.38	58.0921	1533.99	7682.48	100.398	383.441	2167.13	56.4801	370.145	2231.79	56.9561	471.126	2727.4	62.0161	1292.02	0.124747	5.71066
[N4COOH,1,1,1][ NTf2]	Liu, H.; Maginn, E.; Visser, A. E.; Bridges, N. J.; Fox, E. B. Thermal and Transport Properties of Six Ionic Liquids: An Experimental and Molecular Dynamics Study. Ind. Eng. Chem. Res. 2012, 51, 7242.	0.134992	295.698	849.224	2198.94	62.1707	898.686	2344.38	63.7053	2528.65	7682.48	106.074	847.555	2167.13	61.9839	860.773	2231.79	62.546	1026.37	2727.4	67.6609	1488.2	0.130381	3.4162	3	7.58206	7.58206
		0.141646	313.112	849.224	2198.94	62.1707	898.686	2344.38	63.7053	2528.65	7682.48	106.074	847.555	2167.13	61.9839	860.773	2231.79	62.546	1026.37	2727.4	67.6609	1488.2	0.128703	9.13751
		0.141389	331.026	849.224	2198.94	62.1707	898.686	2344.38	63.7053	2528.65	7682.48	106.074	847.555	2167.13	61.9839	860.773	2231.79	62.546	1026.37	2727.4	67.6609	1488.2	0.126978	10.1925
[C4mmim][ NTf2]	Liu, H.; Maginn, E.; Visser, A. E.; Bridges, N. J.; Fox, E. B. Thermal and Transport Properties of Six Ionic Liquids: An Experimental and Molecular Dynamics Study. Ind. Eng. Chem. Res. 2012, 51, 7242.	0.126036	296.176	997.581	2198.94	63.372	1038.34	2344.38	64.8301	2627.66	7682.48	106.632	996.316	2167.13	63.1585	1007.42	2231.79	63.7338	1149.91	2727.4	68.6222	1533.32	0.122193	3.04909	3	4.91286	4.91286
		0.126276	313.352	997.581	2198.94	63.372	1038.34	2344.38	64.8301	2627.66	7682.48	106.632	996.316	2167.13	63.1585	1007.42	2231.79	63.7338	1149.91	2727.4	68.6222	1533.32	0.12054	4.54245
		0.127766	333.159	997.581	2198.94	63.372	1038.34	2344.38	64.8301	2627.66	7682.48	106.632	996.316	2167.13	63.1585	1007.42	2231.79	63.7338	1149.91	2727.4	68.6222	1533.32	0.118634	7.14704
[C4py][BF4]	Tomida, D.; Kenmochi, S.; Qiao, K.; Tsukada, T.; Yokoyama, C. Densities and Thermal Conductivities of N-alkylpyridinium Tetrafluoroborates at High Pressure. Fluid Phase Equilibr. 2013, 340, 31.	0.171	294.2	790.337	51.8634	33.4912	824.854	111.107	34.8896	2234.82	1604.48	64.3218	781.201	43.6333	33.2866	798.535	63.241	33.7935	922.336	248.388	38.1576	484.041	0.16568	3.1109	3	3.70121	3.70121
		0.17	314.3	790.337	51.8634	33.4912	824.854	111.107	34.8896	2234.82	1604.48	64.3218	781.201	43.6333	33.2866	798.535	63.241	33.7935	922.336	248.388	38.1576	484.041	0.163709	3.70082
		0.169	334.3	790.337	51.8634	33.4912	824.854	111.107	34.8896	2234.82	1604.48	64.3218	781.201	43.6333	33.2866	798.535	63.241	33.7935	922.336	248.388	38.1576	484.041	0.161747	4.29192
[C6py][BF4]	Tomida, D.; Kenmochi, S.; Qiao, K.; Tsukada, T.; Yokoyama, C. Densities and Thermal Conductivities of N-alkylpyridinium Tetrafluoroborates at High Pressure. Fluid Phase Equilibr. 2013, 340, 31.	0.163	294.2	1787.47	51.8634	50.0214	1828.3	111.107	51.0323	3500.86	1604.48	76.1563	1778.86	43.6333	49.8999	1797.15	63.241	50.2394	1943.85	248.388	53.4977	838.336	0.162167	0.510908	3	1.30883	1.30883
		0.163	314.3	1787.47	51.8634	50.0214	1828.3	111.107	51.0323	3500.86	1604.48	76.1563	1778.86	43.6333	49.8999	1797.15	63.241	50.2394	1943.85	248.388	53.4977	838.336	0.160208	1.71285
		0.161	334.3	1787.47	51.8634	50.0214	1828.3	111.107	51.0323	3500.86	1604.48	76.1563	1778.86	43.6333	49.8999	1797.15	63.241	50.2394	1943.85	248.388	53.4977	838.336	0.158259	1.70272
[C8py][BF4]	Tomida, D.; Kenmochi, S.; Qiao, K.; Tsukada, T.; Yokoyama, C. Densities and Thermal Conductivities of N-alkylpyridinium Tetrafluoroborates at High Pressure. Fluid Phase Equilibr. 2013, 340, 31.	0.16	294.2	3536.84	51.8634	70.3038	3584.1	111.107	71.0725	5519.42	1604.48	92.3161	3528.76	43.6333	70.2282	3548.03	63.241	70.4699	3718.04	248.388	72.9932	1444.74	0.1647	2.9374	3	2.15253	2.15253
		0.16	314.3	3536.84	51.8634	70.3038	3584.1	111.107	71.0725	5519.42	1604.48	92.3161	3528.76	43.6333	70.2282	3548.03	63.241	70.4699	3718.04	248.388	72.9932	1444.74	0.162762	1.72638
		0.158	334.3	3536.84	51.8634	70.3038	3584.1	111.107	71.0725	5519.42	1604.48	92.3161	3528.76	43.6333	70.2282	3548.03	63.241	70.4699	3718.04	248.388	72.9932	1444.74	0.160834	1.79381
	green means testing set																						total	2.26493	359
																							max AAD	10.4912
																							training set	2.13527	299
																							test set	2.91104	60

## Sheet: Table S6
	c0	c1	c2	c3	c4	c5	c6	c7	c8	c9	c10	c11	c12	c13	c14	c15	c16	c17	c18	d0	d1
values of parameters	0.325884	-0.011321	0.00230768	-0.278169	-0.0217071	0.00134735	-0.0483165	-0.000213036	4.93029e-05	-0.00854528	-0.000180308	-0.000774005	0.0330908	0.0270421	-0.00222058	0.272529	0.00637864	-0.000707589	0.0288991	9.89528e-05	-1.76742e-09
ionic liquids		topological indexes																		INPUT	OUTPUT
cation	antion	eca-max,r	ean-max,r	eca-an,r	eca-max,e	ean-max,e	eca-an,e	eca-max,w	ean-max,w	eca-an,w	eca-max,h	ean-max,h	eca-an,h	eca-max,s	ean-max,s	eca-an,s	eca-max,o	ean-max,o	eca-an,o	T/ K	λcalc/ W m-1 K-1
C1mim	NTf2	165.509	2198.94	54.1576	194.446	2344.38	55.7399	1253.7	7682.48	98.6078	160.337	2167.13	53.8424	172.554	2231.79	54.5527	271.541	2727.4	59.7913		0.158477
C1mim	OTf	165.509	239.692	22.3766	194.446	318.974	24.6815	1253.7	3218	67.8195	160.337	223.122	21.9773	172.554	257.468	22.9565	271.541	528.183	29.9833		0.21054
C1mim	EtSO4	165.509	202.828	21.7357	194.446	250.52	23.4945	1253.7	2489.89	62.3596	160.337	190.879	21.6333	172.554	216.344	22.2486	271.541	390.159	27.8568		0.227785
C1mim	OcSO4	165.509	2902.8	65.0529	194.446	2969.82	65.8104	1253.7	5869.92	92.1638	160.337	2889.07	65.0538	172.554	2921.75	65.261	271.541	3160.72	67.9117		0.200332
C1mim	FAP	165.509	7710.19	94.6919	194.446	7982.73	96.2805	1253.7	15722	135.375	160.337	7658.76	94.3981	172.554	7758.54	94.9895	271.541	8641.58	100.115		0.141129
C1mim	Phosph	165.509	7322.91	98.4788	194.446	7392.66	99.0025	1253.7	10643.6	120.461	160.337	7333.31	98.6357	172.554	7342.23	98.6256	271.541	7597.83	100.504		0.201837
C1mim	Cl	165.509	3.4225	14.6329	194.446	9.9856	15.8424	1253.7	1256.7	50.601	160.337	1	14.5602	172.554	9	15.0665	271.541	49	19.2094		0.236234
C1mim	BF4	165.509	51.8634	16.5816	194.446	111.107	19.0924	1253.7	1604.48	54.0427	160.337	43.6333	16.3401	172.554	63.241	17.1464	271.541	248.388	24.1039		0.245559
C1mim	PF6	165.509	125.135	18.9009	194.446	211.514	21.7448	1253.7	3223.46	67.5344	160.337	111.678	18.5203	172.554	142.086	19.5704	271.541	430.419	27.7669		0.223193
C1mim	CH3COO	165.509	31.523	15.8461	194.446	57.9959	17.5405	1253.7	821.689	46.1978	160.337	25.3247	15.8114	172.554	37.3303	16.2481	271.541	125.15	21.3073		0.250843
C1mim	DCA	165.509	81.3496	17.9981	194.446	108.877	19.5378	1253.7	944.679	47.7607	160.337	68.6945	17.6352	172.554	88.2503	18.3848	271.541	1.74788	17.9463		0.218202
C1mim	C(CN)3	165.509	222.768	22.2353	194.446	257.604	23.6375	1253.7	1367.68	52.2835	160.337	204.403	21.7945	172.554	231.512	22.5832	271.541	342.682	26.8887		0.226228
C1mim	Ser	165.509	202.374	21.646	194.446	249.897	23.3505	1253.7	1581.96	54.2288	160.337	190.937	21.4709	172.554	213.116	22.0454	271.541	366.464	27.2213		0.227308
C1mim	Tau	165.509	202.649	21.7424	194.446	249.518	23.4393	1253.7	2432.11	61.879	160.337	191.306	21.6102	172.554	216.344	22.2486	271.541	382.727	27.6586		0.226529
C1mim	Lys	165.509	908.61	37.7433	194.446	962.631	38.835	1253.7	2643.91	65.2668	160.337	898.772	37.7094	172.554	921.417	38	271.541	1097.47	41.5211		0.210202
C1mim	Thr	165.509	302.156	24.2856	194.446	352.483	25.8795	1253.7	1820.55	56.5951	160.337	291.004	24.1868	172.554	313.63	24.6577	271.541	477.559	29.5804		0.221593
C1mim	Pro	165.509	274.927	23.7712	194.446	318.299	25.2669	1253.7	1680.22	55.3646	160.337	261.498	23.6008	172.554	284.99	24.1247	271.541	428.649	28.7924		0.222607
C1mim	Val	165.509	303.597	24.3119	194.446	346.745	25.7763	1253.7	1707.11	55.5989	160.337	296.591	24.3516	172.554	313.63	24.6577	271.541	456.551	29.2404		0.223935
C1mim	NPf2	165.509	6658.66	92.0153	194.446	6866.13	93.2915	1253.7	13684.8	130.292	160.337	6613.98	91.7551	172.554	6701.95	92.3038	271.541	7395.25	96.5557		0.156594
C1mim	MeOHPO2	165.509	55.565	16.7162	194.446	90.1336	18.5417	1253.7	1904.8	56.8431	160.337	47.9123	16.6433	172.554	66.7219	17.2916	271.541	191.421	22.9129		0.25035
C1mim	Cys	165.509	204.091	21.6798	194.446	243.957	23.2394	1253.7	2342.92	60.9364	160.337	190.937	21.4709	172.554	218.17	22.1585	271.541	366.464	27.2213		0.219049
C1mim	MeSO4	165.509	107.281	18.5796	194.446	152.556	20.5302	1253.7	2269.5	60.1705	160.337	95.9101	18.4391	172.554	120.152	19.1572	271.541	285.017	25.219		0.241395
C1mim	DMP	165.509	187.969	21.0863	194.446	233.047	22.8502	1253.7	2405.3	61.5742	160.337	178.846	21.095	172.554	201.033	21.6102	271.541	363.453	27.1477		0.234214
C1mim	NO3	165.509	29.486	15.7743	194.446	66.1359	17.769	1253.7	985.608	47.9379	160.337	21.583	15.5242	172.554	37.3303	16.2481	271.541	154.43	21.9773		0.251284
C1mim	NO2	165.509	13.5392	15.1285	194.446	40.3355	16.9087	1253.7	715.704	44.9893	160.337	7.4641	14.9332	172.554	19.3808	15.5563	271.541	104.445	20.7123		0.254374
C1mim	SCN	165.509	16.2447	15.2188	194.446	29.805	16.5951	1253.7	1375.96	51.8147	160.337	7.4641	14.9332	172.554	24.3725	15.7162	271.541	84.4425	20.2237		0.243196
C1mim	BrO3	165.509	30.5918	15.8235	194.446	65.6901	17.7555	1253.7	7161.03	92.1182	160.337	21.583	15.5242	172.554	46.6333	16.6132	271.541	177.558	22.5167		0.245237
C1mim	IO3	165.509	31.1467	15.8494	194.446	64.1033	17.708	1253.7	16878.2	134.927	160.337	21.583	15.5242	172.554	53.7951	16.8819	271.541	177.558	22.5167		0.41007
C1mim	HCO3	165.509	30.2022	15.8057	194.446	63.5545	17.6918	1253.7	933.767	47.392	160.337	21.8876	15.5563	172.554	37.3303	16.2481	271.541	145.581	21.7715		0.247725
C2mim	NTf2	289.862	2198.94	55.6443	321.575	2344.38	57.2139	1514.46	7682.48	100.139	285.602	2167.13	55.3444	297.563	2231.79	56.0357	407.03	2727.4	61.2454		0.155697
C2mim	OTf	289.862	239.692	25.7672	321.575	318.974	27.851	1514.46	3218	70.0266	285.602	223.122	25.4362	297.563	257.468	26.2869	407.03	528.183	32.7872		0.197668
C2mim	EtSO4	289.862	202.828	25.2127	321.575	250.52	26.8047	1514.46	2489.89	64.7531	285.602	190.879	25.1396	297.563	216.344	25.671	407.03	390.159	30.8545		0.214751
C2mim	OcSO4	289.862	2902.8	66.2957	321.575	2969.82	67.0635	1514.46	5869.92	93.7998	285.602	2889.07	66.3023	297.563	2921.75	66.5056	407.03	3160.72	69.1954		0.196897
C2mim	FAP	289.862	7710.19	95.55	321.575	7982.73	97.1413	1514.46	15722	136.494	285.602	7658.76	95.2628	297.563	7758.54	95.8488	407.03	8641.58	100.99		0.138585
C2mim	Phosph	289.862	7322.91	99.3041	321.575	7392.66	99.8399	1514.46	10643.6	121.717	285.602	7333.31	99.4636	297.563	7342.23	99.4535	407.03	7597.83	101.376		0.198479
C2mim	Cl	289.862	3.4225	19.4258	321.575	9.9856	20.4324	1514.46	1256.7	53.5229	285.602	1	19.3907	297.563	9	19.7737	407.03	49	23.3452		0.217665
C2mim	BF4	289.862	51.8634	20.933	321.575	111.107	23.0439	1514.46	1604.48	56.7878	285.602	43.6333	20.7605	297.563	63.241	21.4009	407.03	248.388	27.5136		0.224242
C2mim	PF6	289.862	125.135	22.8141	321.575	211.514	25.2851	1514.46	3223.46	69.7506	285.602	111.678	22.5167	297.563	142.086	23.388	407.03	430.419	30.7734		0.203403
C2mim	CH3COO	289.862	31.523	20.3553	321.575	57.9959	21.7755	1514.46	821.689	49.381	285.602	25.3247	20.347	297.563	37.3303	20.6882	407.03	125.15	25.0998		0.233631
C2mim	DCA	289.862	81.3496	22.0719	321.575	108.877	23.4143	1514.46	944.679	50.8461	285.602	68.6945	21.7945	297.563	88.2503	22.4054	407.03	1.74788	22.3175		0.230188
C2mim	C(CN)3	289.862	222.768	25.6447	321.575	257.604	26.9302	1514.46	1367.68	55.1163	285.602	204.403	25.2784	297.563	231.512	25.9615	407.03	342.682	29.9833		0.219159
C2mim	Ser	289.862	202.374	25.1354	321.575	249.897	26.6786	1514.46	1581.96	56.9649	285.602	190.937	25	297.563	213.116	25.4951	407.03	366.464	30.282		0.217041
C2mim	Tau	289.862	202.649	25.2185	321.575	249.518	26.7563	1514.46	2432.11	64.2903	285.602	191.306	25.1197	297.563	216.344	25.671	407.03	382.727	30.6757		0.213935
C2mim	Lys	289.862	908.61	39.8472	321.575	962.631	40.9227	1514.46	2643.91	67.5574	285.602	898.772	39.8246	297.563	921.417	40.0999	407.03	1097.47	43.589		0.205756
C2mim	Thr	289.862	302.156	27.4414	321.575	352.483	28.918	1514.46	1820.55	59.222	285.602	291.004	27.3679	297.563	313.63	27.7849	407.03	477.559	32.4191		0.213244
C2mim	Pro	289.862	274.927	26.9872	321.575	318.299	28.3711	1514.46	1680.22	58.0472	285.602	261.498	26.8514	297.563	284.99	27.313	407.03	428.649	31.7017		0.214849
C2mim	Val	289.862	303.597	27.4647	321.575	346.745	28.8257	1514.46	1707.11	58.2708	285.602	296.591	27.5136	297.563	313.63	27.7849	407.03	456.551	32.1092		0.215757
C2mim	NPf2	289.862	6658.66	92.8981	321.575	6866.13	94.1796	1514.46	13684.8	131.454	285.602	6613.98	92.6445	297.563	6701.95	93.188	407.03	7395.25	97.4628		0.153973
C2mim	MeOHPO2	289.862	55.565	21.0397	321.575	90.1336	22.5898	1514.46	1904.8	59.4591	285.602	47.9123	21	297.563	66.7219	21.5174	407.03	191.421	26.4764		0.227726
C2mim	Cys	289.862	204.091	25.1645	321.575	243.957	26.5814	1514.46	2342.92	63.3836	285.602	190.937	25	297.563	218.17	25.593	407.03	366.464	30.282		0.207726
C2mim	MeSO4	289.862	107.281	22.5487	321.575	152.556	24.2485	1514.46	2269.5	62.6476	285.602	95.9101	22.4499	297.563	120.152	23.0434	407.03	285.017	28.4956		0.22221
C2mim	DMP	289.862	187.969	24.655	321.575	233.047	26.2418	1514.46	2405.3	63.997	285.602	178.846	24.6779	297.563	201.033	25.1197	407.03	363.453	30.2159		0.219786
C2mim	NO3	289.862	29.486	20.2995	321.575	66.1359	21.96	1514.46	985.608	51.0126	285.602	21.583	20.1246	297.563	37.3303	20.6882	407.03	154.43	25.671		0.231979
C2mim	NO2	289.862	13.5392	19.8018	321.575	40.3355	21.2699	1514.46	715.704	48.2523	285.602	7.4641	19.6723	297.563	19.3808	20.1494	407.03	104.445	24.5967		0.235825
C2mim	SCN	289.862	16.2447	19.8709	321.575	29.805	21.0214	1514.46	1375.96	54.6718	285.602	7.4641	19.6723	297.563	24.3725	20.2731	407.03	84.4425	24.1868		0.223283
C2mim	BrO3	289.862	30.5918	20.3377	321.575	65.6901	21.949	1514.46	7161.03	93.7551	285.602	21.583	20.1246	297.563	46.6333	20.9762	407.03	177.558	26.1343		0.217909
C2mim	IO3	289.862	31.1467	20.3579	321.575	64.1033	21.9106	1514.46	16878.2	136.05	285.602	21.583	20.1246	297.563	53.7951	21.1896	407.03	177.558	26.1343		0.373233
C2mim	HCO3	289.862	30.2022	20.3239	321.575	63.5545	21.8975	1514.46	933.767	50.4999	285.602	21.8876	20.1494	297.563	37.3303	20.6882	407.03	145.581	25.4951		0.229982
C3mim	NTf2	488.135	2198.94	57.9959	522.851	2344.38	59.531	1848.18	7682.48	102.157	484.397	2167.13	57.7148	496.553	2231.79	58.3781	616.892	2727.4	63.4902		0.153086
C3mim	OTf	488.135	239.692	30.5154	522.851	318.974	32.3447	1848.18	3218	72.8832	484.397	223.122	30.249	496.553	257.468	30.9677	616.892	528.183	36.8103		0.185591
C3mim	EtSO4	488.135	202.828	30.0487	522.851	250.52	31.4483	1848.18	2489.89	67.8322	484.397	190.879	30	496.553	216.344	30.4467	616.892	390.159	35.0999		0.202967
C3mim	OcSO4	488.135	2902.8	68.2815	522.851	2969.82	69.0508	1848.18	5869.92	95.9513	484.397	2889.07	68.2935	496.553	2921.75	68.4909	616.892	3160.72	71.1899		0.193734
C3mim	FAP	488.135	7710.19	96.9383	522.851	7982.73	98.5238	1848.18	15722	137.981	484.397	7658.76	96.6592	496.553	7758.54	97.2368	616.892	8641.58	102.367		0.136209
C3mim	Phosph	488.135	7322.91	100.641	522.851	7392.66	101.185	1848.18	10643.6	123.382	484.397	7333.31	100.802	496.553	7342.23	100.792	616.892	7597.83	102.747		0.195163
C3mim	Cl	488.135	3.4225	25.389	522.851	9.9856	26.2295	1848.18	1256.7	57.2096	484.397	1	25.3772	496.553	9	25.671	616.892	49	28.7228		0.207031
C3mim	BF4	488.135	51.8634	26.5599	522.851	111.107	28.3112	1848.18	1604.48	60.2752	484.397	43.6333	26.4386	496.553	63.241	26.9444	616.892	248.388	32.2025		0.207911
C3mim	PF6	488.135	125.135	28.0664	522.851	211.514	30.1635	1848.18	3223.46	72.6181	484.397	111.678	27.8388	496.553	142.086	28.5482	616.892	430.419	35.0286		0.186607
C3mim	CH3COO	488.135	31.523	26.1071	522.851	57.9959	27.2887	1848.18	821.689	53.3547	484.397	25.3247	26.1151	496.553	37.3303	26.3818	616.892	125.15	30.1662		0.22137
C3mim	DCA	488.135	81.3496	27.4665	522.851	108.877	28.6135	1848.18	944.679	54.7134	484.397	68.6945	27.258	496.553	88.2503	27.7489	616.892	1.74788	27.8939		0.242593
C3mim	C(CN)3	488.135	222.768	30.412	522.851	257.604	31.5553	1848.18	1367.68	58.703	484.397	204.403	30.1164	496.553	231.512	30.692	616.892	342.682	34.3366		0.213078
C3mim	Ser	488.135	202.374	29.9838	522.851	249.897	31.3409	1848.18	1581.96	60.442	484.397	190.937	29.8831	496.553	213.116	30.2985	616.892	366.464	34.5977		0.207826
C3mim	Tau	488.135	202.649	30.0535	522.851	249.518	31.4071	1848.18	2432.11	67.3905	484.397	191.306	29.9833	496.553	216.344	30.4467	616.892	382.727	34.9428		0.202616
C3mim	Lys	488.135	908.61	43.0702	522.851	962.631	44.104	1848.18	2643.91	70.5141	484.397	898.772	43.0581	496.553	921.417	43.3128	616.892	1097.47	46.6905		0.201555
C3mim	Thr	488.135	302.156	31.9417	522.851	352.483	33.2679	1848.18	1820.55	62.5738	484.397	291.004	31.8904	496.553	313.63	32.249	616.892	477.559	36.4829		0.205356
C3mim	Pro	488.135	274.927	31.5523	522.851	318.299	32.7936	1848.18	1680.22	61.4632	484.397	261.498	31.4484	496.553	284.99	31.8434	616.892	428.649	35.8469		0.207727
C3mim	Val	488.135	303.597	31.9617	522.851	346.745	33.1877	1848.18	1707.11	61.6743	484.397	296.591	32.0156	496.553	313.63	32.249	616.892	456.551	36.2077		0.20808
C3mim	NPf2	488.135	6658.66	94.3255	522.851	6866.13	95.6049	1848.18	13684.8	132.998	484.397	6613.98	94.0798	496.553	6701.95	94.615	616.892	7395.25	98.8888		0.151532
C3mim	MeOHPO2	488.135	55.565	26.6441	522.851	90.1336	27.9428	1848.18	1904.8	62.7983	484.397	47.9123	26.6271	496.553	66.7219	27.037	616.892	191.421	31.3209		0.211089
C3mim	Cys	488.135	204.091	30.0082	522.851	243.957	31.2582	1848.18	2342.92	66.5261	484.397	190.937	29.8831	496.553	218.17	30.3809	616.892	366.464	34.5977		0.19776
C3mim	MeSO4	488.135	107.281	27.8511	522.851	152.556	29.3001	1848.18	2269.5	65.8253	484.397	95.9101	27.7849	496.553	120.152	28.2666	616.892	285.017	33.0454		0.206562
C3mim	DMP	488.135	187.969	29.5823	522.851	233.047	30.9699	1848.18	2405.3	67.1108	484.397	178.846	29.6142	496.553	201.033	29.9833	616.892	363.453	34.5398		0.206967
C3mim	NO3	488.135	29.486	26.0636	522.851	66.1359	27.4362	1848.18	985.608	54.8682	484.397	21.583	25.9422	496.553	37.3303	26.3818	616.892	154.43	30.6431		0.218002
C3mim	NO2	488.135	13.5392	25.6778	522.851	40.3355	26.887	1848.18	715.704	52.3118	484.397	7.4641	25.593	496.553	19.3808	25.9615	616.892	104.445	29.7489		0.223033
C3mim	SCN	488.135	16.2447	25.7312	522.851	29.805	26.6908	1848.18	1375.96	58.2859	484.397	7.4641	25.593	496.553	24.3725	26.0576	616.892	84.4425	29.4109		0.210722
C3mim	BrO3	488.135	30.5918	26.0933	522.851	65.6901	27.4274	1848.18	7161.03	95.9075	484.397	21.583	25.9422	496.553	46.6333	26.6083	616.892	177.558	31.0322		0.201808
C3mim	IO3	488.135	31.1467	26.1091	522.851	64.1033	27.3967	1848.18	16878.2	137.542	484.397	21.583	25.9422	496.553	53.7951	26.7769	616.892	177.558	31.0322		0.351414
C3mim	HCO3	488.135	30.2022	26.0826	522.851	63.5545	27.3862	1848.18	933.767	54.3919	484.397	21.8876	25.9615	496.553	37.3303	26.3818	616.892	145.581	30.4959		0.217233
C4mim	NTf2	783.9	2198.94	61.3903	821.761	2344.38	62.8684	2278.84	7682.48	104.796	785.231	2167.13	61.1882	793.069	2231.79	61.7576	924.65	2727.4	66.7008		0.1525
C4mim	OTf	783.9	239.692	36.5572	821.761	318.974	38.1403	2278.84	3218	76.5389	785.231	223.122	36.4417	793.069	257.468	36.9459	924.65	528.183	42.107		0.179597
C4mim	EtSO4	783.9	202.828	36.1685	821.761	250.52	37.3831	2278.84	2489.89	71.7457	785.231	190.879	36.2353	793.069	216.344	36.5103	924.65	390.159	40.6202		0.197482
C4mim	OcSO4	783.9	2902.8	71.1871	821.761	2969.82	71.948	2278.84	5869.92	98.7567	785.231	2889.07	71.2531	793.069	2921.75	71.3933	924.65	3160.72	74.0675		0.192305
C4mim	FAP	783.9	7710.19	99.0064	821.761	7982.73	100.576	2278.84	15722	139.947	785.231	7658.76	98.7725	793.069	7758.54	99.3026	924.65	8641.58	104.389		0.13501
C4mim	Phosph	783.9	7322.91	102.634	821.761	7392.66	103.184	2278.84	10643.6	125.577	785.231	7333.31	102.83	793.069	7342.23	102.786	924.65	7597.83	104.762		0.192819
C4mim	Cl	783.9	3.4225	32.4013	821.761	9.9856	33.1133	2278.84	1256.7	61.7995	785.231	1	32.5115	793.069	9	32.6343	924.65	49	35.2562		0.205914
C4mim	BF4	783.9	51.8634	33.3267	821.761	111.107	34.7854	2278.84	1604.48	64.6478	785.231	43.6333	33.3467	793.069	63.241	33.6452	924.65	248.388	38.1445		0.200594
C4mim	PF6	783.9	125.135	34.5393	821.761	211.514	36.309	2278.84	3223.46	76.2864	785.231	111.678	34.4674	793.069	142.086	34.9428	924.65	430.419	40.5586		0.178342
C4mim	CH3COO	783.9	31.523	32.967	821.761	57.9959	33.9584	2278.84	821.689	58.2491	785.231	25.3247	33.0908	793.069	37.3303	33.1964	924.65	125.15	36.4417		0.217132
C4mim	DCA	783.9	81.3496	34.0536	821.761	108.877	35.0319	2278.84	944.679	59.4962	785.231	68.6945	34	793.069	88.2503	34.2929	924.65	1.74788	34.5842		0.257836
C4mim	C(CN)3	783.9	222.768	36.4709	821.761	257.604	37.4732	2278.84	1367.68	63.1845	785.231	204.403	36.3318	793.069	231.512	36.7151	924.65	342.682	39.9625		0.211856
C4mim	Ser	783.9	202.374	36.1147	821.761	249.897	37.2928	2278.84	1581.96	64.8034	785.231	190.937	36.1386	793.069	213.116	36.3868	924.65	366.464	40.1871		0.204024
C4mim	Tau	783.9	202.649	36.1725	821.761	249.518	37.3485	2278.84	2432.11	71.3283	785.231	191.306	36.2215	793.069	216.344	36.5103	924.65	382.727	40.4846		0.197548
C4mim	Lys	783.9	908.61	47.5424	821.761	962.631	48.5146	2278.84	2643.91	74.2865	785.231	898.772	47.613	793.069	921.417	47.7703	924.65	1097.47	50.9706		0.200077
C4mim	Thr	783.9	302.156	37.7559	821.761	352.483	38.9263	2278.84	1820.55	66.7961	785.231	291.004	37.8153	793.069	313.63	38.0263	924.65	477.559	41.821		0.202029
C4mim	Pro	783.9	274.927	37.4271	821.761	318.299	38.5217	2278.84	1680.22	65.7568	785.231	261.498	37.4433	793.069	284.99	37.6829	924.65	428.649	41.2674		0.205244
C4mim	Val	783.9	303.597	37.7729	821.761	346.745	38.8577	2278.84	1707.11	65.9542	785.231	296.591	37.921	793.069	313.63	38.0263	924.65	456.551	41.5812		0.204928
C4mim	NPf2	783.9	6658.66	96.4497	821.761	6866.13	97.718	2278.84	13684.8	135.036	785.231	6613.98	96.2497	793.069	6701.95	96.7368	924.65	7395.25	100.98		0.150312
C4mim	MeOHPO2	783.9	55.565	33.3939	821.761	90.1336	34.4863	2278.84	1904.8	67.0064	785.231	47.9123	33.4963	793.069	66.7219	33.7194	924.65	191.421	37.4032		0.204332
C4mim	Cys	783.9	204.091	36.1349	821.761	243.957	37.2233	2278.84	2342.92	70.5122	785.231	190.937	36.1386	793.069	218.17	36.4555	924.65	366.464	40.1871		0.193928
C4mim	MeSO4	783.9	107.281	34.3646	821.761	152.556	35.5949	2278.84	2269.5	69.8513	785.231	95.9101	34.4238	793.069	120.152	34.7131	924.65	285.017	38.8587		0.199409
C4mim	DMP	783.9	187.969	35.782	821.761	233.047	36.9816	2278.84	2405.3	71.0641	785.231	178.846	35.9166	793.069	201.033	36.1248	924.65	363.453	40.1373		0.20088
C4mim	NO3	783.9	29.486	32.9325	821.761	66.1359	34.0771	2278.84	985.608	59.6386	785.231	21.583	32.9545	793.069	37.3303	33.1964	924.65	154.43	36.8375		0.212563
C4mim	NO2	783.9	13.5392	32.6281	821.761	40.3355	33.6365	2278.84	715.704	57.2954	785.231	7.4641	32.6803	793.069	19.3808	32.8634	924.65	104.445	36.0971		0.218617
C4mim	SCN	783.9	16.2447	32.6701	821.761	29.805	33.4799	2278.84	1375.96	62.7972	785.231	7.4641	32.6803	793.069	24.3725	32.9393	924.65	84.4425	35.819		0.207832
C4mim	BrO3	783.9	30.5918	32.9561	821.761	65.6901	34.07	2278.84	7161.03	98.7142	785.231	21.583	32.9545	793.069	46.6333	33.3766	924.65	177.558	37.1618		0.200328
C4mim	IO3	783.9	31.1467	32.9685	821.761	64.1033	34.0453	2278.84	16878.2	139.514	785.231	21.583	32.9545	793.069	53.7951	33.5112	924.65	177.558	37.1618		0.348415
C4mim	HCO3	783.9	30.2022	32.9475	821.761	63.5545	34.0368	2278.84	933.767	59.2007	785.231	21.8876	32.9697	793.069	37.3303	33.1964	924.65	145.581	36.7151		0.212678
C5mim	NTf2	1203.99	2198.94	65.9546	1245.07	2344.38	67.3568	2833.58	7682.48	108.187	1200.87	2167.13	65.7191	1213.92	2231.79	66.3023	1357	2727.4	71.0141		0.151068
C5mim	OTf	1203.99	239.692	43.7912	1245.07	318.974	45.1574	2833.58	3218	81.1199	1200.87	223.122	43.6234	1213.92	257.468	44.1248	1357	528.183	48.6518		0.17329
C5mim	EtSO4	1203.99	202.828	43.4673	1245.07	250.52	44.5197	2833.58	2489.89	76.6139	1200.87	190.879	43.4511	1213.92	216.344	43.7607	1357	390.159	47.3709		0.191511
C5mim	OcSO4	1203.99	2902.8	75.1588	1245.07	2969.82	75.9014	2833.58	5869.92	102.348	1200.87	2889.07	75.1798	1213.92	2921.75	75.3591	1357	3160.72	77.9744		0.190358
C5mim	FAP	1203.99	7710.19	101.9	1245.07	7982.73	103.441	2833.58	15722	142.504	1200.87	7658.76	101.642	1213.92	7758.54	102.191	1357	8641.58	107.196		0.134116
C5mim	Phosph	1203.99	7322.91	105.428	1245.07	7392.66	105.979	2833.58	10643.6	128.42	1200.87	7333.31	105.589	1213.92	7342.23	105.579	1357	7597.83	107.559		0.190674
C5mim	Cl	1203.99	3.4225	40.3867	1245.07	9.9856	40.9999	2833.58	1256.7	67.3901	1200.87	1	40.398	1213.92	9	40.5832	1357	49	42.8602		0.203729
C5mim	BF4	1203.99	51.8634	41.1328	1245.07	111.107	42.3619	2833.58	1604.48	70.0113	1200.87	43.6333	41.0731	1213.92	63.241	41.4005	1357	248.388	45.2659		0.19319
C5mim	PF6	1203.99	125.135	42.1213	1245.07	211.514	43.6216	2833.58	3223.46	80.8818	1200.87	111.678	41.9881	1213.92	142.086	42.4617	1357	430.419	47.3181		0.170918
C5mim	CH3COO	1203.99	31.523	40.8419	1245.07	57.9959	41.6855	2833.58	821.689	64.1498	1200.87	25.3247	40.8656	1213.92	37.3303	41.0366	1357	125.15	43.8406		0.211479
C5mim	DCA	1203.99	81.3496	41.724	1245.07	108.877	42.5645	2833.58	944.679	65.2843	1200.87	68.6945	41.6053	1213.92	88.2503	41.9285	1357	1.74788	42.3092		0.267524
C5mim	C(CN)3	1203.99	222.768	43.7192	1245.07	257.604	44.5953	2833.58	1367.68	68.6624	1200.87	204.403	43.5316	1213.92	231.512	43.9318	1357	342.682	46.8081		0.208412
C5mim	Ser	1203.99	202.374	43.4225	1245.07	249.897	44.4438	2833.58	1581.96	70.155	1200.87	190.937	43.3705	1213.92	213.116	43.6578	1357	366.464	47		0.198624
C5mim	Tau	1203.99	202.649	43.4706	1245.07	249.518	44.4906	2833.58	2432.11	76.2231	1200.87	191.306	43.4396	1213.92	216.344	43.7607	1357	382.727	47.2546		0.191903
C5mim	Lys	1203.99	908.61	53.3059	1245.07	962.631	54.2049	2833.58	2643.91	78.9982	1200.87	898.772	53.3104	1213.92	921.417	53.5164	1357	1097.47	56.4978		0.196784
C5mim	Thr	1203.99	302.156	44.7968	1245.07	352.483	45.8231	2833.58	1820.55	71.9997	1200.87	291.004	44.7772	1213.92	313.63	45.0333	1357	477.559	48.4045		0.196936
C5mim	Pro	1203.99	274.927	44.52	1245.07	318.299	45.48	2833.58	1680.22	71.0366	1200.87	261.498	44.4635	1213.92	284.99	44.7437	1357	428.649	47.927		0.200856
C5mim	Val	1203.99	303.597	44.811	1245.07	346.745	45.7649	2833.58	1707.11	71.2194	1200.87	296.591	44.8665	1213.92	313.63	45.0333	1357	456.551	48.1975		0.199956
C5mim	NPf2	1203.99	6658.66	99.4172	1245.07	6866.13	100.664	2833.58	13684.8	137.684	1200.87	6613.98	99.1917	1213.92	6701.95	99.6995	1357	7395.25	103.88		0.149348
C5mim	MeOHPO2	1203.99	55.565	41.1873	1245.07	90.1336	42.1166	2833.58	1904.8	72.1949	1200.87	47.9123	41.1947	1213.92	66.7219	41.4608	1357	191.421	44.643		0.198071
C5mim	Cys	1203.99	204.091	43.4393	1245.07	243.957	44.3856	2833.58	2342.92	75.46	1200.87	190.937	43.3705	1213.92	218.17	43.715	1357	366.464	47		0.189273
C5mim	MeSO4	1203.99	107.281	41.9781	1245.07	152.556	43.029	2833.58	2269.5	74.8428	1200.87	95.9101	41.9524	1213.92	120.152	42.2729	1357	285.017	45.8694		0.192601
C5mim	DMP	1203.99	187.969	43.1461	1245.07	233.047	44.183	2833.58	2405.3	75.9759	1200.87	178.846	43.1856	1213.92	201.033	43.4396	1357	363.453	46.9574		0.194515
C5mim	NO3	1203.99	29.486	40.8141	1245.07	66.1359	41.7822	2833.58	985.608	65.4141	1200.87	21.583	40.7554	1213.92	37.3303	41.0366	1357	154.43	44.1701		0.206136
C5mim	NO2	1203.99	13.5392	40.5688	1245.07	40.3355	41.4236	2833.58	715.704	63.2851	1200.87	7.4641	40.5339	1213.92	19.3808	40.7676	1357	104.445	43.5546		0.212754
C5mim	SCN	1203.99	16.2447	40.6026	1245.07	29.805	41.2966	2833.58	1375.96	68.3061	1200.87	7.4641	40.5339	1213.92	24.3725	40.8289	1357	84.4425	43.3244		0.204311
C5mim	BrO3	1203.99	30.5918	40.8331	1245.07	65.6901	41.7764	2833.58	7161.03	102.307	1200.87	21.583	40.7554	1213.92	46.6333	41.1825	1357	177.558	44.441		0.202861
C5mim	IO3	1203.99	31.1467	40.8431	1245.07	64.1033	41.7562	2833.58	16878.2	142.079	1200.87	21.583	40.7554	1213.92	53.7951	41.2916	1357	177.558	44.441		0.353249
C5mim	HCO3	1203.99	30.2022	40.8262	1245.07	63.5545	41.7494	2833.58	933.767	65.0151	1200.87	21.8876	40.7676	1213.92	37.3303	41.0366	1357	145.581	44.0681		0.20686
C6mim	NTf2	1778.31	2198.94	71.7583	1822.66	2344.38	73.0715	3542.57	7682.48	112.449	1775.46	2167.13	71.5472	1789.03	2231.79	72.0833	1943.77	2727.4	76.518		0.151912
C6mim	OTf	1778.31	239.692	52.124	1822.66	318.974	53.3075	3542.57	3218	86.7219	1775.46	223.122	51.9904	1789.03	257.468	52.4118	1943.77	528.183	56.3826		0.172831
C6mim	EtSO4	1778.31	202.828	51.8521	1822.66	250.52	52.7684	3542.57	2489.89	82.5223	1775.46	190.879	51.8459	1789.03	216.344	52.1057	1943.77	390.159	55.2811		0.191077
C6mim	OcSO4	1778.31	2902.8	80.3	1822.66	2969.82	81.0155	3542.57	5869.92	106.843	1775.46	2889.07	80.3243	1789.03	2921.75	80.4922	1943.77	3160.72	83.0181		0.190033
C6mim	FAP	1778.31	7710.19	105.749	1822.66	7982.73	107.249	3542.57	15722	145.765	1775.46	7658.76	105.504	1789.03	7758.54	106.033	1943.77	8641.58	110.919		0.134362
C6mim	Phosph	1778.31	7322.91	109.153	1822.66	7392.66	109.7	3542.57	10643.6	132.03	1775.46	7333.31	109.311	1789.03	7342.23	109.302	1943.77	7597.83	111.27		0.189384
C6mim	Cl	1778.31	3.4225	49.2983	1822.66	9.9856	49.8347	3542.57	1256.7	74.0383	1775.46	1	49.3153	1789.03	9	49.4672	1943.77	49	51.4684		0.20647
C6mim	BF4	1778.31	51.8634	49.9114	1822.66	111.107	50.9611	3542.57	1604.48	76.4318	1775.46	43.6333	49.8698	1789.03	63.241	50.1398	1943.77	248.388	53.4883		0.191726
C6mim	PF6	1778.31	125.135	50.7291	1822.66	211.514	52.0129	3542.57	3223.46	86.4991	1775.46	111.678	50.6261	1789.03	142.086	51.0196	1943.77	430.419	55.2359		0.17035
C6mim	CH3COO	1778.31	31.523	49.6719	1822.66	57.9959	50.4002	3542.57	821.689	71.1016	1775.46	25.3247	49.6991	1789.03	37.3303	49.8397	1943.77	125.15	52.2877		0.21069
C6mim	DCA	1778.31	81.3496	50.3997	1822.66	108.877	51.1296	3542.57	944.679	72.1268	1775.46	68.6945	50.309	1789.03	88.2503	50.5767	1943.77	1.74788	51.0105		0.27863
C6mim	C(CN)3	1778.31	222.768	52.0635	1822.66	257.604	52.8322	3542.57	1367.68	75.1982	1775.46	204.403	51.9134	1789.03	231.512	52.2494	1943.77	342.682	54.7996		0.208947
C6mim	Ser	1778.31	202.374	51.8146	1822.66	249.897	52.7044	3542.57	1581.96	76.5634	1775.46	190.937	51.7784	1789.03	213.116	52.0192	1943.77	366.464	54.9636		0.197805
C6mim	Tau	1778.31	202.649	51.8549	1822.66	249.518	52.7438	3542.57	2432.11	82.1596	1775.46	191.306	51.8363	1789.03	216.344	52.1057	1943.77	382.727	55.1815		0.191703
C6mim	Lys	1778.31	908.61	60.3387	1822.66	962.631	61.161	3542.57	2643.91	84.7406	1775.46	898.772	60.349	1789.03	921.417	60.531	1943.77	1097.47	63.2772		0.196216
C6mim	Thr	1778.31	302.156	52.9716	1822.66	352.483	53.8726	3542.57	1820.55	78.2573	1775.46	291.004	52.9623	1789.03	313.63	53.1789	1943.77	477.559	56.1694		0.196103
C6mim	Pro	1778.31	274.927	52.7377	1822.66	318.299	53.5811	3542.57	1680.22	77.3721	1775.46	261.498	52.6972	1789.03	284.99	52.9339	1943.77	428.649	55.7584		0.200613
C6mim	Val	1778.31	303.597	52.9837	1822.66	346.745	53.8231	3542.57	1707.11	77.5399	1775.46	296.591	53.0377	1789.03	313.63	53.1789	1943.77	456.551	55.9911		0.199151
C6mim	NPf2	1778.31	6658.66	103.359	1822.66	6866.13	104.574	3542.57	13684.8	141.057	1775.46	6613.98	103.146	1789.03	6701.95	103.634	1943.77	7395.25	107.717		0.149561
C6mim	MeOHPO2	1778.31	55.565	49.9563	1822.66	90.1336	50.7573	3542.57	1904.8	78.4369	1775.46	47.9123	49.97	1789.03	66.7219	50.1896	1943.77	191.421	52.9623		0.19801
C6mim	Cys	1778.31	204.091	51.8287	1822.66	243.957	52.6553	3542.57	2342.92	81.4521	1775.46	190.937	51.7784	1789.03	218.17	52.0673	1943.77	366.464	54.9636		0.189824
C6mim	MeSO4	1778.31	107.281	50.6103	1822.66	152.556	51.517	3542.57	2269.5	80.8807	1775.46	95.9101	50.5964	1789.03	120.152	50.8626	1943.77	285.017	54		0.19201
C6mim	DMP	1778.31	187.969	51.5832	1822.66	233.047	52.4847	3542.57	2405.3	81.9304	1775.46	178.846	51.6236	1789.03	201.033	51.8363	1943.77	363.453	54.9272		0.19385
C6mim	NO3	1778.31	29.486	49.6491	1822.66	66.1359	50.4802	3542.57	985.608	72.2443	1775.46	21.583	49.6085	1789.03	37.3303	49.8397	1943.77	154.43	52.5642		0.204937
C6mim	NO2	1778.31	13.5392	49.4476	1822.66	40.3355	50.1838	3542.57	715.704	70.3224	1775.46	7.4641	49.4267	1789.03	19.3808	49.6185	1943.77	104.445	52.0481		0.21178
C6mim	SCN	1778.31	16.2447	49.4754	1822.66	29.805	50.079	3542.57	1375.96	74.873	1775.46	7.4641	49.4267	1789.03	24.3725	49.6689	1943.77	84.4425	51.8556		0.206085
C6mim	BrO3	1778.31	30.5918	49.6647	1822.66	65.6901	50.4754	3542.57	7161.03	106.803	1775.46	21.583	49.6085	1789.03	46.6333	49.96	1943.77	177.558	52.792		0.214248
C6mim	IO3	1778.31	31.1467	49.673	1822.66	64.1033	50.4587	3542.57	16878.2	145.35	1775.46	21.583	49.6085	1789.03	53.7951	50.05	1943.77	177.558	52.792		0.370219
C6mim	HCO3	1778.31	30.2022	49.659	1822.66	63.5545	50.4531	3542.57	933.767	71.8832	1775.46	21.8876	49.6185	1789.03	37.3303	49.8397	1943.77	145.581	52.4786		0.206063
C7mim	NTf2	2539.83	2198.94	78.8194	2587.45	2344.38	80.0372	4438.93	7682.48	117.681	2537.24	2167.13	78.6321	2551.32	2231.79	79.1202	2717.82	2727.4	83.2526		0.153824
C7mim	OTf	2539.83	239.692	61.4829	2587.45	318.974	62.5155	4438.93	3218	93.4073	2537.24	223.122	61.3759	2551.32	257.468	61.7333	2717.82	528.183	65.2304		0.174606
C7mim	EtSO4	2539.83	202.828	61.2526	2587.45	250.52	62.0565	4438.93	2489.89	89.5219	2537.24	190.879	61.2536	2551.32	216.344	61.4736	2717.82	390.159	64.2806		0.192518
C7mim	OcSO4	2539.83	2902.8	86.6679	2587.45	2969.82	87.35	4438.93	5869.92	112.337	2537.24	2889.07	86.6949	2551.32	2921.75	86.8504	2717.82	3160.72	89.2637		0.190291
C7mim	FAP	2539.83	7710.19	110.662	2587.45	7982.73	112.111	4438.93	15722	149.839	2537.24	7658.76	110.431	2551.32	7758.54	110.937	2717.82	8641.58	115.668		0.135252
C7mim	Phosph	2539.83	7322.91	113.919	2587.45	7392.66	114.457	4438.93	10643.6	136.514	2537.24	7333.31	114.075	2551.32	7342.23	114.066	2717.82	7597.83	116.004		0.188468
C7mim	Cl	2539.83	3.4225	59.1064	2587.45	9.9856	59.5818	4438.93	1256.7	81.7674	2537.24	1	59.127	2551.32	9	59.2537	2717.82	49	61.0328		0.209898
C7mim	BF4	2539.83	51.8634	59.6187	2587.45	111.107	60.5271	4438.93	1604.48	83.9408	2537.24	43.6333	59.5903	2551.32	63.241	59.8164	2717.82	248.388	62.7455		0.191962
C7mim	PF6	2539.83	125.135	60.3049	2587.45	211.514	61.4154	4438.93	3223.46	93.2005	2537.24	111.678	60.2246	2551.32	142.086	60.5558	2717.82	430.419	64.2417		0.172399
C7mim	CH3COO	2539.83	31.523	59.4183	2587.45	57.9959	60.0557	4438.93	821.689	79.1181	2537.24	25.3247	59.4475	2551.32	37.3303	59.5651	2717.82	125.15	61.7252		0.210806
C7mim	DCA	2539.83	81.3496	60.0281	2587.45	108.877	60.6691	4438.93	944.679	80.0408	2537.24	68.6945	59.9583	2551.32	88.2503	60.1831	2717.82	1.74788	60.6471		0.288117
C7mim	C(CN)3	2539.83	222.768	61.4317	2587.45	257.604	62.1108	4438.93	1367.68	82.8191	2537.24	204.403	61.3107	2551.32	231.512	61.5955	2717.82	342.682	63.867		0.210197
C7mim	Ser	2539.83	202.374	61.2208	2587.45	249.897	62.0021	4438.93	1581.96	84.0607	2537.24	190.937	61.1964	2551.32	213.116	61.4003	2717.82	366.464	64.0078		0.198155
C7mim	Tau	2539.83	202.649	61.255	2587.45	249.518	62.0356	4438.93	2432.11	89.1877	2537.24	191.306	61.2454	2551.32	216.344	61.4736	2717.82	382.727	64.195		0.193295
C7mim	Lys	2539.83	908.61	68.5857	2587.45	962.631	69.3338	4438.93	2643.91	91.5707	2537.24	898.772	68.6003	2551.32	921.417	68.7605	2717.82	1097.47	71.2741		0.196361
C7mim	Thr	2539.83	302.156	62.2031	2587.45	352.483	62.9981	4438.93	1820.55	85.6063	2537.24	291.004	62.2013	2551.32	313.63	62.3859	2717.82	477.559	65.0461		0.196418
C7mim	Pro	2539.83	274.927	62.0041	2587.45	318.299	62.749	4438.93	1680.22	84.7979	2537.24	261.498	61.9758	2551.32	284.99	62.1772	2717.82	428.649	64.6916		0.201363
C7mim	Val	2539.83	303.597	62.2134	2587.45	346.745	62.9558	4438.93	1707.11	84.9511	2537.24	296.591	62.2656	2551.32	313.63	62.3859	2717.82	456.551	64.8922		0.199421
C7mim	NPf2	2539.83	6658.66	108.38	2587.45	6866.13	109.555	4438.93	13684.8	145.263	2537.24	6613.98	108.18	2551.32	6701.95	108.646	2717.82	7395.25	112.601		0.150419
C7mim	MeOHPO2	2539.83	55.565	59.6563	2587.45	90.1336	60.3557	4438.93	1904.8	85.7705	2537.24	47.9123	59.6741	2551.32	66.7219	59.8582	2717.82	191.421	62.2977		0.199738
C7mim	Cys	2539.83	204.091	61.2328	2587.45	243.957	61.9603	4438.93	2342.92	88.5364	2537.24	190.937	61.1964	2551.32	218.17	61.441	2717.82	366.464	64.0078		0.191951
C7mim	MeSO4	2539.83	107.281	60.205	2587.45	152.556	60.9959	4438.93	2269.5	88.0109	2537.24	95.9101	60.1997	2551.32	120.152	60.4235	2717.82	285.017	63.1823		0.193449
C7mim	DMP	2539.83	187.969	61.0252	2587.45	233.047	61.8154	4438.93	2405.3	88.9765	2537.24	178.846	61.0655	2551.32	201.033	61.2454	2717.82	363.453	63.9766		0.195112
C7mim	NO3	2539.83	29.486	59.3992	2587.45	66.1359	60.1228	4438.93	985.608	80.1466	2537.24	21.583	59.3717	2551.32	37.3303	59.5651	2717.82	154.43	61.9597		0.204883
C7mim	NO2	2539.83	13.5392	59.231	2587.45	40.3355	59.8742	4438.93	715.704	78.4186	2537.24	7.4641	59.2199	2551.32	19.3808	59.3801	2717.82	104.445	61.5224		0.211684
C7mim	SCN	2539.83	16.2447	59.2541	2587.45	29.805	59.7864	4438.93	1375.96	82.524	2537.24	7.4641	59.2199	2551.32	24.3725	59.4222	2717.82	84.4425	61.3596		0.20885
C7mim	BrO3	2539.83	30.5918	59.4123	2587.45	65.6901	60.1188	4438.93	7161.03	112.3	2537.24	21.583	59.3717	2551.32	46.6333	59.6657	2717.82	177.558	62.153		0.229095
C7mim	IO3	2539.83	31.1467	59.4192	2587.45	64.1033	60.1048	4438.93	16878.2	149.435	2537.24	21.583	59.3717	2551.32	53.7951	59.7411	2717.82	177.558	62.153		0.393388
C7mim	HCO3	2539.83	30.2022	59.4076	2587.45	63.5545	60.1	4438.93	933.767	79.8213	2537.24	21.8876	59.3801	2551.32	37.3303	59.5651	2717.82	145.581	61.887		0.206269
C8mim	NTf2	3524.44	2198.94	87.1191	3575.35	2344.38	88.2409	5558.63	7682.48	123.964	3522.14	2167.13	86.954	3536.71	2231.79	87.3957	3715.02	2727.4	91.2195		0.156503
C8mim	OTf	3524.44	239.692	71.815	3575.35	318.974	72.7234	5558.63	3218	101.209	3522.14	223.122	71.7287	3536.71	257.468	72.0347	3715.02	528.183	75.1332		0.177416
C8mim	EtSO4	3524.44	202.828	71.6179	3575.35	250.52	72.3292	5558.63	2489.89	97.634	3522.14	190.879	71.624	3536.71	216.344	71.8123	3715.02	390.159	74.3102		0.194696
C8mim	OcSO4	3524.44	2902.8	94.2792	3575.35	2969.82	94.9238	5558.63	5869.92	118.903	3522.14	2889.07	94.308	3536.71	2921.75	94.451	3715.02	3160.72	96.7368		0.190834
C8mim	FAP	3524.44	7710.19	116.719	3575.35	7982.73	118.108	5558.63	15722	154.823	3522.14	7658.76	116.503	3536.71	7758.54	116.983	3715.02	8641.58	121.528		0.136603
C8mim	Phosph	3524.44	7322.91	119.811	3575.35	7392.66	120.337	5558.63	10643.6	141.966	3522.14	7333.31	119.962	3536.71	7342.23	119.954	3715.02	7597.83	121.848		0.18772
C8mim	Cl	3524.44	3.4225	69.7911	3575.35	9.9856	70.2175	5558.63	1256.7	90.5767	3522.14	1	69.814	3536.71	9	69.9214	3715.02	49	71.5192		0.213056
C8mim	BF4	3524.44	51.8634	70.2256	3575.35	111.107	71.0214	5558.63	1604.48	92.5435	3522.14	43.6333	70.2068	3536.71	63.241	70.3989	3715.02	248.388	72.9863		0.192734
C8mim	PF6	3524.44	125.135	70.8091	3575.35	211.514	71.7799	5558.63	3223.46	101.018	3522.14	111.678	70.746	3536.71	142.086	71.0282	3715.02	430.419	74.2765		0.175626
C8mim	CH3COO	3524.44	31.523	70.0555	3575.35	57.9959	70.62	5558.63	821.689	88.1925	3522.14	25.3247	70.0857	3536.71	37.3303	70.1855	3715.02	125.15	72.111		0.210958
C8mim	DCA	3524.44	81.3496	70.5734	3575.35	108.877	71.1424	5558.63	944.679	89.0211	3522.14	68.6945	70.5195	3536.71	88.2503	70.7107	3715.02	1.74788	71.1904		0.295741
C8mim	C(CN)3	3524.44	222.768	71.7711	3575.35	257.604	72.3757	5558.63	1367.68	91.5273	3522.14	204.403	71.6729	3536.71	231.512	71.9166	3715.02	342.682	73.9527		0.21142
C8mim	Ser	3524.44	202.374	71.5907	3575.35	249.897	72.2825	5558.63	1581.96	92.6523	3522.14	190.937	71.5751	3536.71	213.116	71.7496	3715.02	366.464	74.0743		0.198802
C8mim	Tau	3524.44	202.649	71.6199	3575.35	249.518	72.3113	5558.63	2432.11	97.3277	3522.14	191.306	71.617	3536.71	216.344	71.8123	3715.02	382.727	74.2361		0.195561
C8mim	Lys	3524.44	908.61	77.9823	3575.35	962.631	78.6618	5558.63	2643.91	99.516	3522.14	898.772	78	3536.71	921.417	78.1409	3715.02	1097.47	80.4363		0.196733
C8mim	Thr	3524.44	302.156	72.4325	3575.35	352.483	73.1387	5558.63	1820.55	94.0568	3522.14	291.004	72.4362	3536.71	313.63	72.5948	3715.02	477.559	74.9733		0.19707
C8mim	Pro	3524.44	274.927	72.2617	3575.35	318.299	72.9242	5558.63	1680.22	93.3216	3522.14	261.498	72.2426	3536.71	284.99	72.4155	3715.02	428.649	74.6659		0.202318
C8mim	Val	3524.44	303.597	72.4414	3575.35	346.745	73.1022	5558.63	1707.11	93.4608	3522.14	296.591	72.4914	3536.71	313.63	72.5948	3715.02	456.551	74.8398		0.199977
C8mim	NPf2	3524.44	6658.66	114.558	3575.35	6866.13	115.684	5558.63	13684.8	150.398	3522.14	6613.98	114.372	3536.71	6701.95	114.813	3715.02	7395.25	118.613		0.151725
C8mim	MeOHPO2	3524.44	55.565	70.2575	3575.35	90.1336	70.8753	5558.63	1904.8	94.2063	3522.14	47.9123	70.278	3536.71	66.7219	70.4344	3715.02	191.421	72.6017		0.201984
C8mim	Cys	3524.44	204.091	71.6009	3575.35	243.957	72.2467	5558.63	2342.92	96.7312	3522.14	190.937	71.5751	3536.71	218.17	71.7844	3715.02	366.464	74.0743		0.194582
C8mim	MeSO4	3524.44	107.281	70.724	3575.35	152.556	71.4213	5558.63	2269.5	96.2505	3522.14	95.9101	70.7248	3536.71	120.152	70.9154	3715.02	285.017	73.3621		0.195634
C8mim	DMP	3524.44	187.969	71.4235	3575.35	233.047	72.1225	5558.63	2405.3	97.1342	3522.14	178.846	71.4633	3536.71	201.033	71.617	3715.02	363.453	74.0473		0.19713
C8mim	NO3	3524.44	29.486	70.0393	3575.35	66.1359	70.6771	5558.63	985.608	89.1163	3522.14	21.583	70.0214	3536.71	37.3303	70.1855	3715.02	154.43	72.3118		0.205014
C8mim	NO2	3524.44	13.5392	69.8967	3575.35	40.3355	70.4658	5558.63	715.704	87.5655	3522.14	7.4641	69.8928	3536.71	19.3808	70.0286	3715.02	104.445	71.9375		0.211606
C8mim	SCN	3524.44	16.2447	69.9163	3575.35	29.805	70.3911	5558.63	1375.96	91.2603	3522.14	7.4641	69.8928	3536.71	24.3725	70.0643	3715.02	84.4425	71.7983		0.211564
C8mim	BrO3	3524.44	30.5918	70.0504	3575.35	65.6901	70.6737	5558.63	7161.03	118.867	3522.14	21.583	70.0214	3536.71	46.6333	70.2709	3715.02	177.558	72.4776		0.245333
C8mim	IO3	3524.44	31.1467	70.0563	3575.35	64.1033	70.6618	5558.63	16878.2	154.431	3522.14	21.583	70.0214	3536.71	53.7951	70.3349	3715.02	177.558	72.4776		0.420146
C8mim	HCO3	3524.44	30.2022	70.0464	3575.35	63.5545	70.6577	5558.63	933.767	88.8239	3522.14	21.8876	70.0286	3536.71	37.3303	70.1855	3715.02	145.581	72.2496		0.206566
C9mim	NTf2	4771.03	2198.94	96.6176	4825.23	2344.38	97.6471	6940.59	7682.48	131.352	4769.04	2167.13	96.4728	4784.08	2231.79	96.871	4974.22	2727.4	100.394		0.159561
C9mim	OTf	4771.03	239.692	83.0821	4825.23	318.974	83.888	6940.59	3218	110.134	4769.04	223.122	83.012	4784.08	257.468	83.2766	4974.22	528.183	86.0407		0.180337
C9mim	EtSO4	4771.03	202.828	82.9118	4825.23	250.52	83.5465	6940.59	2489.89	106.858	4769.04	190.879	82.9216	4784.08	216.344	83.0843	4974.22	390.159	85.3229		0.196784
C9mim	OcSO4	4771.03	2902.8	103.12	4825.23	2969.82	103.726	6940.59	5869.92	126.586	4769.04	2889.07	103.15	4784.08	2921.75	103.281	4974.22	3160.72	105.432		0.191357
C9mim	FAP	4771.03	7710.19	123.97	4825.23	7982.73	125.291	6940.59	15722	160.799	4769.04	7658.76	123.77	4784.08	7758.54	124.222	4974.22	8641.58	128.557		0.138222
C9mim	Phosph	4771.03	7322.91	126.886	4825.23	7392.66	127.395	6940.59	10643.6	148.461	4769.04	7333.31	127.031	4784.08	7342.23	127.024	4974.22	7597.83	128.86		0.186944
C9mim	Cl	4771.03	3.4225	81.3391	4825.23	9.9856	81.7252	6940.59	1256.7	100.451	4769.04	1	81.3634	4784.08	9	81.4555	4974.22	49	82.9036		0.215386
C9mim	BF4	4771.03	51.8634	81.7121	4825.23	111.107	82.4169	6940.59	1604.48	102.228	4769.04	43.6333	81.7007	4784.08	63.241	81.8657	4974.22	248.388	84.1724		0.193287
C9mim	PF6	4771.03	125.135	82.2141	4825.23	211.514	83.0714	6940.59	3223.46	109.958	4769.04	111.678	82.1645	4784.08	142.086	82.4075	4974.22	430.419	85.2936		0.178995
C9mim	CH3COO	4771.03	31.523	81.566	4825.23	57.9959	82.0712	6940.59	821.689	98.3065	4769.04	25.3247	81.5966	4784.08	37.3303	81.6823	4974.22	125.15	83.4146		0.21061
C9mim	DCA	4771.03	81.3496	82.0113	4825.23	108.877	82.5212	6940.59	944.679	99.0505	4769.04	68.6945	81.9695	4784.08	88.2503	82.134	4974.22	1.74788	82.62		0.301429
C9mim	C(CN)3	4771.03	222.768	83.0441	4825.23	257.604	83.5868	6940.59	1367.68	101.309	4769.04	204.403	82.9638	4784.08	231.512	83.1745	4974.22	342.682	85.0118		0.212104
C9mim	Ser	4771.03	202.374	82.8883	4825.23	249.897	83.5061	6940.59	1581.96	102.326	4769.04	190.937	82.8794	4784.08	213.116	83.0301	4974.22	366.464	85.1176		0.199132
C9mim	Tau	4771.03	202.649	82.9135	4825.23	249.518	83.5309	6940.59	2432.11	106.578	4769.04	191.306	82.9156	4784.08	216.344	83.0843	4974.22	382.727	85.2584		0.19769
C9mim	Lys	4771.03	908.61	88.4674	4825.23	962.631	89.0852	6940.59	2643.91	108.58	4769.04	898.772	88.4873	4784.08	921.417	88.6115	4974.22	1097.47	90.7083		0.196889
C9mim	Thr	4771.03	302.156	83.6164	4825.23	352.483	84.2483	6940.59	1820.55	103.6	4769.04	291.004	83.6242	4784.08	313.63	83.7616	4974.22	477.559	85.9011		0.197458
C9mim	Pro	4771.03	274.927	83.4685	4825.23	318.299	84.0621	6940.59	1680.22	102.933	4769.04	261.498	83.4566	4784.08	284.99	83.6062	4974.22	428.649	85.6329		0.202905
C9mim	Val	4771.03	303.597	83.6241	4825.23	346.745	84.2166	6940.59	1707.11	103.059	4769.04	296.591	83.672	4784.08	313.63	83.7616	4974.22	456.551	85.7846		0.200237
C9mim	NPf2	4771.03	6658.66	121.937	4825.23	6866.13	123.009	6940.59	13684.8	156.544	4769.04	6613.98	121.766	4784.08	6701.95	122.18	4974.22	7395.25	125.805		0.153272
C9mim	MeOHPO2	4771.03	55.565	81.7395	4825.23	90.1336	82.291	6940.59	1904.8	103.736	4769.04	47.9123	81.7618	4784.08	66.7219	81.8963	4974.22	191.421	83.8391		0.20393
C9mim	Cys	4771.03	204.091	82.8971	4825.23	243.957	83.4751	6940.59	2342.92	106.034	4769.04	190.937	82.8794	4784.08	218.17	83.0602	4974.22	366.464	85.1176		0.196953
C9mim	MeSO4	4771.03	107.281	82.1409	4825.23	152.556	82.7618	6940.59	2269.5	105.595	4769.04	95.9101	82.1462	4784.08	120.152	82.3104	4974.22	285.017	84.4985		0.197689
C9mim	DMP	4771.03	187.969	82.7439	4825.23	233.047	83.3676	6940.59	2405.3	106.402	4769.04	178.846	82.7828	4784.08	201.033	82.9156	4974.22	363.453	85.0941		0.199063
C9mim	NO3	4771.03	29.486	81.5521	4825.23	66.1359	82.1204	6940.59	985.608	99.1361	4769.04	21.583	81.5414	4784.08	37.3303	81.6823	4974.22	154.43	83.5883		0.204736
C9mim	NO2	4771.03	13.5392	81.4297	4825.23	40.3355	81.9385	6940.59	715.704	97.7444	4769.04	7.4641	81.431	4784.08	19.3808	81.5475	4974.22	104.445	83.2646		0.211029
C9mim	SCN	4771.03	16.2447	81.4465	4825.23	29.805	81.8744	6940.59	1375.96	101.068	4769.04	7.4641	81.431	4784.08	24.3725	81.5782	4974.22	84.4425	83.1445		0.213602
C9mim	BrO3	4771.03	30.5918	81.5616	4825.23	65.6901	82.1175	6940.59	7161.03	126.553	4769.04	21.583	81.5414	4784.08	46.6333	81.7557	4974.22	177.558	83.7317		0.261492
C9mim	IO3	4771.03	31.1467	81.5667	4825.23	64.1033	82.1072	6940.59	16878.2	160.422	4769.04	21.583	81.5414	4784.08	53.7951	81.8108	4974.22	177.558	83.7317		0.448489
C9mim	HCO3	4771.03	30.2022	81.5582	4825.23	63.5545	82.1037	6940.59	933.767	98.8733	4769.04	21.8876	81.5475	4784.08	37.3303	81.6823	4974.22	145.581	83.5344		0.206391
C10mim	NTf2	6321.41	2198.94	107.267	6378.89	2344.38	108.21	8626.59	7682.48	139.877	6319.75	2167.13	107.14	6335.23	2231.79	107.499	6537.21	2727.4	110.738		0.16258
C10mim	OTf	6321.41	239.692	95.2569	6378.89	318.974	95.9776	8626.59	3218	120.173	6319.75	223.122	95.1998	6335.23	257.468	95.4306	6537.21	528.183	97.9132		0.182734
C10mim	EtSO4	6321.41	202.828	95.1084	6378.89	250.52	95.6792	8626.59	2489.89	117.179	6319.75	190.879	95.121	6335.23	216.344	95.2628	6537.21	390.159	97.2831		0.198234
C10mim	OcSO4	6321.41	2902.8	113.159	6378.89	2969.82	113.726	8626.59	5869.92	135.412	6319.75	2889.07	113.19	6335.23	2921.75	113.309	6537.21	3160.72	115.326		0.19157
C10mim	FAP	6321.41	7710.19	132.438	6378.89	7982.73	133.688	8626.59	15722	167.835	6319.75	7658.76	132.254	6335.23	7758.54	132.676	6537.21	8641.58	136.788		0.139896
C10mim	Phosph	6321.41	7322.91	135.171	6378.89	7392.66	135.661	8626.59	10643.6	156.054	6319.75	7333.31	135.311	6335.23	7342.23	135.303	6537.21	7597.83	137.073		0.185952
C10mim	Cl	6321.41	3.4225	93.7405	6378.89	9.9856	94.0931	8626.59	1256.7	111.367	6319.75	1	93.7657	6335.23	9	93.8456	6537.21	49	95.1683		0.216591
C10mim	BF4	6321.41	51.8634	94.0644	6378.89	111.107	94.6945	8626.59	1604.48	112.972	6319.75	43.6333	94.0585	6335.23	63.241	94.2019	6537.21	248.388	96.2756		0.19316
C10mim	PF6	6321.41	125.135	94.5008	6378.89	211.514	95.2647	8626.59	3223.46	120.013	6319.75	111.678	94.4616	6335.23	142.086	94.6731	6537.21	430.419	97.2574		0.181817
C10mim	CH3COO	6321.41	31.523	93.9375	6378.89	57.9959	94.3938	8626.59	821.689	109.437	6319.75	25.3247	93.9681	6335.23	37.3303	94.0425	6537.21	125.15	95.6138		0.209457
C10mim	DCA	6321.41	81.3496	94.3244	6378.89	108.877	94.7853	8626.59	944.679	110.106	6319.75	68.6945	94.2921	6335.23	88.2503	94.4352	6537.21	1.74788	94.9214		0.305208
C10mim	C(CN)3	6321.41	222.768	95.2238	6378.89	257.604	95.7144	8626.59	1367.68	112.142	6319.75	204.403	95.1578	6335.23	231.512	95.3415	6537.21	342.682	97.0103		0.211933
C10mim	Ser	6321.41	202.374	95.0879	6378.89	249.897	95.644	8626.59	1581.96	113.062	6319.75	190.937	95.0842	6335.23	213.116	95.2155	6537.21	366.464	97.103		0.198755
C10mim	Tau	6321.41	202.649	95.1099	6378.89	249.518	95.6657	8626.59	2432.11	116.924	6319.75	191.306	95.1157	6335.23	216.344	95.2628	6537.21	382.727	97.2265		0.199152
C10mim	Lys	6321.41	908.61	99.9886	6378.89	962.631	100.552	8626.59	2643.91	118.752	6319.75	898.772	100.01	6335.23	921.417	100.12	6537.21	1097.47	102.039		0.196482
C10mim	Thr	6321.41	302.156	95.7233	6378.89	352.483	96.2926	8626.59	1820.55	114.215	6319.75	291.004	95.734	6335.23	313.63	95.8541	6537.21	477.559	97.7906		0.19718
C10mim	Pro	6321.41	274.927	95.5941	6378.89	318.299	96.1298	8626.59	1680.22	113.611	6319.75	261.498	95.5877	6335.23	284.99	95.7183	6537.21	428.649	97.5551		0.20275
C10mim	Val	6321.41	303.597	95.73	6378.89	346.745	96.2649	8626.59	1707.11	113.725	6319.75	296.591	95.7758	6335.23	313.63	95.8541	6537.21	456.551	97.6883		0.199815
C10mim	NPf2	6321.41	6658.66	130.537	6378.89	6866.13	131.552	8626.59	13684.8	163.762	6319.75	6613.98	130.38	6335.23	6701.95	130.767	6537.21	7395.25	134.205		0.154837
C10mim	MeOHPO2	6321.41	55.565	94.0882	6378.89	90.1336	94.585	8626.59	1904.8	114.339	6319.75	47.9123	94.1116	6335.23	66.7219	94.2284	6537.21	191.421	95.9844		0.205084
C10mim	Cys	6321.41	204.091	95.0956	6378.89	243.957	95.6169	8626.59	2342.92	116.428	6319.75	190.937	95.0842	6335.23	218.17	95.2418	6537.21	366.464	97.103		0.198568
C10mim	MeSO4	6321.41	107.281	94.4371	6378.89	152.556	94.9948	8626.59	2269.5	116.029	6319.75	95.9101	94.4458	6335.23	120.152	94.5886	6537.21	285.017	96.5609		0.199063
C10mim	DMP	6321.41	187.969	94.962	6378.89	233.047	95.5231	8626.59	2405.3	116.763	6319.75	178.846	95	6335.23	201.033	95.1157	6537.21	363.453	97.0824		0.200363
C10mim	NO3	6321.41	29.486	93.9254	6378.89	66.1359	94.4365	8626.59	985.608	110.183	6319.75	21.583	93.9202	6335.23	37.3303	94.0425	6537.21	154.43	95.7653		0.203699
C10mim	NO2	6321.41	13.5392	93.8191	6378.89	40.3355	94.2785	8626.59	715.704	108.932	6319.75	7.4641	93.8243	6335.23	19.3808	93.9255	6537.21	104.445	95.483		0.209654
C10mim	SCN	6321.41	16.2447	93.8337	6378.89	29.805	94.2227	8626.59	1375.96	111.924	6319.75	7.4641	93.8243	6335.23	24.3725	93.9521	6537.21	84.4425	95.3782		0.214619
C10mim	BrO3	6321.41	30.5918	93.9337	6378.89	65.6901	94.434	8626.59	7161.03	135.381	6319.75	21.583	93.9202	6335.23	46.6333	94.1063	6537.21	177.558	95.8906		0.276593
C10mim	IO3	6321.41	31.1467	93.9381	6378.89	64.1033	94.4251	8626.59	16878.2	167.474	6319.75	21.583	93.9202	6335.23	53.7951	94.1541	6537.21	177.558	95.8906		0.476918
C10mim	HCO3	6321.41	30.2022	93.9307	6378.89	63.5545	94.422	8626.59	933.767	109.946	6319.75	21.8876	93.9255	6335.23	37.3303	94.0425	6537.21	145.581	95.7183		0.205417
C4mpyrr	NTf2	694.194	2198.94	60.2143	728.579	2344.38	61.6904	2139.18	7682.48	103.856	706.327	2167.13	60.05	702.351	2231.79	60.5805	825.935	2727.4	65.5439		0.15206
C4mpyrr	OTf	694.194	239.692	34.5459	728.579	318.974	36.1655	2139.18	3218	75.2474	706.327	223.122	34.4964	702.351	257.468	34.9428	825.935	528.183	40.2492		0.18093
C4mpyrr	EtSO4	694.194	202.828	34.1343	728.579	250.52	35.3661	2139.18	2489.89	70.3662	706.327	190.879	34.2783	702.351	216.344	34.4819	825.935	390.159	38.6911		0.198633
C4mpyrr	OcSO4	694.194	2902.8	70.1754	728.579	2969.82	70.9209	2139.18	5869.92	97.7591	706.327	2889.07	70.278	702.351	2921.75	70.3776	825.935	3160.72	73.0274		0.19209
C4mpyrr	FAP	694.194	7710.19	98.2816	728.579	7982.73	99.8434	2139.18	15722	139.244	706.327	7658.76	98.0714	702.351	7758.54	98.5748	825.935	8641.58	103.653		0.13461
C4mpyrr	Phosph	694.194	7322.91	101.935	728.579	7392.66	102.471	2139.18	10643.6	124.794	706.327	7333.31	102.157	702.351	7342.23	102.083	825.935	7597.83	104.029		0.192798
C4mpyrr	Cl	694.194	3.4225	30.1137	728.579	9.9856	30.818	2139.18	1256.7	60.1926	706.327	1	30.315	702.351	9	30.348	825.935	49	33.0151		0.205702
C4mpyrr	BF4	694.194	51.8634	31.1072	728.579	111.107	32.6081	2139.18	1604.48	63.1134	706.327	43.6333	31.209	702.351	63.241	31.4325	825.935	248.388	36.0832		0.20232
C4mpyrr	PF6	694.194	125.135	32.403	728.579	211.514	34.2287	2139.18	3223.46	74.9905	706.327	111.678	32.4037	702.351	142.086	32.8177	825.935	430.419	38.6264		0.18026
C4mpyrr	CH3COO	694.194	31.523	30.7215	728.579	57.9959	31.7244	2139.18	821.689	56.5413	706.327	25.3247	30.9354	702.351	37.3303	30.9516	825.935	125.15	34.2783		0.218027
C4mpyrr	DCA	694.194	81.3496	31.8848	728.579	108.877	32.8709	2139.18	944.679	57.8253	706.327	68.6945	31.9061	702.351	88.2503	32.1248	825.935	1.74788	32.2966		0.252925
C4mpyrr	C(CN)3	694.194	222.768	34.4546	728.579	257.604	35.4612	2139.18	1367.68	61.6136	706.327	204.403	34.3802	702.351	231.512	34.6987	825.935	342.682	38		0.211909
C4mpyrr	Ser	694.194	202.374	34.0773	728.579	249.897	35.2706	2139.18	1581.96	63.2728	706.327	190.937	34.176	702.351	213.116	34.3511	825.935	366.464	38.2361		0.204811
C4mpyrr	Tau	694.194	202.649	34.1386	728.579	249.518	35.3294	2139.18	2432.11	69.9406	706.327	191.306	34.2637	702.351	216.344	34.4819	825.935	382.727	38.5487		0.198577
C4mpyrr	Lys	694.194	908.61	46.0138	728.579	962.631	46.978	2139.18	2643.91	72.9551	706.327	898.772	46.1411	702.351	921.417	46.2385	825.935	1097.47	49.4469		0.20008
C4mpyrr	Thr	694.194	302.156	35.812	728.579	352.483	36.9935	2139.18	1820.55	65.3122	706.327	291.004	35.9444	702.351	313.63	36.0832	825.935	477.559	39.95		0.20267
C4mpyrr	Pro	694.194	274.927	35.4652	728.579	318.299	36.5675	2139.18	1680.22	64.2489	706.327	261.498	35.5528	702.351	284.99	35.7211	825.935	428.649	39.37		0.205638
C4mpyrr	Val	694.194	303.597	35.8299	728.579	346.745	36.9213	2139.18	1707.11	64.4509	706.327	296.591	36.0555	702.351	313.63	36.0832	825.935	456.551	39.6989		0.205507
C4mpyrr	NPf2	694.194	6658.66	95.7054	728.579	6866.13	96.9643	2139.18	13684.8	134.308	706.327	6613.98	95.5301	702.351	6701.95	95.9896	825.935	7395.25	100.22		0.149924
C4mpyrr	MeOHPO2	694.194	55.565	31.1792	728.579	90.1336	32.2888	2139.18	1904.8	65.5273	706.327	47.9123	31.3688	702.351	66.7219	31.5119	825.935	191.421	35.2987		0.205738
C4mpyrr	Cys	694.194	204.091	34.0987	728.579	243.957	35.1971	2139.18	2342.92	69.1081	706.327	190.937	34.176	702.351	218.17	34.4238	825.935	366.464	38.2361		0.194595
C4mpyrr	MeSO4	694.194	107.281	32.2166	728.579	152.556	33.4702	2139.18	2269.5	68.4337	706.327	95.9101	32.3574	702.351	120.152	32.573	825.935	285.017	36.8375		0.200985
C4mpyrr	DMP	694.194	187.969	33.7245	728.579	233.047	34.9414	2139.18	2405.3	69.6711	706.327	178.846	33.9411	702.351	201.033	34.0735	825.935	363.453	38.1838		0.202185
C4mpyrr	NO3	694.194	29.486	30.6845	728.579	66.1359	31.8513	2139.18	985.608	57.9717	706.327	21.583	30.7896	702.351	37.3303	30.9516	825.935	154.43	34.6987		0.213804
C4mpyrr	NO2	694.194	13.5392	30.3575	728.579	40.3355	31.3795	2139.18	715.704	55.5583	706.327	7.4641	30.4959	702.351	19.3808	30.5941	825.935	104.445	33.9116		0.219587
C4mpyrr	SCN	694.194	16.2447	30.4027	728.579	29.805	31.2116	2139.18	1375.96	61.2164	706.327	7.4641	30.4959	702.351	24.3725	30.6757	825.935	84.4425	33.6155		0.208151
C4mpyrr	BrO3	694.194	30.5918	30.7098	728.579	65.6901	31.8438	2139.18	7161.03	97.7162	706.327	21.583	30.7896	702.351	46.6333	31.1448	825.935	177.558	35.0428		0.199511
C4mpyrr	IO3	694.194	31.1467	30.7232	728.579	64.1033	31.8173	2139.18	16878.2	138.809	706.327	21.583	30.7896	702.351	53.7951	31.289	825.935	177.558	35.0428		0.347536
C4mpyrr	HCO3	694.194	30.2022	30.7007	728.579	63.5545	31.8083	2139.18	933.767	57.5211	706.327	21.8876	30.8058	702.351	37.3303	30.9516	825.935	145.581	34.5688		0.213675
P6,6,6,14	NTf2	73680.2	2198.94	308.048	73781.9	2344.38	308.452	78490.2	7682.48	325.666	73719.4	2167.13	308.058	73706.7	2231.79	308.154	74088.8	2727.4	309.606		0.156526
P6,6,6,14	OTf	73680.2	239.692	304.074	73781.9	318.974	304.377	78490.2	3218	317.702	73719.4	223.122	304.112	73706.7	257.468	304.155	74088.8	528.183	305.254		0.155054
P6,6,6,14	EtSO4	73680.2	202.828	304.028	73781.9	250.52	304.283	78490.2	2489.89	316.581	73719.4	190.879	304.087	73706.7	216.344	304.102	74088.8	390.159	305.052		0.161862
P6,6,6,14	OcSO4	73680.2	2902.8	310.149	73781.9	2969.82	310.43	78490.2	5869.92	323.773	73719.4	2889.07	310.214	73706.7	2921.75	310.229	74088.8	3160.72	311.276		0.15785
P6,6,6,14	FAP	73680.2	7710.19	317.69	73781.9	7982.73	318.286	78490.2	15722	338.617	73719.4	7658.76	317.666	73706.7	7758.54	317.814	74088.8	8641.58	319.85		0.138701
P6,6,6,14	Phosph	73680.2	7322.91	318.84	73781.9	7392.66	319.12	78490.2	10643.6	332.935	73719.4	7333.31	318.951	73706.7	7342.23	318.92	74088.8	7597.83	319.972		0.150417
P6,6,6,14	Cl	73680.2	3.4225	303.603	73781.9	9.9856	303.788	78490.2	1256.7	314.477	73719.4	1	303.666	73706.7	9	303.661	74088.8	49	304.385		0.172354
P6,6,6,14	BF4	73680.2	51.8634	303.703	73781.9	111.107	303.974	78490.2	1604.48	315.049	73719.4	43.6333	303.756	73706.7	63.241	303.771	74088.8	248.388	304.733		0.144341
P6,6,6,14	PF6	73680.2	125.135	303.839	73781.9	211.514	304.152	78490.2	3223.46	317.641	73719.4	111.678	303.882	73706.7	142.086	303.918	74088.8	430.419	305.044		0.156597
P6,6,6,14	CH3COO	73680.2	31.523	303.664	73781.9	57.9959	303.881	78490.2	821.689	313.798	73719.4	25.3247	303.728	73706.7	37.3303	303.722	74088.8	125.15	304.524		0.151878
P6,6,6,14	DCA	73680.2	81.3496	303.784	73781.9	108.877	304.003	78490.2	944.679	314.032	73719.4	68.6945	303.829	73706.7	88.2503	303.844	74088.8	1.74788	304.308		0.271175
P6,6,6,14	C(CN)3	73680.2	222.768	304.064	73781.9	257.604	304.294	78490.2	1367.68	314.752	73719.4	204.403	304.099	73706.7	231.512	304.127	74088.8	342.682	304.966		0.161183
P6,6,6,14	Ser	73680.2	202.374	304.022	73781.9	249.897	304.271	78490.2	1581.96	315.081	73719.4	190.937	304.076	73706.7	213.116	304.087	74088.8	366.464	304.995		0.14817
P6,6,6,14	Tau	73680.2	202.649	304.028	73781.9	249.518	304.278	78490.2	2432.11	316.487	73719.4	191.306	304.086	73706.7	216.344	304.102	74088.8	382.727	305.034		0.162481
P6,6,6,14	Lys	73680.2	908.61	305.59	73781.9	962.631	305.85	78490.2	2643.91	317.167	73719.4	898.772	305.652	73706.7	921.417	305.658	74088.8	1097.47	306.602		0.149108
P6,6,6,14	Thr	73680.2	302.156	304.221	73781.9	352.483	304.476	78490.2	1820.55	315.497	73719.4	291.004	304.279	73706.7	313.63	304.288	74088.8	477.559	305.215		0.148016
P6,6,6,14	Pro	73680.2	274.927	304.18	73781.9	318.299	304.425	78490.2	1680.22	315.278	73719.4	261.498	304.233	73706.7	284.99	304.245	74088.8	428.649	305.139		0.153555
P6,6,6,14	Val	73680.2	303.597	304.223	73781.9	346.745	304.467	78490.2	1707.11	315.319	73719.4	296.591	304.293	73706.7	313.63	304.288	74088.8	456.551	305.182		0.149397
P6,6,6,14	NPf2	73680.2	6658.66	316.903	73781.9	6866.13	317.394	78490.2	13684.8	336.617	73719.4	6613.98	316.891	73706.7	6701.95	317.022	74088.8	7395.25	318.754		0.149948
P6,6,6,14	MeOHPO2	73680.2	55.565	303.71	73781.9	90.1336	303.94	78490.2	1904.8	315.541	73719.4	47.9123	303.773	73706.7	66.7219	303.78	74088.8	191.421	304.641		0.164218
P6,6,6,14	Cys	73680.2	204.091	304.024	73781.9	243.957	304.263	78490.2	2342.92	316.304	73719.4	190.937	304.076	73706.7	218.17	304.095	74088.8	366.464	304.995		0.161951
P6,6,6,14	MeSO4	73680.2	107.281	303.819	73781.9	152.556	304.068	78490.2	2269.5	316.157	73719.4	95.9101	303.877	73706.7	120.152	303.891	74088.8	285.017	304.823		0.161258
P6,6,6,14	DMP	73680.2	187.969	303.982	73781.9	233.047	304.233	78490.2	2405.3	316.428	73719.4	178.846	304.049	73706.7	201.033	304.056	74088.8	363.453	304.989		0.162832
P6,6,6,14	NO3	73680.2	29.486	303.66	73781.9	66.1359	303.894	78490.2	985.608	314.059	73719.4	21.583	303.714	73706.7	37.3303	303.722	74088.8	154.43	304.572		0.147458
P6,6,6,14	NO2	73680.2	13.5392	303.627	73781.9	40.3355	303.845	78490.2	715.704	313.623	73719.4	7.4641	303.684	73706.7	19.3808	303.686	74088.8	104.445	304.483		0.150576
P6,6,6,14	SCN	73680.2	16.2447	303.632	73781.9	29.805	303.828	78490.2	1375.96	314.674	73719.4	7.4641	303.684	73706.7	24.3725	303.694	74088.8	84.4425	304.45		0.17014
P6,6,6,14	BrO3	73680.2	30.5918	303.663	73781.9	65.6901	303.893	78490.2	7161.03	323.76	73719.4	21.583	303.714	73706.7	46.6333	303.742	74088.8	177.558	304.611		0.339801
P6,6,6,14	IO3	73680.2	31.1467	303.664	73781.9	64.1033	303.891	78490.2	16878.2	338.438	73719.4	21.583	303.714	73706.7	53.7951	303.756	74088.8	177.558	304.611		0.680496
P6,6,6,14	HCO3	73680.2	30.2022	303.662	73781.9	63.5545	303.89	78490.2	933.767	313.976	73719.4	21.8876	303.715	73706.7	37.3303	303.722	74088.8	145.581	304.557		0.149203
P4,4,4,1	NTf2	2691.94	2198.94	77.6793	2734.34	2344.38	78.875	5179.34	7682.48	120.499	2716.36	2167.13	77.6273	2704.57	2231.79	78.0064	2868.98	2727.4	82.1827		0.143274
P4,4,4,1	OTf	2691.94	239.692	60.0145	2734.34	318.974	61.0206	5179.34	3218	96.9329	2716.36	223.122	60.0833	2704.57	257.468	60.2993	2868.98	528.183	63.8592		0.15992
P4,4,4,1	EtSO4	2691.94	202.828	59.7785	2734.34	250.52	60.5502	5179.34	2489.89	93.1946	2716.36	190.879	59.9583	2704.57	216.344	60.0333	2868.98	390.159	62.8888		0.17632
P4,4,4,1	OcSO4	2691.94	2902.8	85.6324	2734.34	2969.82	86.2864	5179.34	5869.92	115.285	2716.36	2889.07	85.7846	2704.57	2921.75	85.8371	2868.98	3160.72	88.2666		0.177365
P4,4,4,1	FAP	2691.94	7710.19	109.853	2734.34	7982.73	111.285	5179.34	15722	152.062	2716.36	7658.76	109.718	2704.57	7758.54	110.145	2868.98	8641.58	114.9		0.127707
P4,4,4,1	Phosph	2691.94	7322.91	113.133	2734.34	7392.66	113.648	5179.34	10643.6	138.951	2716.36	7333.31	113.384	2704.57	7342.23	113.296	2868.98	7597.83	115.239		0.178576
P4,4,4,1	Cl	2691.94	3.4225	57.5774	2734.34	9.9856	58.0113	5179.34	1256.7	85.7728	2716.36	1	57.7841	2704.57	9	57.7581	2868.98	49	59.5651		0.19039
P4,4,4,1	BF4	2691.94	51.8634	58.1032	2734.34	111.107	58.9818	5179.34	1604.48	87.8471	2716.36	43.6333	58.258	2704.57	63.241	58.3352	2868.98	248.388	61.3188		0.173804
P4,4,4,1	PF6	2691.94	125.135	58.8071	2734.34	211.514	59.893	5179.34	3223.46	96.7337	2716.36	111.678	58.9067	2704.57	142.086	59.0931	2868.98	430.419	62.849		0.15791
P4,4,4,1	CH3COO	2691.94	31.523	57.8976	2734.34	57.9959	58.4979	5179.34	821.689	83.2511	2716.36	25.3247	58.112	2704.57	37.3303	58.0775	2868.98	125.15	60.2744		0.19022
P4,4,4,1	DCA	2691.94	81.3496	58.5232	2734.34	108.877	59.1275	5179.34	944.679	84.1284	2716.36	68.6945	58.6345	2704.57	88.2503	58.7112	2868.98	1.74788	59.1698		0.266618
P4,4,4,1	C(CN)3	2691.94	222.768	59.962	2734.34	257.604	60.6058	5179.34	1367.68	86.7759	2716.36	204.403	60.0167	2704.57	231.512	60.1581	2868.98	342.682	62.466		0.190851
P4,4,4,1	Ser	2691.94	202.374	59.746	2734.34	249.897	60.4945	5179.34	1581.96	87.9617	2716.36	190.937	59.8999	2704.57	213.116	59.9583	2868.98	366.464	62.6099		0.179593
P4,4,4,1	Tau	2691.94	202.649	59.781	2734.34	249.518	60.5288	5179.34	2432.11	92.8736	2716.36	191.306	59.95	2704.57	216.344	60.0333	2868.98	382.727	62.8013		0.176932
P4,4,4,1	Lys	2691.94	908.61	67.2725	2734.34	962.631	67.9889	5179.34	2643.91	95.1644	2716.36	898.772	67.4463	2704.57	921.417	67.4759	2868.98	1097.47	70.0214		0.17942
P4,4,4,1	Thr	2691.94	302.156	60.7521	2734.34	352.483	61.5149	5179.34	1820.55	89.4399	2716.36	291.004	60.9262	2704.57	313.63	60.9672	2868.98	477.559	63.671		0.178338
P4,4,4,1	Pro	2691.94	274.927	60.5483	2734.34	318.299	61.2597	5179.34	1680.22	88.6665	2716.36	261.498	60.696	2704.57	284.99	60.7536	2868.98	428.649	63.3088		0.182895
P4,4,4,1	Val	2691.94	303.597	60.7627	2734.34	346.745	61.4715	5179.34	1707.11	88.813	2716.36	296.591	60.9918	2704.57	313.63	60.9672	2868.98	456.551	63.5138		0.181029
P4,4,4,1	NPf2	2691.94	6658.66	107.554	2734.34	6866.13	108.709	5179.34	13684.8	147.555	2716.36	6613.98	107.452	2704.57	6701.95	107.838	2868.98	7395.25	111.812		0.142312
P4,4,4,1	MeOHPO2	2691.94	55.565	58.1417	2734.34	90.1336	58.8059	5179.34	1904.8	89.5971	2716.36	47.9123	58.3438	2704.57	66.7219	58.3781	2868.98	191.421	60.8605		0.182256
P4,4,4,1	Cys	2691.94	204.091	59.7582	2734.34	243.957	60.4516	5179.34	2342.92	92.2483	2716.36	190.937	59.8999	2704.57	218.17	60	2868.98	366.464	62.6099		0.17524
P4,4,4,1	MeSO4	2691.94	107.281	58.7046	2734.34	152.556	59.4628	5179.34	2269.5	91.7441	2716.36	95.9101	58.8812	2704.57	120.152	58.9576	2868.98	285.017	61.7657		0.176876
P4,4,4,1	DMP	2691.94	187.969	59.5454	2734.34	233.047	60.3031	5179.34	2405.3	92.6708	2716.36	178.846	59.7662	2704.57	201.033	59.7997	2868.98	363.453	62.578		0.178758
P4,4,4,1	NO3	2691.94	29.486	57.878	2734.34	66.1359	58.5668	5179.34	985.608	84.2291	2716.36	21.583	58.0345	2704.57	37.3303	58.0775	2868.98	154.43	60.5145		0.184886
P4,4,4,1	NO2	2691.94	13.5392	57.7053	2734.34	40.3355	58.3116	5179.34	715.704	82.5866	2716.36	7.4641	57.8792	2704.57	19.3808	57.8878	2868.98	104.445	60.0666		0.190795
P4,4,4,1	SCN	2691.94	16.2447	57.729	2734.34	29.805	58.2214	5179.34	1375.96	86.4943	2716.36	7.4641	57.8792	2704.57	24.3725	57.931	2868.98	84.4425	59.8999		0.189775
P4,4,4,1	BrO3	2691.94	30.5918	57.8914	2734.34	65.6901	58.5627	5179.34	7161.03	115.249	2716.36	21.583	58.0345	2704.57	46.6333	58.1808	2868.98	177.558	60.7124		0.219527
P4,4,4,1	IO3	2691.94	31.1467	57.8985	2734.34	64.1033	58.5483	5179.34	16878.2	151.664	2716.36	21.583	58.0345	2704.57	53.7951	58.258	2868.98	177.558	60.7124		0.390467
P4,4,4,1	HCO3	2691.94	30.2022	57.8865	2734.34	63.5545	58.5434	5179.34	933.767	83.9196	2716.36	21.8876	58.0431	2704.57	37.3303	58.0775	2868.98	145.581	60.4401		0.186061
C4bim	NTf2	2309.16	2198.94	76.0295	2355.52	2344.38	77.2913	4193.89	7682.48	115.831	2309.64	2167.13	75.8353	2320.29	2231.79	76.3413	2483.64	2727.4	80.6164		0.15044
C4bim	OTf	2309.16	239.692	57.8632	2355.52	318.974	58.9592	4193.89	3218	91.0655	2309.64	223.122	57.7495	2320.29	257.468	58.1292	2483.64	528.183	61.8304		0.170991
C4bim	EtSO4	2309.16	202.828	57.6184	2355.52	250.52	58.4723	4193.89	2489.89	87.0756	2309.64	190.879	57.6194	2320.29	216.344	57.8533	2483.64	390.159	60.8276		0.188971
C4bim	OcSO4	2309.16	2902.8	84.1387	2355.52	2969.82	84.8412	4193.89	5869.92	110.397	2309.64	2889.07	84.1665	2320.29	2921.75	84.3267	2483.64	3160.72	86.8101		0.187408
C4bim	FAP	2309.16	7710.19	108.692	2355.52	7982.73	110.168	4193.89	15722	148.391	2309.64	7658.76	108.457	2320.29	7758.54	108.972	2483.64	8641.58	113.785		0.132417
C4bim	Phosph	2309.16	7322.91	112.007	2355.52	7392.66	112.554	4193.89	10643.6	134.923	2309.64	7333.31	112.165	2320.29	7342.23	112.156	2483.64	7597.83	114.127		0.186184
C4bim	Cl	2309.16	3.4225	55.3314	2355.52	9.9856	55.839	4193.89	1256.7	79.0816	2309.64	1	55.3534	2320.29	9	55.4887	2483.64	49	57.3847		0.205552
C4bim	BF4	2309.16	51.8634	55.8784	2355.52	111.107	56.8466	4193.89	1604.48	81.3269	2309.64	43.6333	55.848	2320.29	63.241	56.0892	2483.64	248.388	59.203		0.188748
C4bim	PF6	2309.16	125.135	56.6099	2355.52	211.514	57.7914	4193.89	3223.46	90.8534	2309.64	111.678	56.5243	2320.29	142.086	56.8771	2483.64	430.419	60.7865		0.168675
C4bim	CH3COO	2309.16	31.523	55.6645	2355.52	57.9959	56.3443	4193.89	821.689	76.3393	2309.64	25.3247	55.6956	2320.29	37.3303	55.8211	2483.64	125.15	58.1206		0.207548
C4bim	DCA	2309.16	81.3496	56.3149	2355.52	108.877	56.9977	4193.89	944.679	77.295	2309.64	68.6945	56.2406	2320.29	88.2503	56.4801	2483.64	1.74788	56.9743		0.281661
C4bim	C(CN)3	2309.16	222.768	57.8087	2355.52	257.604	58.5299	4193.89	1367.68	80.1686	2309.64	204.403	57.6802	2320.29	231.512	57.9828	2483.64	342.682	60.3904		0.206613
C4bim	Ser	2309.16	202.374	57.5846	2355.52	249.897	58.4146	4193.89	1581.96	81.4506	2309.64	190.937	57.5587	2320.29	213.116	57.7754	2483.64	366.464	60.5392		0.194907
C4bim	Tau	2309.16	202.649	57.6209	2355.52	249.518	58.4501	4193.89	2432.11	86.732	2309.64	191.306	57.6108	2320.29	216.344	57.8533	2483.64	382.727	60.7371		0.189691
C4bim	Lys	2309.16	908.61	65.3605	2355.52	962.631	66.1451	4193.89	2643.91	89.1807	2309.64	898.772	65.3758	2320.29	921.417	65.5439	2483.64	1097.47	68.1762		0.193296
C4bim	Thr	2309.16	302.156	58.6279	2355.52	352.483	59.4707	4193.89	1820.55	83.0448	2309.64	291.004	58.6259	2320.29	313.63	58.8218	2483.64	477.559	61.636		0.193209
C4bim	Pro	2309.16	274.927	58.4167	2355.52	318.299	59.2067	4193.89	1680.22	82.2112	2309.64	261.498	58.3866	2320.29	284.99	58.6003	2483.64	428.649	61.2617		0.197988
C4bim	Val	2309.16	303.597	58.6388	2355.52	346.745	59.4259	4193.89	1707.11	82.3692	2309.64	296.591	58.6941	2320.29	313.63	58.8218	2483.64	456.551	61.4736		0.196216
C4bim	NPf2	2309.16	6658.66	106.369	2355.52	6866.13	107.565	4193.89	13684.8	143.769	2309.64	6613.98	106.165	2320.29	6701.95	106.64	2483.64	7395.25	110.666		0.147568
C4bim	MeOHPO2	2309.16	55.565	55.9184	2355.52	90.1336	56.664	4193.89	1904.8	83.2141	2309.64	47.9123	55.9375	2320.29	66.7219	56.1338	2483.64	191.421	58.7282		0.196033
C4bim	Cys	2309.16	204.091	57.5973	2355.52	243.957	58.3702	4193.89	2342.92	86.0621	2309.64	190.937	57.5587	2320.29	218.17	57.8187	2483.64	366.464	60.5392		0.188152
C4bim	MeSO4	2309.16	107.281	56.5035	2355.52	152.556	57.3455	4193.89	2269.5	85.5215	2309.64	95.9101	56.4978	2320.29	120.152	56.7362	2483.64	285.017	59.6657		0.189877
C4bim	DMP	2309.16	187.969	57.3766	2355.52	233.047	58.2164	4193.89	2405.3	86.5149	2309.64	178.846	57.4195	2320.29	201.033	57.6108	2483.64	363.453	60.5062		0.191619
C4bim	NO3	2309.16	29.486	55.6441	2355.52	66.1359	56.4159	4193.89	985.608	77.4047	2309.64	21.583	55.6147	2320.29	37.3303	55.8211	2483.64	154.43	58.3695		0.201704
C4bim	NO2	2309.16	13.5392	55.4645	2355.52	40.3355	56.1509	4193.89	715.704	75.614	2309.64	7.4641	55.4527	2320.29	19.3808	55.6237	2483.64	104.445	57.9051		0.208485
C4bim	SCN	2309.16	16.2447	55.4892	2355.52	29.805	56.0572	4193.89	1375.96	79.8637	2309.64	7.4641	55.4527	2320.29	24.3725	55.6687	2483.64	84.4425	57.7321		0.204742
C4bim	BrO3	2309.16	30.5918	55.6581	2355.52	65.6901	56.4116	4193.89	7161.03	110.359	2309.64	21.583	55.6147	2320.29	46.6333	55.9285	2483.64	177.558	58.5747		0.221011
C4bim	IO3	2309.16	31.1467	55.6655	2355.52	64.1033	56.3967	4193.89	16878.2	147.982	2309.64	21.583	55.6147	2320.29	53.7951	56.0089	2483.64	177.558	58.5747		0.382422
C4bim	HCO3	2309.16	30.2022	55.653	2355.52	63.5545	56.3916	4193.89	933.767	77.0678	2309.64	21.8876	55.6237	2320.29	37.3303	55.8211	2483.64	145.581	58.2924		0.202994
N8,8,8,1	NTf2	32521.1	2198.94	207.093	32604.4	2344.38	207.653	36072.2	7682.48	228.701	32554.9	2167.13	207.099	32540.6	2231.79	207.229	32844	2727.4	209.194		0.151027
N8,8,8,1	OTf	32521.1	239.692	201.135	32604.4	318.974	201.549	36072.2	3218	217.21	32554.9	223.122	201.182	32540.6	257.468	201.234	32844	528.183	202.697		0.158587
N8,8,8,1	EtSO4	32521.1	202.828	201.065	32604.4	250.52	201.407	36072.2	2489.89	215.567	32554.9	190.879	201.144	32540.6	216.344	201.154	32844	390.159	202.393		0.168087
N8,8,8,1	OcSO4	32521.1	2902.8	210.206	32604.4	2969.82	210.58	36072.2	5869.92	225.997	32554.9	2889.07	210.293	32540.6	2921.75	210.302	32844	3160.72	211.658		0.161348
N8,8,8,1	FAP	32521.1	7710.19	221.181	32604.4	7982.73	221.997	36072.2	15722	246.793	32554.9	7658.76	221.138	32540.6	7758.54	221.339	32844	8641.58	224.076		0.127952
N8,8,8,1	Phosph	32521.1	7322.91	222.829	32604.4	7392.66	223.191	36072.2	10643.6	238.938	32554.9	7333.31	222.98	32540.6	7342.23	222.924	32844	7597.83	224.25		0.152712
N8,8,8,1	Cl	32521.1	3.4225	200.421	32604.4	9.9856	200.658	36072.2	1256.7	212.464	32554.9	1	200.507	32540.6	9	200.487	32844	49	201.385		0.181429
N8,8,8,1	BF4	32521.1	51.8634	200.573	32604.4	111.107	200.941	36072.2	1604.48	213.31	32554.9	43.6333	200.644	32540.6	63.241	200.654	32844	248.388	201.911		0.154241
N8,8,8,1	PF6	32521.1	125.135	200.778	32604.4	211.514	201.21	36072.2	3223.46	217.121	32554.9	111.678	200.833	32540.6	142.086	200.876	32844	430.419	202.381		0.159516
N8,8,8,1	CH3COO	32521.1	31.523	200.513	32604.4	57.9959	200.8	36072.2	821.689	211.459	32554.9	25.3247	200.602	32540.6	37.3303	200.579	32844	125.15	201.596		0.164382
N8,8,8,1	DCA	32521.1	81.3496	200.695	32604.4	108.877	200.984	36072.2	944.679	211.806	32554.9	68.6945	200.754	32540.6	88.2503	200.764	32844	1.74788	201.269		0.278111
N8,8,8,1	C(CN)3	32521.1	222.768	201.119	32604.4	257.604	201.424	36072.2	1367.68	212.871	32554.9	204.403	201.162	32540.6	231.512	201.191	32844	342.682	202.262		0.171754
N8,8,8,1	Ser	32521.1	202.374	201.055	32604.4	249.897	201.39	36072.2	1581.96	213.357	32554.9	190.937	201.127	32540.6	213.116	201.132	32844	366.464	202.307		0.158542
N8,8,8,1	Tau	32521.1	202.649	201.065	32604.4	249.518	201.401	36072.2	2432.11	215.429	32554.9	191.306	201.142	32540.6	216.344	201.154	32844	382.727	202.366		0.168829
N8,8,8,1	Lys	32521.1	908.61	203.419	32604.4	962.631	203.767	36072.2	2643.91	216.426	32554.9	898.772	203.502	32540.6	921.417	203.499	32844	1097.47	204.722		0.158095
N8,8,8,1	Thr	32521.1	302.156	201.356	32604.4	352.483	201.699	36072.2	1820.55	213.971	32554.9	291.004	201.435	32540.6	313.63	201.435	32844	477.559	202.638		0.1579
N8,8,8,1	Pro	32521.1	274.927	201.295	32604.4	318.299	201.621	36072.2	1680.22	213.649	32554.9	261.498	201.365	32540.6	284.99	201.37	32844	428.649	202.524		0.163541
N8,8,8,1	Val	32521.1	303.597	201.359	32604.4	346.745	201.686	36072.2	1707.11	213.71	32554.9	296.591	201.455	32540.6	313.63	201.435	32844	456.551	202.588		0.15966
N8,8,8,1	NPf2	32521.1	6658.66	220.049	32604.4	6866.13	220.717	36072.2	13684.8	244.042	32554.9	6613.98	220.023	32540.6	6701.95	220.2	32844	7395.25	222.508		0.14099
N8,8,8,1	MeOHPO2	32521.1	55.565	200.584	32604.4	90.1336	200.89	36072.2	1904.8	214.037	32554.9	47.9123	200.669	32540.6	66.7219	200.666	32844	191.421	201.772		0.171986
N8,8,8,1	Cys	32521.1	204.091	201.059	32604.4	243.957	201.377	36072.2	2342.92	215.16	32554.9	190.937	201.127	32540.6	218.17	201.144	32844	366.464	202.307		0.168388
N8,8,8,1	MeSO4	32521.1	107.281	200.748	32604.4	152.556	201.083	36072.2	2269.5	214.944	32554.9	95.9101	200.826	32540.6	120.152	200.836	32844	285.017	202.047		0.168002
N8,8,8,1	DMP	32521.1	187.969	200.995	32604.4	233.047	201.333	36072.2	2405.3	215.341	32554.9	178.846	201.087	32540.6	201.033	201.085	32844	363.453	202.297		0.169402
N8,8,8,1	NO3	32521.1	29.486	200.508	32604.4	66.1359	200.82	36072.2	985.608	211.846	32554.9	21.583	200.579	32540.6	37.3303	200.579	32844	154.43	201.668		0.159541
N8,8,8,1	NO2	32521.1	13.5392	200.458	32604.4	40.3355	200.745	36072.2	715.704	211.198	32554.9	7.4641	200.534	32540.6	19.3808	200.524	32844	104.445	201.534		0.163496
N8,8,8,1	SCN	32521.1	16.2447	200.465	32604.4	29.805	200.719	36072.2	1375.96	212.756	32554.9	7.4641	200.534	32540.6	24.3725	200.537	32844	84.4425	201.484		0.17918
N8,8,8,1	BrO3	32521.1	30.5918	200.512	32604.4	65.6901	200.818	36072.2	7161.03	225.979	32554.9	21.583	200.579	32540.6	46.6333	200.609	32844	177.558	201.728		0.317017
N8,8,8,1	IO3	32521.1	31.1467	200.514	32604.4	64.1033	200.814	36072.2	16878.2	246.548	32554.9	21.583	200.579	32540.6	53.7951	200.632	32844	177.558	201.728		0.609318
N8,8,8,1	HCO3	32521.1	30.2022	200.51	32604.4	63.5545	200.813	36072.2	933.767	211.723	32554.9	21.8876	200.582	32540.6	37.3303	200.579	32844	145.581	201.646		0.161316
N4,4,4,1	NTf2	2691	2198.94	77.6706	2737.2	2344.38	78.9032	4659.61	7682.48	117.291	2716.36	2167.13	77.6273	2701.91	2231.79	77.9744	2868.98	2727.4	82.1827		0.150304
N4,4,4,1	OTf	2691	239.692	60.0032	2737.2	318.974	61.057	4659.61	3218	92.9146	2716.36	223.122	60.0833	2701.91	257.468	60.2578	2868.98	528.183	63.8592		0.171626
N4,4,4,1	EtSO4	2691	202.828	59.7672	2737.2	250.52	60.5869	4659.61	2489.89	89.0077	2716.36	190.879	59.9583	2701.91	216.344	59.9917	2868.98	390.159	62.8888		0.189414
N4,4,4,1	OcSO4	2691	2902.8	85.6245	2737.2	2969.82	86.3121	4659.61	5869.92	111.928	2716.36	2889.07	85.7846	2701.91	2921.75	85.8079	2868.98	3160.72	88.2666		0.186359
N4,4,4,1	FAP	2691	7710.19	109.846	2737.2	7982.73	111.305	4659.61	15722	149.533	2716.36	7658.76	109.718	2701.91	7758.54	110.123	2868.98	8641.58	114.9		0.13117
N4,4,4,1	Phosph	2691	7322.91	113.127	2737.2	7392.66	113.667	4659.61	10643.6	136.178	2716.36	7333.31	113.384	2701.91	7342.23	113.274	2868.98	7597.83	115.239		0.184261
N4,4,4,1	Cl	2691	3.4225	57.5655	2737.2	9.9856	58.0496	4659.61	1256.7	81.2041	2716.36	1	57.7841	2701.91	9	57.7148	2868.98	49	59.5651		0.206343
N4,4,4,1	BF4	2691	51.8634	58.0915	2737.2	111.107	59.0195	4659.61	1604.48	83.3922	2716.36	43.6333	58.258	2701.91	63.241	58.2924	2868.98	248.388	61.3188		0.188902
N4,4,4,1	PF6	2691	125.135	58.7955	2737.2	211.514	59.9301	4659.61	3223.46	92.7068	2716.36	111.678	58.9067	2701.91	142.086	59.0508	2868.98	430.419	62.849		0.16949
N4,4,4,1	CH3COO	2691	31.523	57.8858	2737.2	57.9959	58.5359	4659.61	821.689	78.5359	2716.36	25.3247	58.112	2701.91	37.3303	58.0345	2868.98	125.15	60.2744		0.207487
N4,4,4,1	DCA	2691	81.3496	58.5115	2737.2	108.877	59.1651	4659.61	944.679	79.4652	2716.36	68.6945	58.6345	2701.91	88.2503	58.6686	2868.98	1.74788	59.1698		0.283551
N4,4,4,1	C(CN)3	2691	222.768	59.9506	2737.2	257.604	60.6425	4659.61	1367.68	82.263	2716.36	204.403	60.0167	2701.91	231.512	60.1166	2868.98	342.682	62.466		0.206747
N4,4,4,1	Ser	2691	202.374	59.7346	2737.2	249.897	60.5312	4659.61	1581.96	83.5129	2716.36	190.937	59.8999	2701.91	213.116	59.9166	2868.98	366.464	62.6099		0.194912
N4,4,4,1	Tau	2691	202.649	59.7696	2737.2	249.518	60.5655	4659.61	2432.11	88.6716	2716.36	191.306	59.95	2701.91	216.344	59.9917	2868.98	382.727	62.8013		0.190155
N4,4,4,1	Lys	2691	908.61	67.2624	2737.2	962.631	68.0216	4659.61	2643.91	91.0681	2716.36	898.772	67.4463	2701.91	921.417	67.4389	2868.98	1097.47	70.0214		0.192835
N4,4,4,1	Thr	2691	302.156	60.7409	2737.2	352.483	61.551	4659.61	1820.55	85.0685	2716.36	291.004	60.9262	2701.91	313.63	60.9262	2868.98	477.559	63.671		0.193162
N4,4,4,1	Pro	2691	274.927	60.5371	2737.2	318.299	61.296	4659.61	1680.22	84.2549	2716.36	261.498	60.696	2701.91	284.99	60.7124	2868.98	428.649	63.3088		0.198025
N4,4,4,1	Val	2691	303.597	60.7515	2737.2	346.745	61.5077	4659.61	1707.11	84.409	2716.36	296.591	60.9918	2701.91	313.63	60.9262	2868.98	456.551	63.5138		0.196128
N4,4,4,1	NPf2	2691	6658.66	107.548	2737.2	6866.13	108.729	4659.61	13684.8	144.947	2716.36	6613.98	107.452	2701.91	6701.95	107.815	2868.98	7395.25	111.812		0.146329
N4,4,4,1	MeOHPO2	2691	55.565	58.13	2737.2	90.1336	58.8436	4659.61	1904.8	85.2337	2716.36	47.9123	58.3438	2701.91	66.7219	58.3352	2868.98	191.421	60.8605		0.196573
N4,4,4,1	Cys	2691	204.091	59.7468	2737.2	243.957	60.4884	4659.61	2342.92	88.0164	2716.36	190.937	59.8999	2701.91	218.17	59.9583	2868.98	366.464	62.6099		0.188711
N4,4,4,1	MeSO4	2691	107.281	58.693	2737.2	152.556	59.5001	4659.61	2269.5	87.4879	2716.36	95.9101	58.8812	2701.91	120.152	58.9152	2868.98	285.017	61.7657		0.190382
N4,4,4,1	DMP	2691	187.969	59.534	2737.2	233.047	60.34	4659.61	2405.3	88.4592	2716.36	178.846	59.7662	2701.91	201.033	59.7578	2868.98	363.453	62.578		0.192026
N4,4,4,1	NO3	2691	29.486	57.8662	2737.2	66.1359	58.6047	4659.61	985.608	79.5719	2716.36	21.583	58.0345	2701.91	37.3303	58.0345	2868.98	154.43	60.5145		0.201661
N4,4,4,1	NO2	2691	13.5392	57.6935	2737.2	40.3355	58.3497	4659.61	715.704	77.8311	2716.36	7.4641	57.8792	2701.91	19.3808	57.8446	2868.98	104.445	60.0666		0.208373
N4,4,4,1	SCN	2691	16.2447	57.7173	2737.2	29.805	58.2595	4659.61	1375.96	81.9659	2716.36	7.4641	57.8792	2701.91	24.3725	57.8878	2868.98	84.4425	59.8999		0.205417
N4,4,4,1	BrO3	2691	30.5918	57.8796	2737.2	65.6901	58.6007	4659.61	7161.03	111.89	2716.36	21.583	58.0345	2701.91	46.6333	58.1378	2868.98	177.558	60.7124		0.225225
N4,4,4,1	IO3	2691	31.1467	57.8867	2737.2	64.1033	58.5863	4659.61	16878.2	149.128	2716.36	21.583	58.0345	2701.91	53.7951	58.2151	2868.98	177.558	60.7124		0.389152
N4,4,4,1	HCO3	2691	30.2022	57.8748	2737.2	63.5545	58.5814	4659.61	933.767	79.2442	2716.36	21.8876	58.0431	2701.91	37.3303	58.0345	2868.98	145.581	60.4401		0.20299
P4,4,4,4	NTf2	4840.82	2198.94	91.9663	4892.59	2344.38	93.031	7659.9	7682.48	131.783	4868.89	2167.13	91.9348	4855.49	2231.79	92.2551	5053.85	2727.4	96		0.153116
P4,4,4,4	OTf	4840.82	239.692	77.6238	4892.59	318.974	78.4667	7659.9	3218	110.647	4868.89	223.122	77.6917	4855.49	257.468	77.8588	5053.85	528.183	80.8703		0.169702
P4,4,4,4	EtSO4	4840.82	202.828	77.4415	4892.59	250.52	78.1014	7659.9	2489.89	107.387	4868.89	190.879	77.5951	4855.49	216.344	77.6531	5053.85	390.159	80.1062		0.185298
P4,4,4,4	OcSO4	4840.82	2902.8	98.7757	4892.59	2969.82	99.3924	7659.9	5869.92	127.033	4868.89	2889.07	98.9192	4855.49	2921.75	98.9646	5053.85	3160.72	101.257		0.183887
P4,4,4,4	FAP	4840.82	7710.19	120.38	4892.59	7982.73	121.728	7659.9	15722	161.151	4868.89	7658.76	120.266	4855.49	7758.54	120.657	5053.85	8641.58	125.156		0.135622
P4,4,4,4	Phosph	4840.82	7322.91	123.381	4892.59	7392.66	123.892	7659.9	10643.6	148.842	4868.89	7333.31	123.62	4855.49	7342.23	123.539	5053.85	7597.83	125.467		0.182903
P4,4,4,4	Cl	4840.82	3.4225	75.7553	4892.59	9.9856	76.15	7659.9	1256.7	101.013	4868.89	1	75.9276	4855.49	9	75.9078	5053.85	49	77.5242		0.201416
P4,4,4,4	BF4	4840.82	51.8634	76.1558	4892.59	111.107	76.8919	7659.9	1604.48	102.781	4868.89	43.6333	76.2889	4855.49	63.241	76.3479	5053.85	248.388	78.8797		0.180789
P4,4,4,4	PF6	4840.82	125.135	76.6942	4892.59	211.514	77.593	7659.9	3223.46	110.472	4868.89	111.678	76.7854	4855.49	142.086	76.9285	5053.85	430.419	80.075		0.168273
P4,4,4,4	CH3COO	4840.82	31.523	75.999	4892.59	57.9959	76.5213	7659.9	821.689	98.8811	4868.89	25.3247	76.1774	4855.49	37.3303	76.1512	5053.85	125.15	78.0705		0.19675
P4,4,4,4	DCA	4840.82	81.3496	76.4767	4892.59	108.877	77.0037	7659.9	944.679	99.6208	4868.89	68.6945	76.5768	4855.49	88.2503	76.6355	5053.85	1.74788	77.2209		0.285192
P4,4,4,4	C(CN)3	4840.82	222.768	77.5832	4892.59	257.604	78.1446	7659.9	1367.68	101.866	4868.89	204.403	77.6402	4855.49	231.512	77.7496	5053.85	342.682	79.7747		0.198866
P4,4,4,4	Ser	4840.82	202.374	77.4164	4892.59	249.897	78.0582	7659.9	1581.96	102.878	4868.89	190.937	77.55	4855.49	213.116	77.5951	5053.85	366.464	79.8874		0.186528
P4,4,4,4	Tau	4840.82	202.649	77.4434	4892.59	249.518	78.0848	7659.9	2432.11	107.108	4868.89	191.306	77.5887	4855.49	216.344	77.6531	5053.85	382.727	80.0375		0.186075
P4,4,4,4	Lys	4840.82	908.61	83.3625	4892.59	962.631	84	7659.9	2643.91	109.101	4868.89	898.772	83.5165	4855.49	921.417	83.5404	5053.85	1097.47	85.8196		0.18585
P4,4,4,4	Thr	4840.82	302.156	78.1955	4892.59	352.483	78.8517	7659.9	1820.55	104.145	4868.89	291.004	78.3454	4855.49	313.63	78.3773	5053.85	477.559	80.7217		0.185227
P4,4,4,4	Pro	4840.82	274.927	78.0373	4892.59	318.299	78.6528	7659.9	1680.22	103.482	4868.89	261.498	78.1665	4855.49	284.99	78.2113	5053.85	428.649	80.4363		0.190331
P4,4,4,4	Val	4840.82	303.597	78.2037	4892.59	346.745	78.8179	7659.9	1707.11	103.607	4868.89	296.591	78.3964	4855.49	313.63	78.3773	5053.85	456.551	80.5978		0.187829
P4,4,4,4	NPf2	4840.82	6658.66	118.286	4892.59	6866.13	119.378	7659.9	13684.8	156.905	4868.89	6613.98	118.203	4855.49	6701.95	118.554	5053.85	7395.25	122.327		0.150131
P4,4,4,4	MeOHPO2	4840.82	55.565	76.1852	4892.59	90.1336	76.757	7659.9	1904.8	104.28	4868.89	47.9123	76.3544	4855.49	66.7219	76.3806	5053.85	191.421	78.5239		0.191477
P4,4,4,4	Cys	4840.82	204.091	77.4259	4892.59	243.957	78.0251	7659.9	2342.92	106.567	4868.89	190.937	77.55	4855.49	218.17	77.6273	5053.85	366.464	79.8874		0.185018
P4,4,4,4	MeSO4	4840.82	107.281	76.6156	4892.59	152.556	77.2614	7659.9	2269.5	106.131	4868.89	95.9101	76.7659	4855.49	120.152	76.8245	5053.85	285.017	79.2275		0.185872
P4,4,4,4	DMP	4840.82	187.969	77.2618	4892.59	233.047	77.91	7659.9	2405.3	106.933	4868.89	178.846	77.4468	4855.49	201.033	77.4726	5053.85	363.453	79.8624		0.187498
P4,4,4,4	NO3	4840.82	29.486	75.9841	4892.59	66.1359	76.574	7659.9	985.608	99.7059	4868.89	21.583	76.1183	4855.49	37.3303	76.1512	5053.85	154.43	78.256		0.191241
P4,4,4,4	NO2	4840.82	13.5392	75.8526	4892.59	40.3355	76.379	7659.9	715.704	98.3222	4868.89	7.4641	76	4855.49	19.3808	76.0066	5053.85	104.445	77.9102		0.19703
P4,4,4,4	SCN	4840.82	16.2447	75.8707	4892.59	29.805	76.3101	7659.9	1375.96	101.627	4868.89	7.4641	76	4855.49	24.3725	76.0395	5053.85	84.4425	77.7817		0.200016
P4,4,4,4	BrO3	4840.82	30.5918	75.9943	4892.59	65.6901	76.5709	7659.9	7161.03	127	4868.89	21.583	76.1183	4855.49	46.6333	76.2299	5053.85	177.558	78.4092		0.250598
P4,4,4,4	IO3	4840.82	31.1467	75.9997	4892.59	64.1033	76.5599	7659.9	16878.2	160.775	4868.89	21.583	76.1183	4855.49	53.7951	76.2889	5053.85	177.558	78.4092		0.439419
P4,4,4,4	HCO3	4840.82	30.2022	75.9906	4892.59	63.5545	76.5561	7659.9	933.767	99.4446	4868.89	21.8876	76.1249	4855.49	37.3303	76.1512	5053.85	145.581	78.1985		0.192726
N4,1,1,1	NTf2	363.411	2198.94	56.5799	391.681	2344.38	58.0921	1533.99	7682.48	100.398	383.441	2167.13	56.4801	370.145	2231.79	56.9561	471.126	2727.4	62.0161		0.156862
N4,1,1,1	OTf	363.411	239.692	27.7298	391.681	318.974	29.6132	1533.99	3218	70.3966	383.441	223.122	27.8209	370.145	257.468	28.1957	471.126	528.183	34.2053		0.198912
N4,1,1,1	EtSO4	363.411	202.828	27.2153	391.681	250.52	28.6314	1533.99	2489.89	65.1531	383.441	190.879	27.55	370.145	216.344	27.6225	471.126	390.159	32.3574		0.216402
N4,1,1,1	OcSO4	363.411	2902.8	67.0829	391.681	2969.82	67.8142	1533.99	5869.92	94.0764	383.441	2889.07	67.2533	370.145	2921.75	67.283	471.126	3160.72	69.8785		0.197705
N4,1,1,1	FAP	363.411	7710.19	96.0978	391.681	7982.73	97.6611	1533.99	15722	136.684	383.441	7658.76	95.9271	370.145	7758.54	96.3898	471.126	8641.58	101.459		0.137786
N4,1,1,1	Phosph	363.411	7322.91	99.8314	391.681	7392.66	100.346	1533.99	10643.6	121.93	383.441	7333.31	100.1	370.145	7342.23	99.975	471.126	7597.83	101.843		0.197599
N4,1,1,1	Cl	363.411	3.4225	21.9625	391.681	9.9856	22.776	1533.99	1256.7	54.0061	383.441	1	22.4277	370.145	9	22.2486	471.126	49	25.2982		0.221433
N4,1,1,1	BF4	363.411	51.8634	23.3062	391.681	111.107	25.1452	1533.99	1604.48	57.2435	383.441	43.6333	23.622	370.145	63.241	23.7065	471.126	248.388	29.189		0.225463
N4,1,1,1	PF6	363.411	125.135	25.0095	391.681	211.514	27.2139	1533.99	3223.46	70.122	383.441	111.678	25.1794	370.145	142.086	25.5147	471.126	430.419	32.28		0.202938
N4,1,1,1	CH3COO	363.411	31.523	22.7888	391.681	57.9959	23.9881	1533.99	821.689	49.9043	383.441	25.3247	23.2594	370.145	37.3303	23.0651	471.126	125.15	26.9258		0.237622
N4,1,1,1	DCA	363.411	81.3496	24.3343	391.681	108.877	25.4851	1533.99	944.679	51.3545	383.441	68.6945	24.5357	370.145	88.2503	24.6171	471.126	1.74788	24.353		0.244098
N4,1,1,1	C(CN)3	363.411	222.768	27.6159	391.681	257.604	28.7488	1533.99	1367.68	55.5856	383.441	204.403	27.6767	370.145	231.512	27.8927	471.126	342.682	31.5278		0.224573
N4,1,1,1	Ser	363.411	202.374	27.1437	391.681	249.897	28.5133	1533.99	1581.96	57.4192	383.441	190.937	27.4226	370.145	213.116	27.4591	471.126	366.464	31.8119		0.220847
N4,1,1,1	Tau	363.411	202.649	27.2206	391.681	249.518	28.5861	1533.99	2432.11	64.6932	383.441	191.306	27.5318	370.145	216.344	27.6225	471.126	382.727	32.187		0.215828
N4,1,1,1	Lys	363.411	908.61	41.1435	391.681	962.631	42.1417	1533.99	2643.91	67.9409	383.441	898.772	41.3884	370.145	921.417	41.3763	471.126	1097.47	44.6654		0.209057
N4,1,1,1	Thr	363.411	302.156	29.292	391.681	352.483	30.6188	1533.99	1820.55	59.659	383.441	291.004	29.5973	370.145	313.63	29.5973	471.126	477.559	33.8526		0.217043
N4,1,1,1	Pro	363.411	274.927	28.8669	391.681	318.299	30.1028	1533.99	1680.22	58.4931	383.441	261.498	29.1204	370.145	284.99	29.1548	471.126	428.649	33.1662		0.21918
N4,1,1,1	Val	363.411	303.597	29.3138	391.681	346.745	30.5316	1533.99	1707.11	58.7149	383.441	296.591	29.7321	370.145	313.63	29.5973	471.126	456.551	33.5559		0.219677
N4,1,1,1	NPf2	363.411	6658.66	93.4615	391.681	6866.13	94.7157	1533.99	13684.8	131.652	383.441	6613.98	93.3274	370.145	6701.95	93.7443	471.126	7395.25	97.949		0.153292
N4,1,1,1	MeOHPO2	363.411	55.565	23.4021	391.681	90.1336	24.7297	1533.99	1904.8	59.8944	383.441	47.9123	23.8328	370.145	66.7219	23.8118	471.126	191.421	28.2135		0.228022
N4,1,1,1	Cys	363.411	204.091	27.1706	391.681	243.957	28.4224	1533.99	2342.92	63.7922	383.441	190.937	27.4226	370.145	218.17	27.55	471.126	366.464	31.8119		0.210315
N4,1,1,1	MeSO4	363.411	107.281	24.7676	391.681	152.556	26.2536	1533.99	2269.5	63.061	383.441	95.9101	25.1197	370.145	120.152	25.1992	471.126	285.017	30.1164		0.222617
N4,1,1,1	DMP	363.411	187.969	26.6994	391.681	233.047	28.1051	1533.99	2405.3	64.4017	383.441	178.846	27.1293	370.145	201.033	27.1109	471.126	363.453	31.749		0.221037
N4,1,1,1	NO3	363.411	29.486	22.739	391.681	66.1359	24.1558	1533.99	985.608	51.5193	383.441	21.583	23.0651	370.145	37.3303	23.0651	471.126	154.43	27.4591		0.235099
N4,1,1,1	NO2	363.411	13.5392	22.2957	391.681	40.3355	23.5301	1533.99	715.704	48.7877	383.441	7.4641	22.6716	370.145	19.3808	22.5832	471.126	104.445	26.4575		0.239933
N4,1,1,1	SCN	363.411	16.2447	22.3572	391.681	29.805	23.3058	1533.99	1375.96	55.145	383.441	7.4641	22.6716	370.145	24.3725	22.6936	471.126	84.4425	26.0768		0.226135
N4,1,1,1	BrO3	363.411	30.5918	22.7731	391.681	65.6901	24.1458	1533.99	7161.03	94.0318	383.441	21.583	23.0651	370.145	46.6333	23.3238	471.126	177.558	27.8927		0.215232
N4,1,1,1	IO3	363.411	31.1467	22.7911	391.681	64.1033	24.1109	1533.99	16878.2	136.241	383.441	21.583	23.0651	370.145	53.7951	23.516	471.126	177.558	27.8927		0.365916
N4,1,1,1	HCO3	363.411	30.2022	22.7607	391.681	63.5545	24.099	1533.99	933.767	51.0118	383.441	21.8876	23.0868	370.145	37.3303	23.0651	471.126	145.581	27.2947		0.233738
N4COOH,1,1,1	NTf2	849.224	2198.94	62.1707	898.686	2344.38	63.7053	2528.65	7682.48	106.074	847.555	2167.13	61.9839	860.773	2231.79	62.546	1026.37	2727.4	67.6609		0.158863
N4COOH,1,1,1	OTf	849.224	239.692	37.8531	898.686	318.974	39.5045	2528.65	3218	78.2795	847.555	223.122	37.7624	860.773	257.468	38.2492	1026.37	528.183	43.6119		0.186571
N4COOH,1,1,1	EtSO4	849.224	202.828	37.4779	898.686	250.52	38.774	2528.65	2489.89	73.5998	847.555	190.879	37.5633	860.773	216.344	37.8286	1026.37	390.159	42.1782		0.204325
N4COOH,1,1,1	OcSO4	849.224	2902.8	71.8612	898.686	2969.82	72.6804	2528.65	5869.92	100.112	847.555	2889.07	71.9375	860.773	2921.75	72.0763	1026.37	3160.72	74.9333		0.19752
N4COOH,1,1,1	FAP	849.224	7710.19	99.4922	898.686	7982.73	101.101	2528.65	15722	140.906	847.555	7658.76	99.2673	860.773	7758.54	99.7948	1026.37	8641.58	105.005		0.140497
N4COOH,1,1,1	Phosph	849.224	7322.91	103.103	898.686	7392.66	103.696	2528.65	10643.6	126.645	847.555	7333.31	103.305	860.773	7342.23	103.262	1026.37	7597.83	105.376		0.197537
N4COOH,1,1,1	Cl	849.224	3.4225	33.8566	898.686	9.9856	34.6758	2528.65	1256.7	63.9427	847.555	1	33.9853	860.773	9	34.1028	1026.37	49	37.0405		0.213664
N4COOH,1,1,1	BF4	849.224	51.8634	34.7434	898.686	111.107	36.276	2528.65	1604.48	66.6995	847.555	43.6333	34.7851	860.773	63.241	35.0714	1026.37	248.388	39.7995		0.206946
N4COOH,1,1,1	PF6	849.224	125.135	35.9081	898.686	211.514	37.7394	2528.65	3223.46	78.0327	847.555	111.678	35.8608	860.773	142.086	36.318	1026.37	430.419	42.1189		0.185405
N4COOH,1,1,1	CH3COO	849.224	31.523	34.3984	898.686	57.9959	35.4838	2528.65	821.689	60.5181	847.555	25.3247	34.5398	860.773	37.3303	34.641	1026.37	125.15	38.1707		0.223351
N4COOH,1,1,1	DCA	849.224	81.3496	35.4412	898.686	108.877	36.5124	2528.65	944.679	61.7194	847.555	68.6945	35.4119	860.773	88.2503	35.6931	1026.37	1.74788	36.4015		0.268049
N4COOH,1,1,1	C(CN)3	849.224	222.768	37.7698	898.686	257.604	38.8608	2528.65	1367.68	65.2822	847.555	204.403	37.6563	860.773	231.512	38.0263	1026.37	342.682	41.5452		0.218354
N4COOH,1,1,1	Ser	849.224	202.374	37.4259	898.686	249.897	38.6869	2528.65	1581.96	66.8503	847.555	190.937	37.47	860.773	213.116	37.7094	1026.37	366.464	41.7612		0.210295
N4COOH,1,1,1	Tau	849.224	202.649	37.4818	898.686	249.518	38.7405	2528.65	2432.11	73.1929	847.555	191.306	37.55	860.773	216.344	37.8286	1026.37	382.727	42.0476		0.204441
N4COOH,1,1,1	Lys	849.224	908.61	48.546	898.686	962.631	49.5943	2528.65	2643.91	76.0787	847.555	898.772	48.6313	860.773	921.417	48.7852	1026.37	1097.47	52.2207		0.20574
N4COOH,1,1,1	Thr	849.224	302.156	39.012	898.686	352.483	40.2639	2528.65	1820.55	68.7837	847.555	291.004	39.0896	860.773	313.63	39.2938	1026.37	477.559	43.3359		0.20824
N4COOH,1,1,1	Pro	849.224	274.927	38.6939	898.686	318.299	39.8729	2528.65	1680.22	67.7749	847.555	261.498	38.7298	860.773	284.99	38.9615	1026.37	428.649	42.8019		0.211586
N4COOH,1,1,1	Val	849.224	303.597	39.0285	898.686	346.745	40.1976	2528.65	1707.11	67.9665	847.555	296.591	39.1918	860.773	313.63	39.2938	1026.37	456.551	43.1045		0.2111
N4COOH,1,1,1	NPf2	849.224	6658.66	96.9483	898.686	6866.13	98.2585	2528.65	13684.8	136.03	847.555	6613.98	96.7574	860.773	6701.95	97.242	1026.37	7395.25	101.617		0.155765
N4COOH,1,1,1	MeOHPO2	849.224	55.565	34.8078	898.686	90.1336	35.9892	2528.65	1904.8	68.988	847.555	47.9123	34.9285	860.773	66.7219	35.1426	1026.37	191.421	39.0896		0.211327
N4COOH,1,1,1	Cys	849.224	204.091	37.4455	898.686	243.957	38.6199	2528.65	2342.92	72.3978	847.555	190.937	37.47	860.773	218.17	37.7757	1026.37	366.464	41.7612		0.200997
N4COOH,1,1,1	MeSO4	849.224	107.281	35.7401	898.686	152.556	37.0529	2528.65	2269.5	71.7543	847.555	95.9101	35.819	860.773	120.152	36.0971	1026.37	285.017	40.4846		0.206274
N4COOH,1,1,1	DMP	849.224	187.969	37.105	898.686	233.047	38.387	2528.65	2405.3	72.9355	847.555	178.846	37.2559	860.773	201.033	37.4566	1026.37	363.453	41.7133		0.207672
N4COOH,1,1,1	NO3	849.224	29.486	34.3654	898.686	66.1359	35.5973	2528.65	985.608	61.8566	847.555	21.583	34.4093	860.773	37.3303	34.641	1026.37	154.43	38.5487		0.21874
N4COOH,1,1,1	NO2	849.224	13.5392	34.0737	898.686	40.3355	35.1758	2528.65	715.704	59.6007	847.555	7.4641	34.1467	860.773	19.3808	34.322	1026.37	104.445	37.8418		0.224742
N4COOH,1,1,1	SCN	849.224	16.2447	34.114	898.686	29.805	35.0261	2528.65	1375.96	64.9074	847.555	7.4641	34.1467	860.773	24.3725	34.3948	1026.37	84.4425	37.5766		0.215282
N4COOH,1,1,1	BrO3	849.224	30.5918	34.388	898.686	65.6901	35.5906	2528.65	7161.03	100.07	847.555	21.583	34.4093	860.773	46.6333	34.8138	1026.37	177.558	38.8587		0.211682
N4COOH,1,1,1	IO3	849.224	31.1467	34.3999	898.686	64.1033	35.5669	2528.65	16878.2	140.476	847.555	21.583	34.4093	860.773	53.7951	34.9428	1026.37	177.558	38.8587		0.361714
N4COOH,1,1,1	HCO3	849.224	30.2022	34.3798	898.686	63.5545	35.5588	2528.65	933.767	61.4345	847.555	21.8876	34.4238	860.773	37.3303	34.641	1026.37	145.581	38.4318		0.218948
C4mmim	NTf2	997.581	2198.94	63.372	1038.34	2344.38	64.8301	2627.66	7682.48	106.632	996.316	2167.13	63.1585	1007.42	2231.79	63.7338	1149.91	2727.4	68.6222		0.150698
C4mmim	OTf	997.581	239.692	39.7954	1038.34	318.974	41.2939	2627.66	3218	79.0345	996.316	223.122	39.6611	1007.42	257.468	40.1622	1149.91	528.183	45.0888		0.174991
C4mmim	EtSO4	997.581	202.828	39.4386	1038.34	250.52	40.5956	2627.66	2489.89	74.4022	996.316	190.879	39.4715	1007.42	216.344	39.7618	1149.91	390.159	43.7035		0.192875
C4mmim	OcSO4	997.581	2902.8	72.903	1038.34	2969.82	73.6683	2627.66	5869.92	100.703	996.316	2889.07	72.952	1007.42	2921.75	73.1095	1149.91	3160.72	75.8024		0.18994
C4mmim	FAP	997.581	7710.19	100.247	1038.34	7982.73	101.813	2627.66	15722	141.327	996.316	7658.76	100.005	1007.42	7758.54	100.544	1149.91	8641.58	105.627		0.133622
C4mmim	Phosph	997.581	7322.91	103.832	1038.34	7392.66	104.391	2627.66	10643.6	127.113	996.316	7333.31	104.014	1007.42	7342.23	103.986	1149.91	7597.83	105.995		0.190604
C4mmim	Cl	997.581	3.4225	36.015	1038.34	9.9856	36.7014	2627.66	1256.7	64.8647	996.316	1	36.0832	1007.42	9	36.2353	1149.91	49	38.7685		0.202804
C4mmim	BF4	997.581	51.8634	36.8498	1038.34	111.107	38.2169	2627.66	1604.48	67.5839	996.316	43.6333	36.8375	1007.42	63.241	37.1484	1149.91	248.388	41.4126		0.194968
C4mmim	PF6	997.581	125.135	37.95	1038.34	211.514	39.6086	2627.66	3223.46	78.79	996.316	111.678	37.855	1007.42	142.086	38.3275	1149.91	430.419	43.6463		0.173145
C4mmim	CH3COO	997.581	31.523	36.5248	1038.34	57.9959	37.4657	2627.66	821.689	61.4915	996.316	25.3247	36.606	1007.42	37.3303	36.7423	1149.91	125.15	39.8497		0.212086
C4mmim	DCA	997.581	81.3496	37.5085	1038.34	108.877	38.4413	2627.66	944.679	62.6741	996.316	68.6945	37.4299	1007.42	88.2503	37.7359	1149.91	1.74788	38.1585		0.260642
C4mmim	C(CN)3	997.581	222.768	39.7161	1038.34	257.604	40.6785	2627.66	1367.68	66.1855	996.316	204.403	39.5601	1007.42	231.512	39.95	1149.91	342.682	43.0929		0.20813
C4mmim	Ser	997.581	202.374	39.3892	1038.34	249.897	40.5124	2627.66	1581.96	67.7327	996.316	190.937	39.3827	1007.42	213.116	39.6485	1149.91	366.464	43.3013		0.199411
C4mmim	Tau	997.581	202.649	39.4423	1038.34	249.518	40.5636	2627.66	2432.11	73.9998	996.316	191.306	39.4588	1007.42	216.344	39.7618	1149.91	382.727	43.5775		0.193088
C4mmim	Lys	997.581	908.61	50.0751	1038.34	962.631	51.0311	2627.66	2643.91	76.8552	996.316	898.772	50.1199	1007.42	921.417	50.2991	1149.91	1097.47	53.4603		0.196702
C4mmim	Thr	997.581	302.156	40.8993	1038.34	352.483	42.0209	2627.66	1820.55	69.6417	996.316	291.004	40.9268	1007.42	313.63	41.1582	1149.91	477.559	44.8219		0.197643
C4mmim	Pro	997.581	274.927	40.5959	1038.34	318.299	41.6465	2627.66	1680.22	68.6455	996.316	261.498	40.5832	1007.42	284.99	40.8412	1149.91	428.649	44.3058		0.201161
C4mmim	Val	997.581	303.597	40.9149	1038.34	346.745	41.9574	2627.66	1707.11	68.8346	996.316	296.591	41.0244	1007.42	313.63	41.1582	1149.91	456.551	44.5982		0.200564
C4mmim	NPf2	997.581	6658.66	97.723	1038.34	6866.13	98.9915	2627.66	13684.8	136.466	996.316	6613.98	97.5141	1007.42	6701.95	98.0102	1149.91	7395.25	102.259		0.148844
C4mmim	MeOHPO2	997.581	55.565	36.9106	1038.34	90.1336	37.9448	2627.66	1904.8	69.8434	996.316	47.9123	36.973	1007.42	66.7219	37.2156	1149.91	191.421	40.7308		0.199375
C4mmim	Cys	997.581	204.091	39.4078	1038.34	243.957	40.4485	2627.66	2342.92	73.2134	996.316	190.937	39.3827	1007.42	218.17	39.7115	1149.91	366.464	43.3013		0.189927
C4mmim	MeSO4	997.581	107.281	37.791	1038.34	152.556	38.9551	2627.66	2269.5	72.5772	996.316	95.9101	37.8153	1007.42	120.152	38.1182	1149.91	285.017	42.0714		0.194299
C4mmim	DMP	997.581	187.969	39.0844	1038.34	233.047	40.2261	2627.66	2405.3	73.7451	996.316	178.846	39.1791	1007.42	201.033	39.4081	1149.91	363.453	43.2551		0.196051
C4mmim	NO3	997.581	29.486	36.4937	1038.34	66.1359	37.5732	2627.66	985.608	62.8092	996.316	21.583	36.4829	1007.42	37.3303	36.7423	1149.91	154.43	40.2119		0.207196
C4mmim	NO2	997.581	13.5392	36.2192	1038.34	40.3355	37.1741	2627.66	715.704	60.5888	996.316	7.4641	36.2353	1007.42	19.3808	36.4417	1149.91	104.445	39.5348		0.213415
C4mmim	SCN	997.581	16.2447	36.257	1038.34	29.805	37.0325	2627.66	1375.96	65.8159	996.316	7.4641	36.2353	1007.42	24.3725	36.5103	1149.91	84.4425	39.281		0.204086
C4mmim	BrO3	997.581	30.5918	36.515	1038.34	65.6901	37.5668	2627.66	7161.03	100.661	996.316	21.583	36.4829	1007.42	46.6333	36.9053	1149.91	177.558	40.5093		0.200523
C4mmim	IO3	997.581	31.1467	36.5262	1038.34	64.1033	37.5444	2627.66	16878.2	140.898	996.316	21.583	36.4829	1007.42	53.7951	37.027	1149.91	177.558	40.5093		0.350151
C4mmim	HCO3	997.581	30.2022	36.5073	1038.34	63.5545	37.5368	2627.66	933.767	62.3936	996.316	21.8876	36.4966	1007.42	37.3303	36.7423	1149.91	145.581	40.0999		0.207597
C4py	NTf2	790.337	2198.94	61.4798	824.854	2344.38	62.9261	2234.82	7682.48	104.595	781.201	2167.13	61.1555	798.535	2231.79	61.8385	922.336	2727.4	66.7083		0.150876
C4py	OTf	790.337	239.692	36.7072	824.854	318.974	38.2354	2234.82	3218	76.2638	781.201	223.122	36.3868	798.535	257.468	37.081	922.336	528.183	42.1189		0.174113
C4py	EtSO4	790.337	202.828	36.3201	824.854	250.52	37.4801	2234.82	2489.89	71.4521	781.201	190.879	36.1801	798.535	216.344	36.647	922.336	390.159	40.6325		0.192056
C4py	OcSO4	790.337	2902.8	71.2642	824.854	2969.82	71.9984	2234.82	5869.92	98.5436	781.201	2889.07	71.225	798.535	2921.75	71.4633	922.336	3160.72	74.0743		0.191716
C4py	FAP	790.337	7710.19	99.0619	824.854	7982.73	100.612	2234.82	15722	139.796	781.201	7658.76	98.7522	798.535	7758.54	99.3529	922.336	8641.58	104.393		0.135448
C4py	Phosph	790.337	7322.91	102.688	824.854	7392.66	103.22	2234.82	10643.6	125.409	781.201	7333.31	102.811	798.535	7342.23	102.835	922.336	7597.83	104.766		0.193555
C4py	Cl	790.337	3.4225	32.5704	824.854	9.9856	33.2227	2234.82	1256.7	61.4585	781.201	1	32.45	798.535	9	32.7872	922.336	49	35.2704		0.199661
C4py	BF4	790.337	51.8634	33.4912	824.854	111.107	34.8896	2234.82	1604.48	64.3218	781.201	43.6333	33.2866	798.535	63.241	33.7935	922.336	248.388	38.1576		0.194541
C4py	PF6	790.337	125.135	34.6981	824.854	211.514	36.4088	2234.82	3223.46	76.0104	781.201	111.678	34.4093	798.535	142.086	35.0856	922.336	430.419	40.5709		0.172219
C4py	CH3COO	790.337	31.523	33.1332	824.854	57.9959	34.0652	2234.82	821.689	57.8871	781.201	25.3247	33.0303	798.535	37.3303	33.3467	922.336	125.15	36.4555		0.211314
C4py	DCA	790.337	81.3496	34.2146	824.854	108.877	35.1354	2234.82	944.679	59.1419	781.201	68.6945	33.9411	798.535	88.2503	34.4384	922.336	1.74788	34.5987		0.25235
C4py	C(CN)3	790.337	222.768	36.6213	824.854	257.604	37.5699	2234.82	1367.68	62.8509	781.201	204.403	36.2767	798.535	231.512	36.8511	922.336	342.682	39.975		0.206935
C4py	Ser	790.337	202.374	36.2665	824.854	249.897	37.39	2234.82	1581.96	64.4782	781.201	190.937	36.0832	798.535	213.116	36.524	922.336	366.464	40.1995		0.19892
C4py	Tau	790.337	202.649	36.3241	824.854	249.518	37.4455	2234.82	2432.11	71.033	781.201	191.306	36.1663	798.535	216.344	36.647	922.336	382.727	40.4969		0.192138
C4py	Lys	790.337	908.61	47.6578	824.854	962.631	48.5894	2234.82	2643.91	74.003	781.201	898.772	47.571	798.535	921.417	47.8748	922.336	1097.47	50.9804		0.197306
C4py	Thr	790.337	302.156	37.9012	824.854	352.483	39.0194	2234.82	1820.55	66.4807	781.201	291.004	37.7624	798.535	313.63	38.1576	922.336	477.559	41.833		0.197328
C4py	Pro	790.337	274.927	37.5737	824.854	318.299	38.6159	2234.82	1680.22	65.4364	781.201	261.498	37.3898	798.535	284.99	37.8153	922.336	428.649	41.2795		0.200497
C4py	Val	790.337	303.597	37.9181	824.854	346.745	38.9511	2234.82	1707.11	65.6348	781.201	296.591	37.8682	798.535	313.63	38.1576	922.336	456.551	41.5933		0.200278
C4py	NPf2	790.337	6658.66	96.5066	824.854	6866.13	97.7551	2234.82	13684.8	134.88	781.201	6613.98	96.2289	798.535	6701.95	96.7884	922.336	7395.25	100.985		0.150688
C4py	MeOHPO2	790.337	55.565	33.558	824.854	90.1336	34.5914	2234.82	1904.8	66.692	781.201	47.9123	33.4365	798.535	66.7219	33.8674	922.336	191.421	37.4166		0.198155
C4py	Cys	790.337	204.091	36.2867	824.854	243.957	37.3207	2234.82	2342.92	70.2134	781.201	190.937	36.0832	798.535	218.17	36.5923	922.336	366.464	40.1995		0.188542
C4py	MeSO4	790.337	107.281	34.5241	824.854	152.556	35.6967	2234.82	2269.5	69.5497	781.201	95.9101	34.3657	798.535	120.152	34.8569	922.336	285.017	38.8716		0.193454
C4py	DMP	790.337	187.969	35.9352	824.854	233.047	37.0796	2234.82	2405.3	70.7677	781.201	178.846	35.8608	798.535	201.033	36.2629	922.336	363.453	40.1497		0.195358
C4py	NO3	790.337	29.486	33.0989	824.854	66.1359	34.1834	2234.82	985.608	59.2851	781.201	21.583	32.8938	798.535	37.3303	33.3467	922.336	154.43	36.8511		0.206629
C4py	NO2	790.337	13.5392	32.796	824.854	40.3355	33.7442	2234.82	715.704	56.9273	781.201	7.4641	32.619	798.535	19.3808	33.0151	922.336	104.445	36.1109		0.212714
C4py	SCN	790.337	16.2447	32.8378	824.854	29.805	33.5882	2234.82	1375.96	62.4616	781.201	7.4641	32.619	798.535	24.3725	33.0908	922.336	84.4425	35.8329		0.201596
C4py	BrO3	790.337	30.5918	33.1224	824.854	65.6901	34.1764	2234.82	7161.03	98.501	781.201	21.583	32.8938	798.535	46.6333	33.5261	922.336	177.558	37.1753		0.193003
C4py	IO3	790.337	31.1467	33.1348	824.854	64.1033	34.1517	2234.82	16878.2	139.363	781.201	21.583	32.8938	798.535	53.7951	33.6601	922.336	177.558	37.1753		0.340407
C4py	HCO3	790.337	30.2022	33.1139	824.854	63.5545	34.1433	2234.82	933.767	58.8446	781.201	21.8876	32.909	798.535	37.3303	33.3467	922.336	145.581	36.7287		0.206784
C6py	NTf2	1787.47	2198.94	71.8348	1828.3	2344.38	73.1212	3500.86	7682.48	112.262	1778.86	2167.13	71.5681	1797.15	2231.79	72.1526	1943.85	2727.4	76.5245		0.151977
C6py	OTf	1787.47	239.692	52.2293	1828.3	318.974	53.3756	3500.86	3218	86.4792	1778.86	223.122	52.0192	1797.15	257.468	52.5071	1943.85	528.183	56.3915		0.171886
C6py	EtSO4	1787.47	202.828	51.958	1828.3	250.52	52.8372	3500.86	2489.89	82.2672	1778.86	190.879	51.8748	1797.15	216.344	52.2015	1943.85	390.159	55.2901		0.190211
C6py	OcSO4	1787.47	2902.8	80.3684	1828.3	2969.82	81.0603	3500.86	5869.92	106.646	1778.86	2889.07	80.343	1797.15	2921.75	80.5543	1943.85	3160.72	83.0241		0.190617
C6py	FAP	1787.47	7710.19	105.8	1828.3	7982.73	107.283	3500.86	15722	145.621	1778.86	7658.76	105.518	1797.15	7758.54	106.08	1943.85	8641.58	110.923		0.135336
C6py	Phosph	1787.47	7322.91	109.203	1828.3	7392.66	109.733	3500.86	10643.6	131.871	1778.86	7333.31	109.325	1797.15	7342.23	109.348	1943.85	7597.83	111.274		0.190573
C6py	Cl	1787.47	3.4225	49.4096	1828.3	9.9856	49.9075	3500.86	1256.7	73.7538	1778.86	1	49.3457	1797.15	9	49.5681	1943.85	49	51.4782		0.205596
C6py	BF4	1787.47	51.8634	50.0214	1828.3	111.107	51.0323	3500.86	1604.48	76.1563	1778.86	43.6333	49.8999	1797.15	63.241	50.2394	1943.85	248.388	53.4977		0.190843
C6py	PF6	1787.47	125.135	50.8373	1828.3	211.514	52.0827	3500.86	3223.46	86.2558	1778.86	111.678	50.6557	1797.15	142.086	51.1175	1943.85	430.419	55.2449		0.169263
C6py	CH3COO	1787.47	31.523	49.7824	1828.3	57.9959	50.4722	3500.86	821.689	70.8054	1778.86	25.3247	49.7293	1797.15	37.3303	49.94	1943.85	125.15	52.2972		0.209971
C6py	DCA	1787.47	81.3496	50.5086	1828.3	108.877	51.2006	3500.86	944.679	71.8348	1778.86	68.6945	50.3389	1797.15	88.2503	50.6754	1943.85	1.74788	51.0203		0.277966
C6py	C(CN)3	1787.47	222.768	52.169	1828.3	257.604	52.9009	3500.86	1367.68	74.9181	1778.86	204.403	51.9423	1797.15	231.512	52.345	1943.85	342.682	54.8088		0.208346
C6py	Ser	1787.47	202.374	51.9205	1828.3	249.897	52.7733	3500.86	1581.96	76.2884	1778.86	190.937	51.8073	1797.15	213.116	52.1153	1943.85	366.464	54.9727		0.19713
C6py	Tau	1787.47	202.649	51.9608	1828.3	249.518	52.8126	3500.86	2432.11	81.9034	1778.86	191.306	51.8652	1797.15	216.344	52.2015	1943.85	382.727	55.1906		0.190847
C6py	Lys	1787.47	908.61	60.4297	1828.3	962.631	61.2204	3500.86	2643.91	84.4921	1778.86	898.772	60.3738	1797.15	921.417	60.6135	1943.85	1097.47	63.2851		0.196083
C6py	Thr	1787.47	302.156	53.0752	1828.3	352.483	53.94	3500.86	1820.55	77.9882	1778.86	291.004	52.9906	1797.15	313.63	53.2729	1943.85	477.559	56.1783		0.195495
C6py	Pro	1787.47	274.927	52.8418	1828.3	318.299	53.6488	3500.86	1680.22	77.0999	1778.86	261.498	52.7257	1797.15	284.99	53.0283	1943.85	428.649	55.7674		0.20001
C6py	Val	1787.47	303.597	53.0873	1828.3	346.745	53.8905	3500.86	1707.11	77.2684	1778.86	296.591	53.066	1797.15	313.63	53.2729	1943.85	456.551	56		0.198567
C6py	NPf2	1787.47	6658.66	103.412	1828.3	6866.13	104.609	3500.86	13684.8	140.908	1778.86	6613.98	103.16	1797.15	6701.95	103.682	1943.85	7395.25	107.722		0.150513
C6py	MeOHPO2	1787.47	55.565	50.0662	1828.3	90.1336	50.8288	3500.86	1904.8	78.1684	1778.86	47.9123	50	1797.15	66.7219	50.2892	1943.85	191.421	52.9717		0.197053
C6py	Cys	1787.47	204.091	51.9346	1828.3	243.957	52.7242	3500.86	2342.92	81.1936	1778.86	190.937	51.8073	1797.15	218.17	52.1632	1943.85	366.464	54.9727		0.188988
C6py	MeSO4	1787.47	107.281	50.7188	1828.3	152.556	51.5874	3500.86	2269.5	80.6204	1778.86	95.9101	50.6261	1797.15	120.152	50.9608	1943.85	285.017	54.0093		0.191053
C6py	DMP	1787.47	187.969	51.6897	1828.3	233.047	52.5538	3500.86	2405.3	81.6734	1778.86	178.846	51.6527	1797.15	201.033	51.9326	1943.85	363.453	54.9363		0.192969
C6py	NO3	1787.47	29.486	49.7596	1828.3	66.1359	50.5521	3500.86	985.608	71.9528	1778.86	21.583	49.6387	1797.15	37.3303	49.94	1943.85	154.43	52.5738		0.20417
C6py	NO2	1787.47	13.5392	49.5587	1828.3	40.3355	50.2561	3500.86	715.704	70.0229	1778.86	7.4641	49.4571	1797.15	19.3808	49.7192	1943.85	104.445	52.0577		0.211064
C6py	SCN	1787.47	16.2447	49.5863	1828.3	29.805	50.1515	3500.86	1375.96	74.5917	1778.86	7.4641	49.4571	1797.15	24.3725	49.7695	1943.85	84.4425	51.8652		0.205195
C6py	BrO3	1787.47	30.5918	49.7752	1828.3	65.6901	50.5473	3500.86	7161.03	106.606	1778.86	21.583	49.6387	1797.15	46.6333	50.06	1943.85	177.558	52.8015		0.212615
C6py	IO3	1787.47	31.1467	49.7835	1828.3	64.1033	50.5306	3500.86	16878.2	145.205	1778.86	21.583	49.6387	1797.15	53.7951	50.1498	1943.85	177.558	52.8015		0.368094
C6py	HCO3	1787.47	30.2022	49.7696	1828.3	63.5545	50.525	3500.86	933.767	71.5902	1778.86	21.8876	49.6488	1797.15	37.3303	49.94	1943.85	145.581	52.4881		0.205313
C8py	NTf2	3536.84	2198.94	87.1821	3584.1	2344.38	88.282	5519.42	7682.48	123.795	3528.76	2167.13	86.9713	3548.03	2231.79	87.4528	3718.04	2727.4	91.225		0.157097
C8py	OTf	3536.84	239.692	71.8914	3584.1	318.974	72.7733	5519.42	3218	101.001	3528.76	223.122	71.7496	3548.03	257.468	72.1041	3718.04	528.183	75.1399		0.177654
C8py	EtSO4	3536.84	202.828	71.6946	3584.1	250.52	72.3793	5519.42	2489.89	97.4185	3528.76	190.879	71.645	3548.03	216.344	71.8818	3718.04	390.159	74.3169		0.19499
C8py	OcSO4	3536.84	2902.8	94.3374	3584.1	2969.82	94.962	5519.42	5869.92	118.726	3528.76	2889.07	94.3239	3548.03	2921.75	94.504	3718.04	3160.72	96.7419		0.191744
C8py	FAP	3536.84	7710.19	116.766	3584.1	7982.73	118.139	5519.42	15722	154.687	3528.76	7658.76	116.516	3548.03	7758.54	117.026	3718.04	8641.58	121.532		0.137731
C8py	Phosph	3536.84	7322.91	119.857	3584.1	7392.66	120.367	5519.42	10643.6	141.818	3528.76	7333.31	119.975	3548.03	7342.23	119.996	3718.04	7597.83	121.852		0.189017
C8py	Cl	3536.84	3.4225	69.8698	3584.1	9.9856	70.2692	5519.42	1256.7	90.3444	3528.76	1	69.8355	3548.03	9	69.9929	3718.04	49	71.5262		0.2134
C8py	BF4	3536.84	51.8634	70.3038	3584.1	111.107	71.0725	5519.42	1604.48	92.3161	3528.76	43.6333	70.2282	3548.03	63.241	70.4699	3718.04	248.388	72.9932		0.193061
C8py	PF6	3536.84	125.135	70.8866	3584.1	211.514	71.8304	5519.42	3223.46	100.809	3528.76	111.678	70.7672	3548.03	142.086	71.0985	3718.04	430.419	74.2832		0.175814
C8py	CH3COO	3536.84	31.523	70.1339	3584.1	57.9959	70.6714	5519.42	821.689	87.9539	3528.76	25.3247	70.1071	3548.03	37.3303	70.2567	3718.04	125.15	72.118		0.211376
C8py	DCA	3536.84	81.3496	70.6513	3584.1	108.877	71.1934	5519.42	944.679	88.7847	3528.76	68.6945	70.5408	3548.03	88.2503	70.7814	3718.04	1.74788	71.1974		0.296172
C8py	C(CN)3	3536.84	222.768	71.8476	3584.1	257.604	72.4259	5519.42	1367.68	91.2973	3528.76	204.403	71.6938	3548.03	231.512	71.9861	3718.04	342.682	73.9594		0.211857
C8py	Ser	3536.84	202.374	71.6674	3584.1	249.897	72.3327	5519.42	1581.96	92.4251	3528.76	190.937	71.5961	3548.03	213.116	71.8192	3718.04	366.464	74.081		0.199202
C8py	Tau	3536.84	202.649	71.6966	3584.1	249.518	72.3614	5519.42	2432.11	97.1115	3528.76	191.306	71.638	3548.03	216.344	71.8818	3718.04	382.727	74.2428		0.19586
C8py	Lys	3536.84	908.61	78.0527	3584.1	962.631	78.7079	5519.42	2643.91	99.3046	3528.76	898.772	78.0192	3548.03	921.417	78.2049	3718.04	1097.47	80.4425		0.19732
C8py	Thr	3536.84	302.156	72.5083	3584.1	352.483	73.1883	5519.42	1820.55	93.8331	3528.76	291.004	72.4569	3548.03	313.63	72.6636	3718.04	477.559	74.98		0.197487
C8py	Pro	3536.84	274.927	72.3377	3584.1	318.299	72.9739	5519.42	1680.22	93.0961	3528.76	261.498	72.2634	3548.03	284.99	72.4845	3718.04	428.649	74.6726		0.202742
C8py	Val	3536.84	303.597	72.5172	3584.1	346.745	73.1519	5519.42	1707.11	93.2356	3528.76	296.591	72.5121	3548.03	313.63	72.6636	3718.04	456.551	74.8465		0.200407
C8py	NPf2	3536.84	6658.66	114.606	3584.1	6866.13	115.715	5519.42	13684.8	150.258	3528.76	6613.98	114.385	3548.03	6701.95	114.856	3718.04	7395.25	118.617		0.15284
C8py	MeOHPO2	3536.84	55.565	70.3356	3584.1	90.1336	70.9265	5519.42	1904.8	93.9829	3528.76	47.9123	70.2994	3548.03	66.7219	70.5053	3718.04	191.421	72.6085		0.202272
C8py	Cys	3536.84	204.091	71.6776	3584.1	243.957	72.2969	5519.42	2342.92	96.5137	3528.76	190.937	71.5961	3548.03	218.17	71.854	3718.04	366.464	74.081		0.194894
C8py	MeSO4	3536.84	107.281	70.8016	3584.1	152.556	71.4721	5519.42	2269.5	96.0319	3528.76	95.9101	70.746	3548.03	120.152	70.9859	3718.04	285.017	73.3689		0.195905
C8py	DMP	3536.84	187.969	71.5003	3584.1	233.047	72.1728	5519.42	2405.3	96.9176	3528.76	178.846	71.4843	3548.03	201.033	71.6868	3718.04	363.453	74.054		0.197422
C8py	NO3	3536.84	29.486	70.1178	3584.1	66.1359	70.7285	5519.42	985.608	88.8802	3528.76	21.583	70.0428	3548.03	37.3303	70.2567	3718.04	154.43	72.3187		0.205408
C8py	NO2	3536.84	13.5392	69.9753	3584.1	40.3355	70.5173	5519.42	715.704	87.3251	3528.76	7.4641	69.9142	3548.03	19.3808	70.0999	3718.04	104.445	71.9444		0.21203
C8py	SCN	3536.84	16.2447	69.9949	3584.1	29.805	70.4427	5519.42	1375.96	91.0297	3528.76	7.4641	69.9142	3548.03	24.3725	70.1356	3718.04	84.4425	71.8053		0.211898
C8py	BrO3	3536.84	30.5918	70.1288	3584.1	65.6901	70.7251	5519.42	7161.03	118.69	3528.76	21.583	70.0428	3548.03	46.6333	70.342	3718.04	177.558	72.4845		0.2452
C8py	IO3	3536.84	31.1467	70.1347	3584.1	64.1033	70.7132	5519.42	16878.2	154.295	3528.76	21.583	70.0428	3548.03	53.7951	70.406	3718.04	177.558	72.4845		0.419648
C8py	HCO3	3536.84	30.2022	70.1248	3584.1	63.5545	70.7091	5519.42	933.767	88.5869	3528.76	21.8876	70.05	3548.03	37.3303	70.2567	3718.04	145.581	72.2565		0.206968
N4，4，4，4	NTf2	4839.93	2198.94	91.9589	4895.3	2344.38	93.0549	7206.64	7682.48	128.856	4868.89	2167.13	91.9348	4852.97	2231.79	92.228	5053.85	2727.4	96		0.151385
N4，4，4，4	OTf	4839.93	239.692	77.6151	4895.3	318.974	78.495	7206.64	3218	107.144	4868.89	223.122	77.6917	4852.97	257.468	77.8267	5053.85	528.183	80.8703		0.171691
N4，4，4，4	EtSO4	4839.93	202.828	77.4328	4895.3	250.52	78.1299	7206.64	2489.89	103.774	4868.89	190.879	77.5951	4852.97	216.344	77.6209	5053.85	390.159	80.1062		0.188203
N4，4，4，4	OcSO4	4839.93	2902.8	98.7688	4895.3	2969.82	99.4147	7206.64	5869.92	123.994	4868.89	2889.07	98.9192	4852.97	2921.75	98.9394	5053.85	3160.72	101.257		0.183546
N4，4，4，4	FAP	4839.93	7710.19	120.374	4895.3	7982.73	121.747	7206.64	15722	158.766	4868.89	7658.76	120.266	4852.97	7758.54	120.636	5053.85	8641.58	125.156		0.130782
N4，4，4，4	Phosph	4839.93	7322.91	123.375	4895.3	7392.66	123.91	7206.64	10643.6	146.257	4868.89	7333.31	123.62	4852.97	7342.23	123.519	5053.85	7597.83	125.467		0.179885
N4，4，4，4	Cl	4839.93	3.4225	75.7464	4895.3	9.9856	76.1792	7206.64	1256.7	97.1639	4868.89	1	75.9276	4852.97	9	75.8749	5053.85	49	77.5242		0.20616
N4，4，4，4	BF4	4839.93	51.8634	76.1468	4895.3	111.107	76.9208	7206.64	1604.48	98.9999	4868.89	43.6333	76.2889	4852.97	63.241	76.3151	5053.85	248.388	78.8797		0.184999
N4，4，4，4	PF6	4839.93	125.135	76.6853	4895.3	211.514	77.6216	7206.64	3223.46	106.964	4868.89	111.678	76.7854	4852.97	142.086	76.896	5053.85	430.419	80.075		0.170219
N4，4，4，4	CH3COO	4839.93	31.523	75.9901	4895.3	57.9959	76.5503	7206.64	821.689	94.9453	4868.89	25.3247	76.1774	4852.97	37.3303	76.1183	5053.85	125.15	78.0705		0.202261
N4，4，4，4	DCA	4839.93	81.3496	76.4678	4895.3	108.877	77.0325	7206.64	944.679	95.7154	4868.89	68.6945	76.5768	4852.97	88.2503	76.6029	5053.85	1.74788	77.2209		0.290493
N4，4，4，4	C(CN)3	4839.93	222.768	77.5745	4895.3	257.604	78.173	7206.64	1367.68	98.0506	4868.89	204.403	77.6402	4852.97	231.512	77.7174	5053.85	342.682	79.7747		0.203514
N4，4，4，4	Ser	4839.93	202.374	77.4076	4895.3	249.897	78.0867	7206.64	1581.96	99.1016	4868.89	190.937	77.55	4852.97	213.116	77.5629	5053.85	366.464	79.8874		0.190829
N4，4，4，4	Tau	4839.93	202.649	77.4346	4895.3	249.518	78.1133	7206.64	2432.11	103.486	4868.89	191.306	77.5887	4852.97	216.344	77.6209	5053.85	382.727	80.0375		0.189062
N4，4，4，4	Lys	4839.93	908.61	83.3544	4895.3	962.631	84.0265	7206.64	2643.91	105.547	4868.89	898.772	83.5165	4852.97	921.417	83.5105	5053.85	1097.47	85.8196		0.188795
N4，4，4，4	Thr	4839.93	302.156	78.1868	4895.3	352.483	78.8799	7206.64	1820.55	100.416	4868.89	291.004	78.3454	4852.97	313.63	78.3454	5053.85	477.559	80.7217		0.189198
N4，4，4，4	Pro	4839.93	274.927	78.0286	4895.3	318.299	78.681	7206.64	1680.22	99.7276	4868.89	261.498	78.1665	4852.97	284.99	78.1793	5053.85	428.649	80.4363		0.194498
N4，4，4，4	Val	4839.93	303.597	78.195	4895.3	346.745	78.8461	7206.64	1707.11	99.8579	4868.89	296.591	78.3964	4852.97	313.63	78.3454	5053.85	456.551	80.5978		0.191971
N4，4，4，4	NPf2	4839.93	6658.66	118.28	4895.3	6866.13	119.397	7206.64	13684.8	154.455	4868.89	6613.98	118.203	4852.97	6701.95	118.533	5053.85	7395.25	122.327		0.145761
N4，4，4，4	MeOHPO2	4839.93	55.565	76.1762	4895.3	90.1336	76.7859	7206.64	1904.8	100.556	4868.89	47.9123	76.3544	4852.97	66.7219	76.3479	5053.85	191.421	78.5239		0.195205
N4，4，4，4	Cys	4839.93	204.091	77.4171	4895.3	243.957	78.0535	7206.64	2342.92	102.925	4868.89	190.937	77.55	4852.97	218.17	77.5951	5053.85	366.464	79.8874		0.188165
N4，4，4，4	MeSO4	4839.93	107.281	76.6067	4895.3	152.556	77.2902	7206.64	2269.5	102.474	4868.89	95.9101	76.7659	4852.97	120.152	76.7919	5053.85	285.017	79.2275		0.189072
N4，4，4，4	DMP	4839.93	187.969	77.253	4895.3	233.047	77.9385	7206.64	2405.3	103.304	4868.89	178.846	77.4468	4852.97	201.033	77.4403	5053.85	363.453	79.8624		0.19052
N4，4，4，4	NO3	4839.93	29.486	75.9751	4895.3	66.1359	76.603	7206.64	985.608	95.804	4868.89	21.583	76.1183	4852.97	37.3303	76.1183	5053.85	154.43	78.256		0.196463
N4，4，4，4	NO2	4839.93	13.5392	75.8437	4895.3	40.3355	76.4081	7206.64	715.704	94.3631	4868.89	7.4641	76	4852.97	19.3808	75.9737	5053.85	104.445	77.9102		0.202725
N4，4，4，4	SCN	4839.93	16.2447	75.8617	4895.3	29.805	76.3393	7206.64	1375.96	97.8015	4868.89	7.4641	76	4852.97	24.3725	76.0066	5053.85	84.4425	77.7817		0.204569
N4，4，4，4	BrO3	4839.93	30.5918	75.9853	4895.3	65.6901	76.5999	7206.64	7161.03	123.96	4868.89	21.583	76.1183	4852.97	46.6333	76.1971	5053.85	177.558	78.4092		0.248462
N4，4，4，4	IO3	4839.93	31.1467	75.9907	4895.3	64.1033	76.5889	7206.64	16878.2	158.385	4868.89	21.583	76.1183	4852.97	53.7951	76.2561	5053.85	177.558	78.4092		0.431739
N4，4，4，4	HCO3	4839.93	30.2022	75.9816	4895.3	63.5545	76.5851	7206.64	933.767	95.532	4868.89	21.8876	76.1249	4852.97	37.3303	76.1183	5053.85	145.581	78.1985		0.198039
